# Supplementary material for: Chantriolides F–P, Highly Oxidized Withanolides with Hepatoprotective Activity from Tacca chantrieri
Source: MDPI journal article supplement (doi:10.3390/molecules27238197), 2022-11-24
Supplement: s1 [file s1]

**Supporting information for**

**Chantriolides F–P, Highly Oxidized Withanolides with Hepatoprotective**

**Activity from *Tacca chantrieri***

Yue Yang,<sup>1,2</sup> Fei Zhou,<sup>3</sup> Min Wang,<sup>2,4</sup> Turanazarov Mukhammadrizo,<sup>2,4</sup> Xiao-Rong Wang,<sup>5</sup> Changqiang

Ke,<sup>1,2</sup> Sheng Yao,<sup>1,2</sup> Ligen Lin,<sup>3</sup> Chunping Tang,<sup>1,2,\*</sup> Yang Ye<sup>1,2,4,6,\*</sup>

<sup>1</sup> State Key Laboratory of Drug Research, Shanghai Institute of Materia Medica, Chinese Academy of Sciences, Shanghai 201203, China

<sup>2</sup> Natural Products Chemistry Department, Shanghai Institute of Materia Medica, Chinese Academy of Sciences, Shanghai 201203, China

<sup>3</sup> State Key Laboratory of Quality Research in Chinese Medicine, Institute of Chinese Medical Sciences, University of Macau, Avenida da Universidade, Taipa, Macau 999078, China

<sup>4</sup> University of Chinese Academy of Sciences, No. 19A Yuquan Road, Beijing 100049, China

<sup>5</sup> Xishuangbanna Research Institute of Nationality Medicine, Xishuangbanna Hospital of Traditional Dai Medicine, No.8, Zhuangdong Western Road of Xishuangbanna Tourism and Resort Zone, Xishuangbanna 666100, China

<sup>6</sup> School of Life Science and Technology, ShanghaiTech University, 393 Middle Huaxia Road, Pudong, Shanghai 201210, China

\* Correspondence: tangcp@simmm.ac.cn (C.T.); yye@simmm.ac.cn (Y.Y.)

## Contents

|                                                                                                                                                          |    |
|----------------------------------------------------------------------------------------------------------------------------------------------------------|----|
| <b>Figure S1.</b> Key $^1\text{H}$ - $^1\text{H}$ COSY and HMBC correlations of compounds <b>1–4</b> , <b>6–8</b> , <b>10</b> , and <b>11</b> ...        | 5  |
| <b>Figure S2.</b> NOESY correlations of compounds <b>1–3</b> and ROESY correlations of compounds <b>4</b> , <b>6–8</b> , <b>10</b> , and <b>11</b> ..... | 5  |
| <b>Figure S3.</b> HRESIMS spectrum of chantriolide <b>F (1)</b> .....                                                                                    | 6  |
| <b>Figure S4.</b> IR spectrum of chantriolide <b>F (1)</b> .....                                                                                         | 6  |
| <b>Figure S5.</b> $^1\text{H}$ NMR (500 MHz) spectrum of chantriolide <b>F (1)</b> in $\text{C}_5\text{D}_5\text{N}$ .....                               | 7  |
| <b>Figure S6.</b> $^{13}\text{C}$ and DEPT-135 NMR (125 MHz) spectra of chantriolide <b>F (1)</b> in $\text{C}_5\text{D}_5\text{N}$ .....                | 7  |
| <b>Figure S7.</b> HSQC spectrum of chantriolide <b>F (1)</b> in $\text{C}_5\text{D}_5\text{N}$ .....                                                     | 8  |
| <b>Figure S8.</b> $^1\text{H}$ - $^1\text{H}$ COSY spectrum of chantriolide <b>F (1)</b> in $\text{C}_5\text{D}_5\text{N}$ .....                         | 8  |
| <b>Figure S9.</b> HMBC spectrum of chantriolide <b>F (1)</b> in $\text{C}_5\text{D}_5\text{N}$ .....                                                     | 9  |
| <b>Figure S10.</b> NOESY spectrum of chantriolide <b>F (1)</b> in $\text{C}_5\text{D}_5\text{N}$ .....                                                   | 9  |
| <b>Figure S11.</b> HRESIMS spectrum of chantriolide <b>G (2)</b> .....                                                                                   | 10 |
| <b>Figure S12.</b> IR spectrum of chantriolide <b>G (2)</b> .....                                                                                        | 10 |
| <b>Figure S13.</b> $^1\text{H}$ NMR (600 MHz) spectrum of chantriolide <b>G (2)</b> in $\text{C}_5\text{D}_5\text{N}$ .....                              | 11 |
| <b>Figure S14.</b> $^{13}\text{C}$ and DEPT-135 NMR (125 MHz) spectra of chantriolide <b>G (2)</b> in $\text{C}_5\text{D}_5\text{N}$ ...                 | 11 |
| <b>Figure S15.</b> HSQC spectrum of chantriolide <b>G (2)</b> in $\text{C}_5\text{D}_5\text{N}$ .....                                                    | 12 |
| <b>Figure S16.</b> $^1\text{H}$ - $^1\text{H}$ COSY spectrum of chantriolide <b>G (2)</b> in $\text{C}_5\text{D}_5\text{N}$ .....                        | 12 |
| <b>Figure S17.</b> HMBC spectrum of chantriolide <b>G (2)</b> in $\text{C}_5\text{D}_5\text{N}$ .....                                                    | 13 |
| <b>Figure S18.</b> NOESY spectrum of chantriolide <b>G (2)</b> in $\text{C}_5\text{D}_5\text{N}$ .....                                                   | 13 |
| <b>Figure S19.</b> HRESIMS spectrum of chantriolide <b>H (3)</b> .....                                                                                   | 14 |
| <b>Figure S20.</b> IR spectrum of chantriolide <b>H (3)</b> .....                                                                                        | 14 |
| <b>Figure S21.</b> $^1\text{H}$ NMR (600 MHz) spectrum of chantriolide <b>H (3)</b> in $\text{C}_5\text{D}_5\text{N}$ .....                              | 15 |
| <b>Figure S22.</b> $^{13}\text{C}$ and DEPT-135 NMR (125 MHz) spectra of chantriolide <b>H (3)</b> in $\text{C}_5\text{D}_5\text{N}$ ...                 | 15 |
| <b>Figure S23.</b> HSQC spectrum of chantriolide <b>H (3)</b> in $\text{C}_5\text{D}_5\text{N}$ .....                                                    | 16 |
| <b>Figure S24.</b> $^1\text{H}$ - $^1\text{H}$ COSY spectrum of chantriolide <b>H (3)</b> in $\text{C}_5\text{D}_5\text{N}$ .....                        | 16 |
| <b>Figure S25.</b> HMBC spectrum of chantriolide <b>H (3)</b> in $\text{C}_5\text{D}_5\text{N}$ .....                                                    | 17 |
| <b>Figure S26.</b> NOESY spectrum of chantriolide <b>H (3)</b> in $\text{C}_5\text{D}_5\text{N}$ .....                                                   | 17 |
| <b>Figure S27.</b> HRESIMS spectrum of chantriolide <b>I (4)</b> .....                                                                                   | 18 |
| <b>Figure S28.</b> IR spectrum of chantriolide <b>I (4)</b> .....                                                                                        | 18 |
| <b>Figure S29.</b> $^1\text{H}$ NMR (400 MHz) spectrum of chantriolide <b>I (4)</b> in $\text{CDCl}_3$ .....                                             | 19 |
| <b>Figure S30.</b> $^{13}\text{C}$ and DEPT-135 NMR (125 MHz) spectra of chantriolide <b>I (4)</b> in $\text{CDCl}_3$ .....                              | 19 |
| <b>Figure S31.</b> HSQC spectrum of chantriolide <b>I (4)</b> in $\text{CDCl}_3$ .....                                                                   | 20 |
| <b>Figure S32.</b> $^1\text{H}$ - $^1\text{H}$ COSY spectrum of chantriolide <b>I (4)</b> in $\text{CDCl}_3$ .....                                       | 20 |
| <b>Figure S33.</b> HMBC spectrum of chantriolide <b>I (4)</b> in $\text{CDCl}_3$ .....                                                                   | 21 |
| <b>Figure S34.</b> ROESY spectrum of chantriolide <b>I (4)</b> in $\text{CDCl}_3$ .....                                                                  | 21 |
| <b>Figure S35.</b> HRESIMS spectrum of chantriolide <b>J (5)</b> .....                                                                                   | 22 |
| <b>Figure S36.</b> IR spectrum of chantriolide <b>J (5)</b> .....                                                                                        | 22 |
| <b>Figure S37.</b> $^1\text{H}$ NMR (600 MHz) spectrum of chantriolide <b>J (5)</b> in $\text{C}_5\text{D}_5\text{N}$ .....                              | 23 |
| <b>Figure S38.</b> $^{13}\text{C}$ and DEPT-135 NMR (125 MHz) spectra of chantriolide <b>J (5)</b> in $\text{C}_5\text{D}_5\text{N}$ ....                | 23 |
| <b>Figure S39.</b> HSQC spectrum of chantriolide <b>J (5)</b> in $\text{C}_5\text{D}_5\text{N}$ .....                                                    | 24 |
| <b>Figure S40.</b> $^1\text{H}$ - $^1\text{H}$ COSY spectrum of chantriolide <b>J (5)</b> in $\text{C}_5\text{D}_5\text{N}$ .....                        | 24 |
| <b>Figure S41.</b> HMBC spectrum of chantriolide <b>J (5)</b> in $\text{C}_5\text{D}_5\text{N}$ .....                                                    | 25 |
| <b>Figure S42.</b> ROESY spectrum of chantriolide <b>J (5)</b> in $\text{C}_5\text{D}_5\text{N}$ .....                                                   | 25 |

|                                                                                                                                             |    |
|---------------------------------------------------------------------------------------------------------------------------------------------|----|
| <b>Figure S43.</b> HRESIMS spectrum of chantriolide K ( <b>6</b> ) .....                                                                    | 26 |
| <b>Figure S44.</b> IR spectrum of chantriolide K ( <b>6</b> ).....                                                                          | 26 |
| <b>Figure S45.</b> <sup>1</sup> H NMR (600 MHz) spectrum of chantriolide K ( <b>6</b> ) in C <sub>5</sub> D <sub>5</sub> N .....            | 27 |
| <b>Figure S46.</b> <sup>13</sup> C and DEPT-135 NMR (125 MHz) spectra of chantriolide K ( <b>6</b> ) in C <sub>5</sub> D <sub>5</sub> N ... | 27 |
| <b>Figure S47.</b> HSQC spectrum of chantriolide K ( <b>6</b> ) in C <sub>5</sub> D <sub>5</sub> N.....                                     | 28 |
| <b>Figure S48.</b> <sup>1</sup> H- <sup>1</sup> H COSY spectrum of chantriolide K ( <b>6</b> ) in C <sub>5</sub> D <sub>5</sub> N .....     | 28 |
| <b>Figure S49.</b> HMBC spectrum of chantriolide K ( <b>6</b> ) in C <sub>5</sub> D <sub>5</sub> N.....                                     | 29 |
| <b>Figure S50.</b> ROESY spectrum of chantriolide K ( <b>6</b> ) in C <sub>5</sub> D <sub>5</sub> N.....                                    | 29 |
| <b>Figure S51.</b> HRESIMS spectrum of chantriolide L ( <b>7</b> ) .....                                                                    | 30 |
| <b>Figure S52.</b> IR spectrum of chantriolide L ( <b>7</b> ) .....                                                                         | 30 |
| <b>Figure S53.</b> <sup>1</sup> H NMR (600 MHz) spectrum of chantriolide L ( <b>7</b> ) in C <sub>5</sub> D <sub>5</sub> N .....            | 31 |
| <b>Figure S54.</b> <sup>13</sup> C and DEPT-135 NMR (125 MHz) spectra of chantriolide L ( <b>7</b> ) in C <sub>5</sub> D <sub>5</sub> N.... | 31 |
| <b>Figure S55.</b> HSQC spectrum of chantriolide L ( <b>7</b> ) in C <sub>5</sub> D <sub>5</sub> N .....                                    | 32 |
| <b>Figure S56.</b> <sup>1</sup> H- <sup>1</sup> H COSY spectrum of chantriolide L ( <b>7</b> ) in C <sub>5</sub> D <sub>5</sub> N.....      | 32 |
| <b>Figure S57.</b> HMBC spectrum of chantriolide L ( <b>7</b> ) in C <sub>5</sub> D <sub>5</sub> N .....                                    | 33 |
| <b>Figure S58.</b> ROESY spectrum of chantriolide L ( <b>7</b> ) in C <sub>5</sub> D <sub>5</sub> N .....                                   | 33 |
| <b>Figure S59.</b> HRESIMS spectrum of chantriolide M ( <b>8</b> ).....                                                                     | 34 |
| <b>Figure S60.</b> IR spectrum of chantriolide M ( <b>8</b> ) .....                                                                         | 34 |
| <b>Figure S61.</b> <sup>1</sup> H NMR (500 MHz) spectrum of chantriolide M ( <b>8</b> ) in CDCl <sub>3</sub> .....                          | 35 |
| <b>Figure S62.</b> <sup>13</sup> C and DEPT-135 NMR (125 MHz) spectra of chantriolide M ( <b>8</b> ) in CDCl <sub>3</sub> ...               | 35 |
| <b>Figure S63.</b> HSQC spectrum of chantriolide M ( <b>8</b> ) in CDCl <sub>3</sub> .....                                                  | 36 |
| <b>Figure S64.</b> <sup>1</sup> H- <sup>1</sup> H COSY spectrum of chantriolide M ( <b>8</b> ) in CDCl <sub>3</sub> .....                   | 36 |
| <b>Figure S65.</b> HMBC spectrum of chantriolide M ( <b>8</b> ) in CDCl <sub>3</sub> .....                                                  | 37 |
| <b>Figure S66.</b> ROESY spectrum of chantriolide M ( <b>8</b> ) in CDCl <sub>3</sub> .....                                                 | 37 |
| <b>Figure S67.</b> HRESIMS spectrum of chantriolide N ( <b>9</b> ) .....                                                                    | 38 |
| <b>Figure S68.</b> IR spectrum of chantriolide N ( <b>9</b> ).....                                                                          | 38 |
| <b>Figure S69.</b> <sup>1</sup> H NMR (600 MHz) spectrum of chantriolide N ( <b>9</b> ) in C <sub>5</sub> D <sub>5</sub> N .....            | 39 |
| <b>Figure S70.</b> <sup>13</sup> C and DEPT-135 NMR (125 MHz) spectra of chantriolide N ( <b>9</b> ) in C <sub>5</sub> D <sub>5</sub> N ... | 39 |
| <b>Figure S71.</b> HSQC spectrum of chantriolide N ( <b>9</b> ) in C <sub>5</sub> D <sub>5</sub> N.....                                     | 40 |
| <b>Figure S72.</b> <sup>1</sup> H- <sup>1</sup> H COSY spectrum of chantriolide N ( <b>9</b> ) in C <sub>5</sub> D <sub>5</sub> N .....     | 40 |
| <b>Figure S73.</b> HMBC spectrum of chantriolide N ( <b>9</b> ) in C <sub>5</sub> D <sub>5</sub> N.....                                     | 41 |
| <b>Figure S74.</b> ROESY spectrum of chantriolide N ( <b>9</b> ) in C <sub>5</sub> D <sub>5</sub> N.....                                    | 41 |
| <b>Figure S75.</b> HRESIMS spectrum of chantriolide O ( <b>10</b> ) .....                                                                   | 42 |
| <b>Figure S76.</b> IR spectrum of chantriolide O ( <b>10</b> ).....                                                                         | 42 |
| <b>Figure S77.</b> <sup>1</sup> H NMR (500 MHz) spectrum of chantriolide O ( <b>10</b> ) in C <sub>5</sub> D <sub>5</sub> N .....           | 43 |
| <b>Figure S78.</b> <sup>13</sup> C and DEPT-135 NMR (125 MHz) spectra of chantriolide O ( <b>10</b> ) in C <sub>5</sub> D <sub>5</sub> N .  | 43 |
| <b>Figure S79.</b> HSQC spectrum of chantriolide O ( <b>10</b> ) in C <sub>5</sub> D <sub>5</sub> N.....                                    | 44 |
| <b>Figure S80.</b> <sup>1</sup> H- <sup>1</sup> H COSY spectrum of chantriolide O ( <b>10</b> ) in C <sub>5</sub> D <sub>5</sub> N .....    | 44 |
| <b>Figure S81.</b> HMBC spectrum of chantriolide O ( <b>10</b> ) in C <sub>5</sub> D <sub>5</sub> N.....                                    | 45 |
| <b>Figure S82.</b> ROESY spectrum of chantriolide O ( <b>10</b> ) in C <sub>5</sub> D <sub>5</sub> N.....                                   | 45 |
| <b>Figure S83.</b> HRESIMS spectrum of chantriolide P ( <b>11</b> ) .....                                                                   | 46 |
| <b>Figure S84.</b> IR spectrum of chantriolide P ( <b>11</b> ).....                                                                         | 46 |
| <b>Figure S85.</b> <sup>1</sup> H NMR (600 MHz) spectrum of chantriolide P ( <b>11</b> ) in C <sub>5</sub> D <sub>5</sub> N .....           | 47 |
| <b>Figure S86.</b> <sup>13</sup> C and DEPT-135 NMR (125 MHz) spectra of chantriolide P ( <b>11</b> ) in C <sub>5</sub> D <sub>5</sub> N .. | 47 |

|                                                                                                                                                                                                                                                                                   |    |
|-----------------------------------------------------------------------------------------------------------------------------------------------------------------------------------------------------------------------------------------------------------------------------------|----|
| <b>Figure S87.</b> HSQC spectrum of chantriolide P ( <b>11</b> ) in C <sub>5</sub> D <sub>5</sub> N.....                                                                                                                                                                          | 48 |
| <b>Figure S88.</b> <sup>1</sup> H- <sup>1</sup> H COSY spectrum of chantriolide P ( <b>11</b> ) in C <sub>5</sub> D <sub>5</sub> N .....                                                                                                                                          | 48 |
| <b>Figure S89.</b> HMBC spectrum of chantriolide P ( <b>11</b> ) in C <sub>5</sub> D <sub>5</sub> N.....                                                                                                                                                                          | 49 |
| <b>Figure S90.</b> ROESY spectrum of chantriolide P ( <b>11</b> ) in C <sub>5</sub> D <sub>5</sub> N.....                                                                                                                                                                         | 49 |
| <b>Figure S91.</b> <sup>1</sup> H NMR (500 MHz) spectrum of plantagiolide E ( <b>12</b> ) in C <sub>5</sub> D <sub>5</sub> N .....                                                                                                                                                | 50 |
| <b>Figure S92.</b> <sup>13</sup> C and DEPT-135 NMR (125 MHz) spectra of plantagiolide E ( <b>12</b> ) in C <sub>5</sub> D <sub>5</sub> N                                                                                                                                         | 50 |
| <b>Figure S93.</b> <sup>1</sup> H NMR (500 MHz) spectrum of plantagiolide C ( <b>13</b> ) in C <sub>5</sub> D <sub>5</sub> N.....                                                                                                                                                 | 51 |
| <b>Figure S94.</b> <sup>13</sup> C and DEPT-135 NMR (125 MHz) spectra of plantagiolide C ( <b>13</b> ) in C <sub>5</sub> D <sub>5</sub> N                                                                                                                                         | 51 |
| <b>Figure S95.</b> <sup>1</sup> H NMR (400 MHz) spectrum of plantagiolide B ( <b>14</b> ) in DMSO- <i>d</i> <sub>6</sub> .....                                                                                                                                                    | 52 |
| <b>Figure S96.</b> <sup>13</sup> C and DEPT-135 NMR (125 MHz) spectra of plantagiolide B ( <b>14</b> ) DMSO- <i>d</i> <sub>6</sub><br>.....                                                                                                                                       | 52 |
| <b>Figure S97.</b> <sup>1</sup> H NMR (400 MHz) spectrum of plantagiolide A ( <b>15</b> ) in C <sub>5</sub> D <sub>5</sub> N .....                                                                                                                                                | 53 |
| <b>Figure S98.</b> <sup>13</sup> C and DEPT-135 NMR (125 MHz) spectra of plantagiolide A ( <b>15</b> ) in C <sub>5</sub> D <sub>5</sub> N                                                                                                                                         | 53 |
| <b>Figure S99.</b> <sup>1</sup> H NMR (500 MHz) spectrum of plantagiolide M ( <b>16</b> ) in CD <sub>3</sub> OD.....                                                                                                                                                              | 54 |
| <b>Figure S100.</b> <sup>13</sup> C and DEPT-135 NMR (125 MHz) spectra of plantagiolide M ( <b>16</b> ) in CD <sub>3</sub> OD<br>.....                                                                                                                                            | 54 |
| <b>Figure S101.</b> <sup>1</sup> H NMR (400 MHz) spectrum of chantriolide D ( <b>17</b> ) in C <sub>5</sub> D <sub>5</sub> N .....                                                                                                                                                | 55 |
| <b>Figure S102.</b> <sup>13</sup> C and DEPT-135 NMR (125 MHz) spectra of chantriolide D ( <b>17</b> ) in C <sub>5</sub> D <sub>5</sub> N                                                                                                                                         | 55 |
| <b>Figure S103.</b> Cytotoxicity of compounds <b>1–17</b> on AML-12 hepatocytes. AML-12 cells were<br>treated with different compounds at indicated concentrations for 24 hours. Data are shown as<br>mean ± S.D., n = 3. * <i>P</i> < 0.05 and ** <i>P</i> < 0.01 vs. DMSO. .... | 56 |



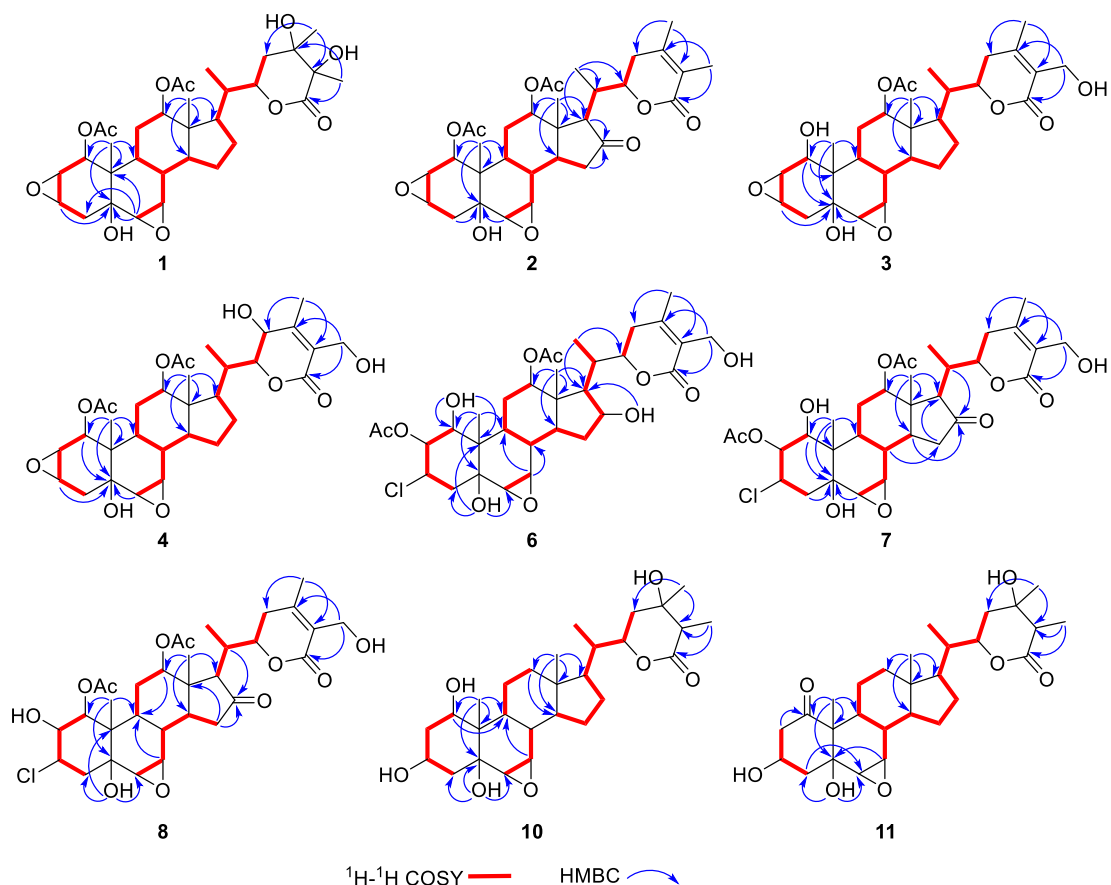

**Figure S1.** Key  $^1\text{H}$ - $^1\text{H}$  COSY and HMBC correlations of compounds 1–4, 6–8, 10, and 11.

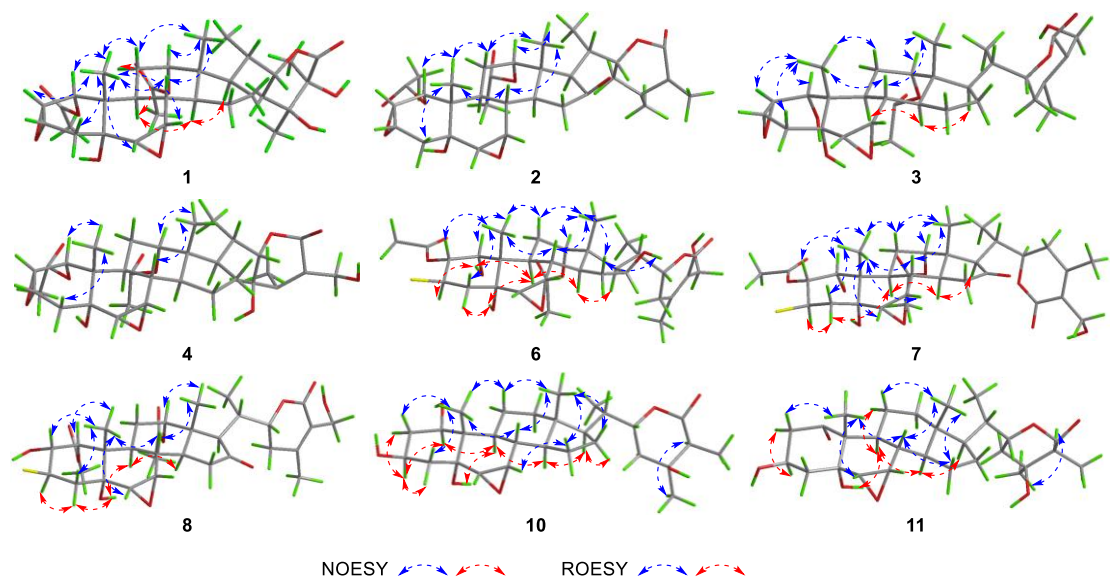

**Figure S2.** NOESY correlations of compounds 1–3 and ROESY correlations of compounds 4, 6–8, 10, and 11.

# Elemental Composition Report

## Single Mass Analysis

Tolerance = 10.0 PPM / DBE: min = -1.5, max = 50.0

Element prediction: Off

Number of isotope peaks used for i-FIT = 3

Monoisotopic Mass, Even Electron Ions

104 formula(e) evaluated with 3 results within limits (up to 10 best isotopic matches for each mass)

Elements Used:

C: 0-50 H: 0-60 O: 0-20

Minimum: -1.5

Maximum: 5.0 10.0 50.0

| Mass     | Calc. Mass | mDa | PPM | DBE  | i-FIT | Norm  | Conf(%) | Formula     |
|----------|------------|-----|-----|------|-------|-------|---------|-------------|
| 651.3023 | 651.3017   | 0.6 | 0.9 | 10.5 | 592.1 | 0.232 | 79.31   | C33 H47 O13 |

JGS-B2J1B2  
20210123-YY-B2J1B2 1115 (4.600)

1: TOF MS ES-  
5.42e+005

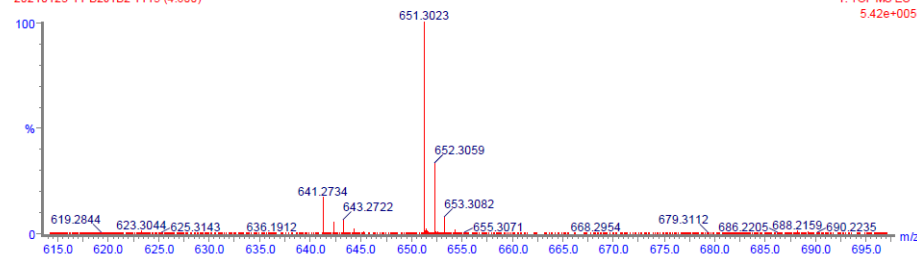

**Figure S3.** HRESIMS spectrum of chantriolide F (1)

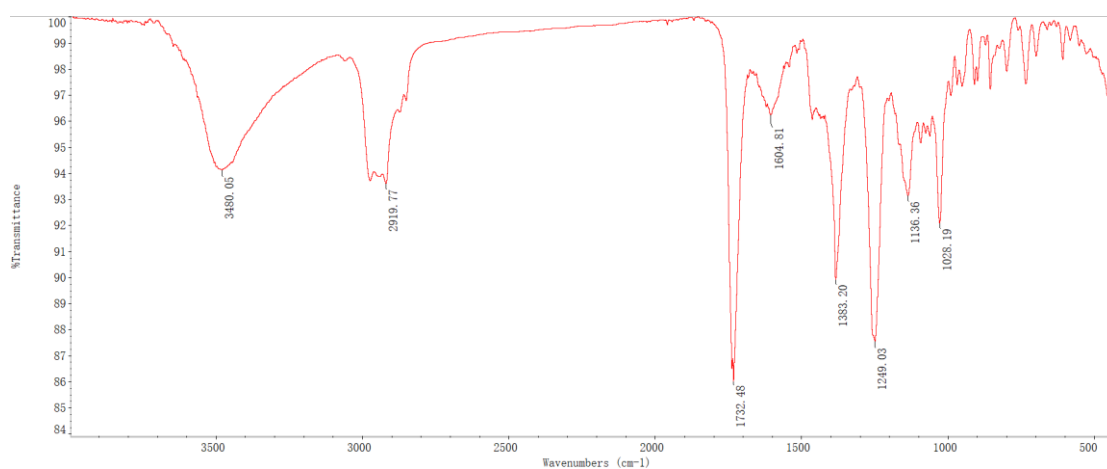

**Figure S4.** IR spectrum of chantriolide F (1)

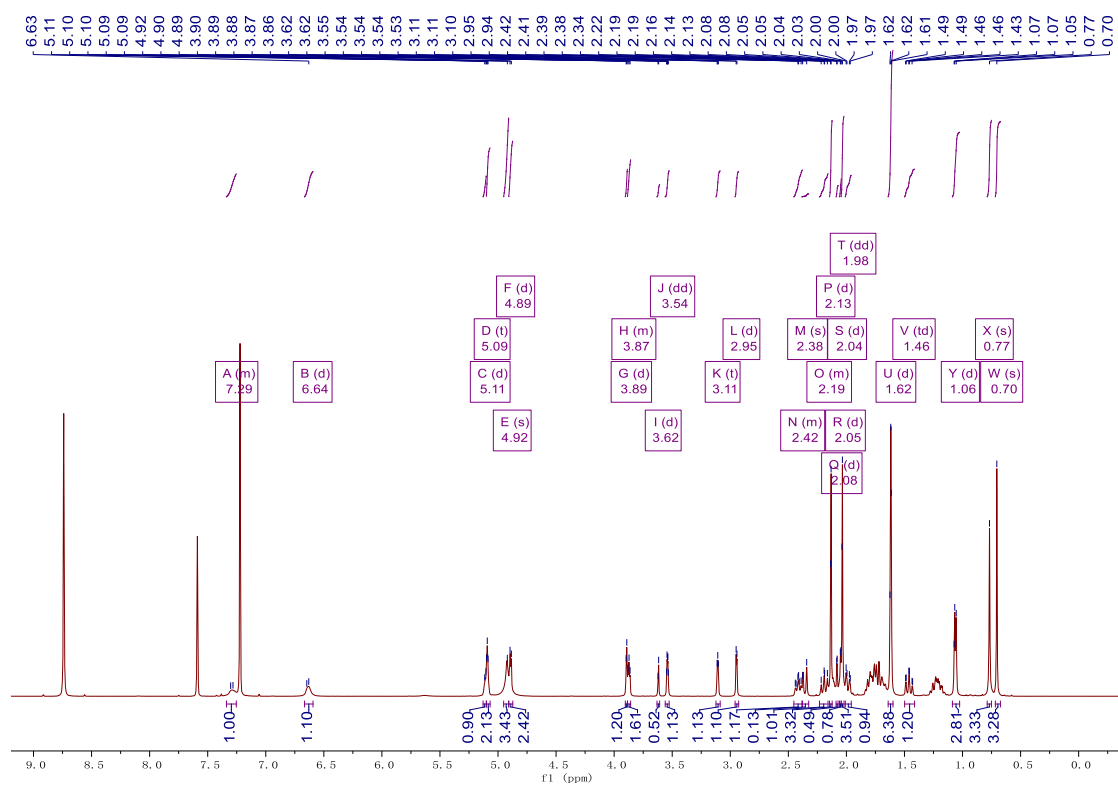

**Figure S5.  $^1\text{H}$  NMR (500 MHz) spectrum of chantriolide F (1) in  $\text{C}_5\text{D}_5\text{N}$**

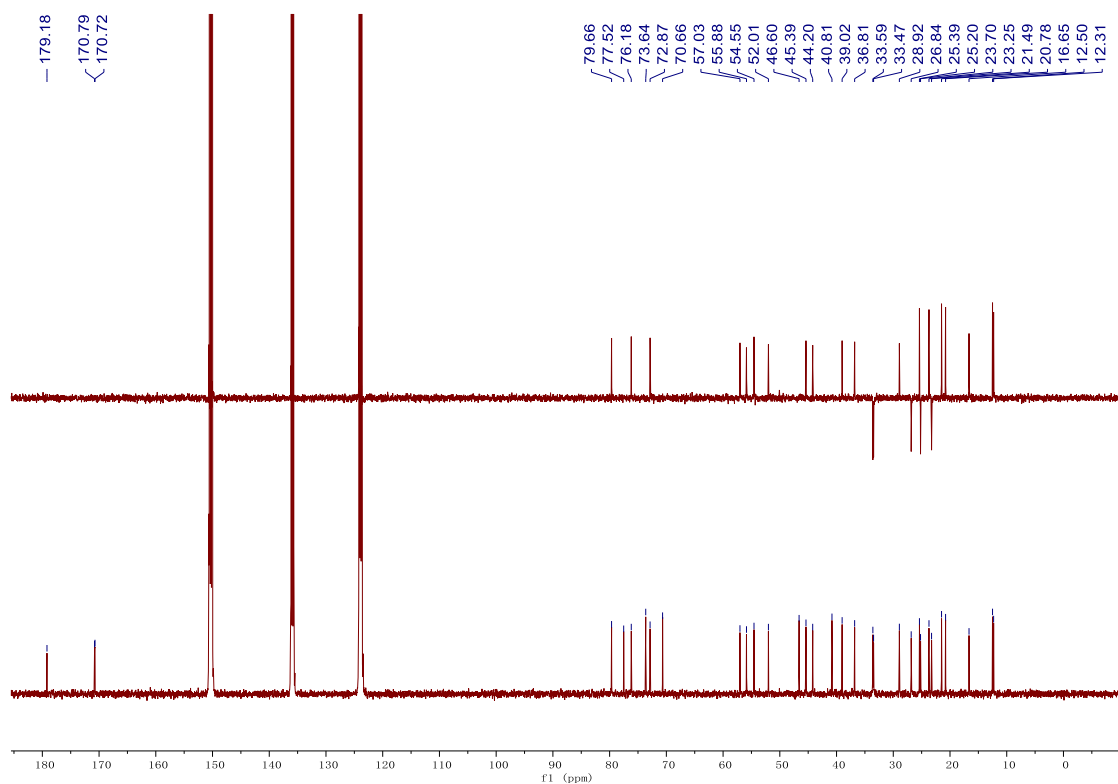

**Figure S6.  $^{13}\text{C}$  and DEPT-135 NMR (125 MHz) spectra of chantriolide F (1) in  $\text{C}_5\text{D}_5\text{N}$**

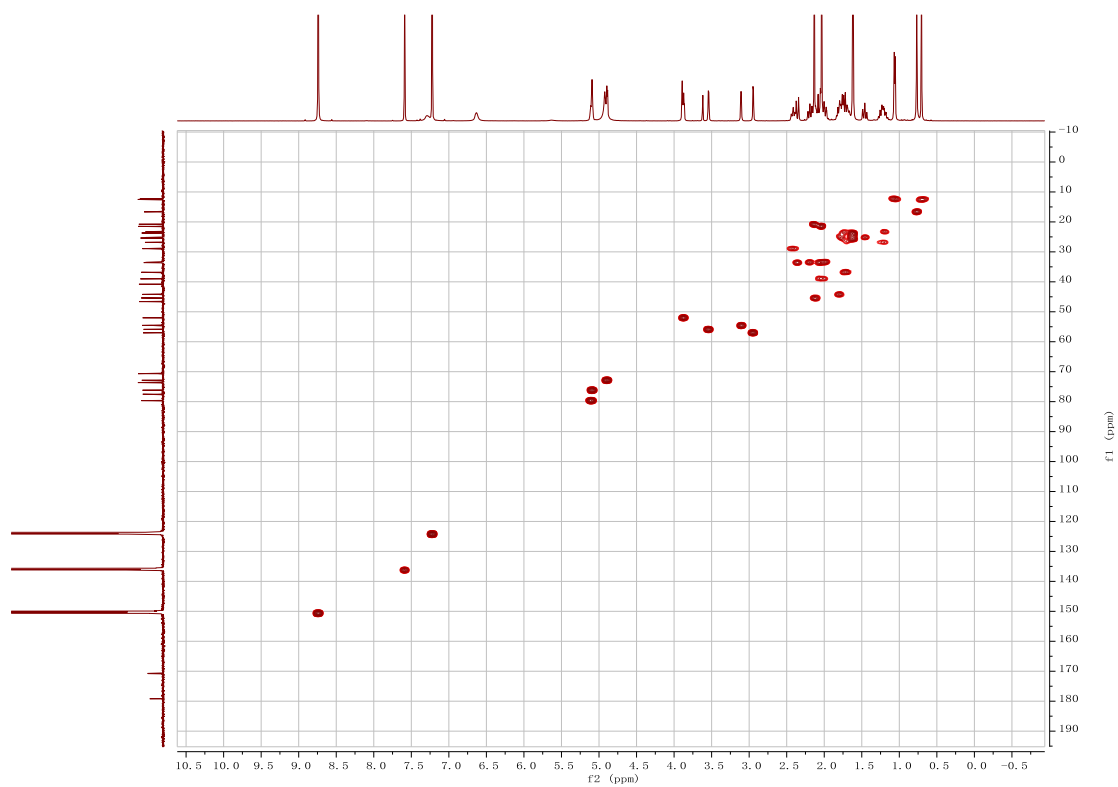

**Figure S7.** HSQC spectrum of chantriolide F (**1**) in  $C_5D_5N$

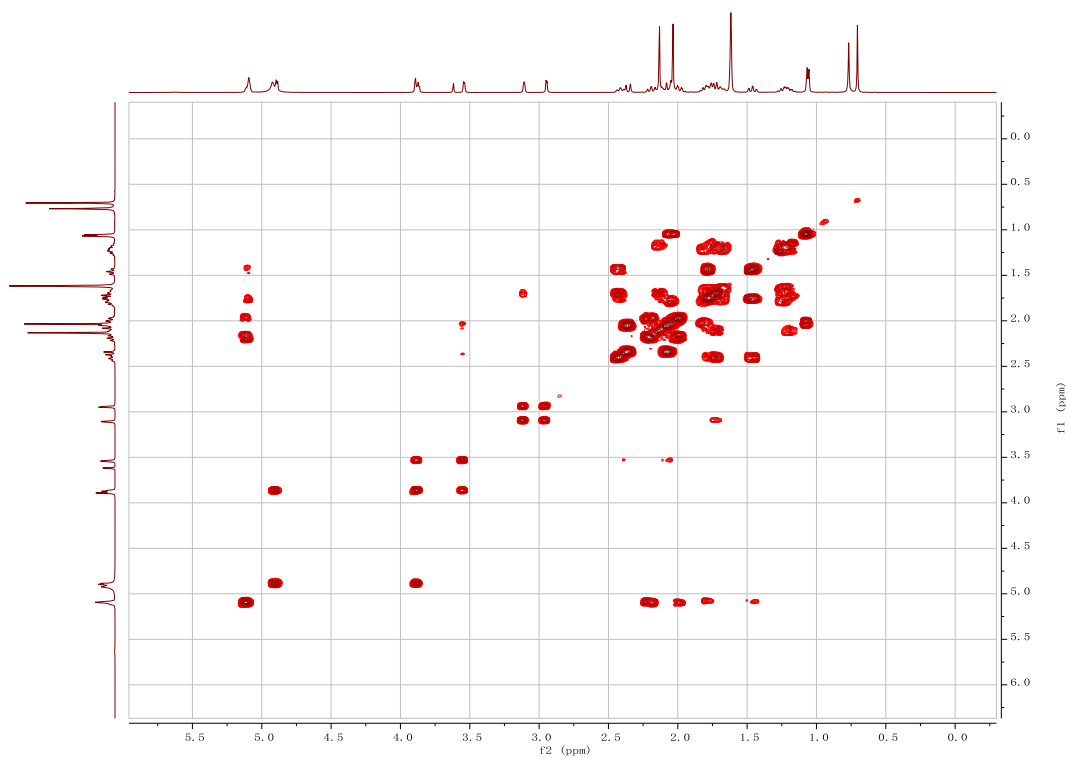

**Figure S8.**  $^1H$ - $^1H$  COSY spectrum of chantriolide F (**1**) in  $C_5D_5N$

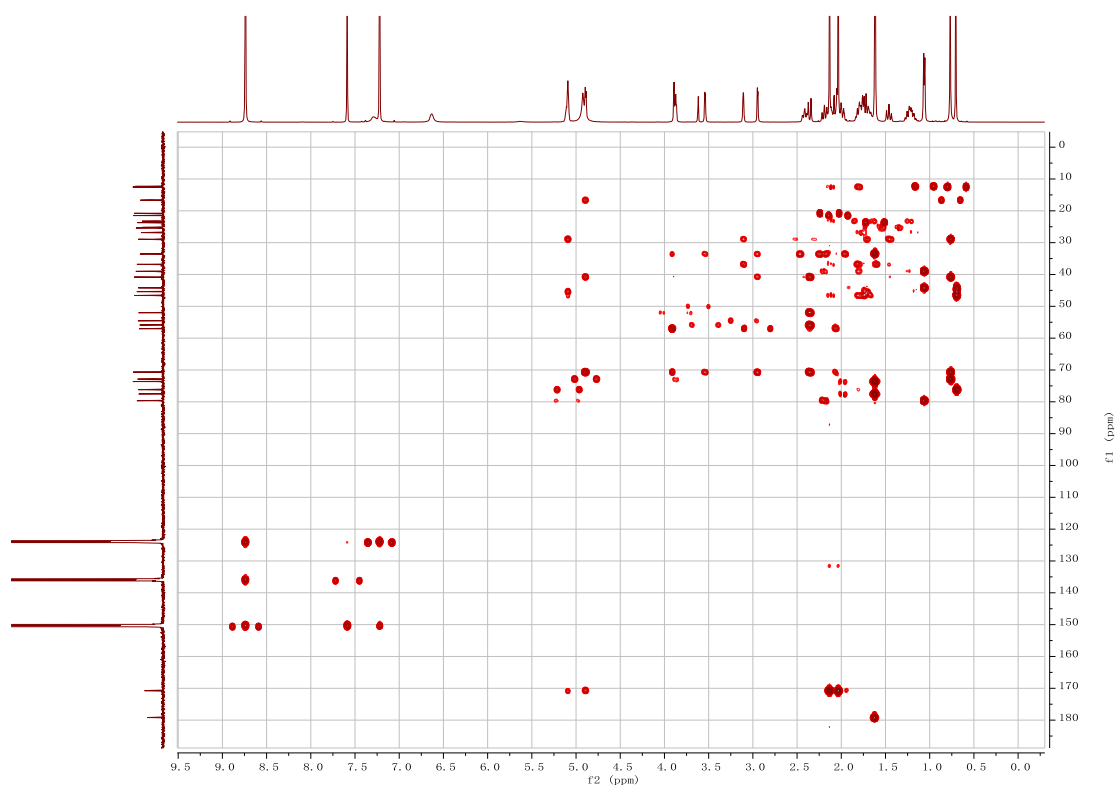

**Figure S9.** HMBC spectrum of chantriolide F (**1**) in C<sub>5</sub>D<sub>5</sub>N

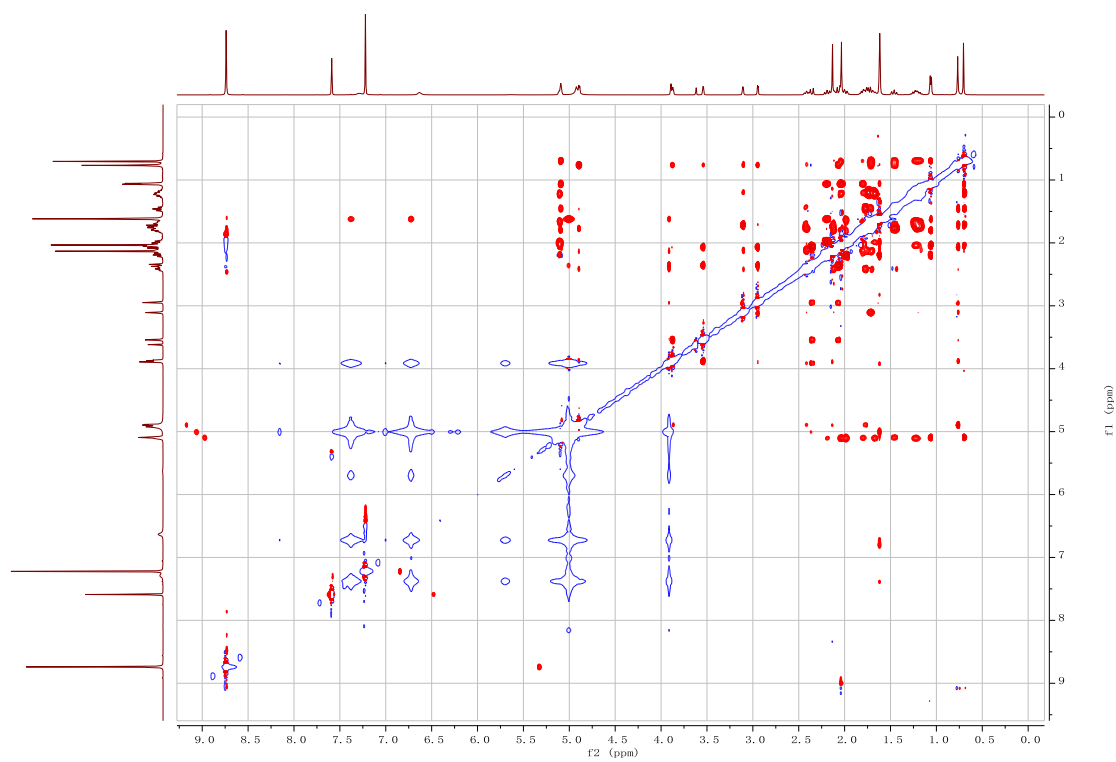

**Figure S10.** NOESY spectrum of chantriolide F (**1**) in C<sub>5</sub>D<sub>5</sub>N

# Elemental Composition Report

Tolerance = 5.0 PPM / DBE: min = -1.5, max = 50.0

Element prediction: Off

Number of isotope peaks used for i-FIT = 3

Monoisotopic Mass, Even Electron Ions

104 formula(e) evaluated with 1 results within limits (up to 50 best isotopic matches for each mass)

Elements Used:

C: 0-34 H: 0-200 O: 0-30

Minimum:

Maximum:

| Mass     | RA     | Calc. Mass | mDa | PPM | DBE  | i-FIT | Norm | Conf(%) | Formula     |
|----------|--------|------------|-----|-----|------|-------|------|---------|-------------|
| 587.2865 | 100.00 | 587.2856   | 0.9 | 1.5 | 11.5 | 518.4 | n/a  | n/a     | C32 H43 O10 |

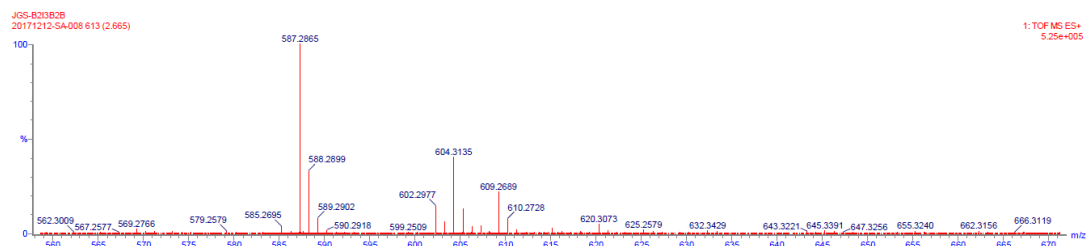

**Figure S11.** HRESIMS spectrum of chantriolide G (2)

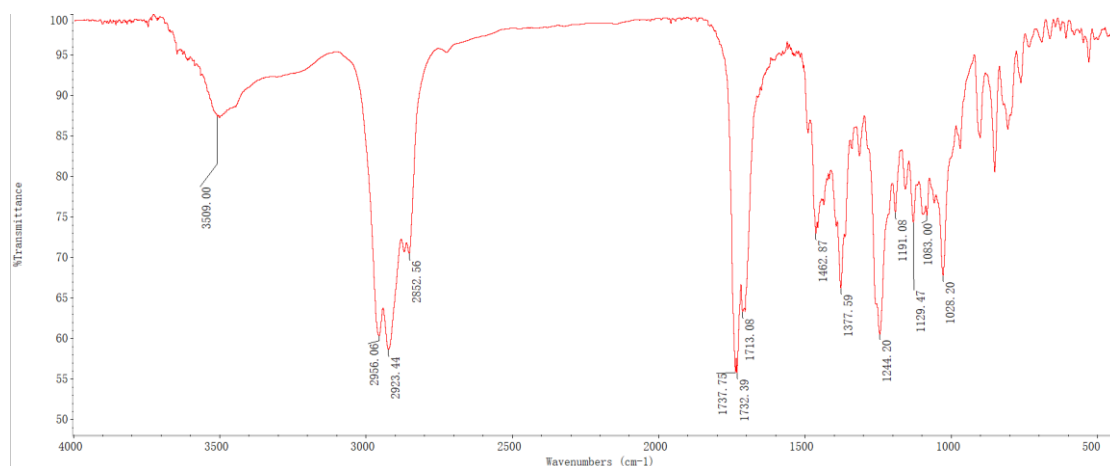

**Figure S12.** IR spectrum of chantriolide G (2)

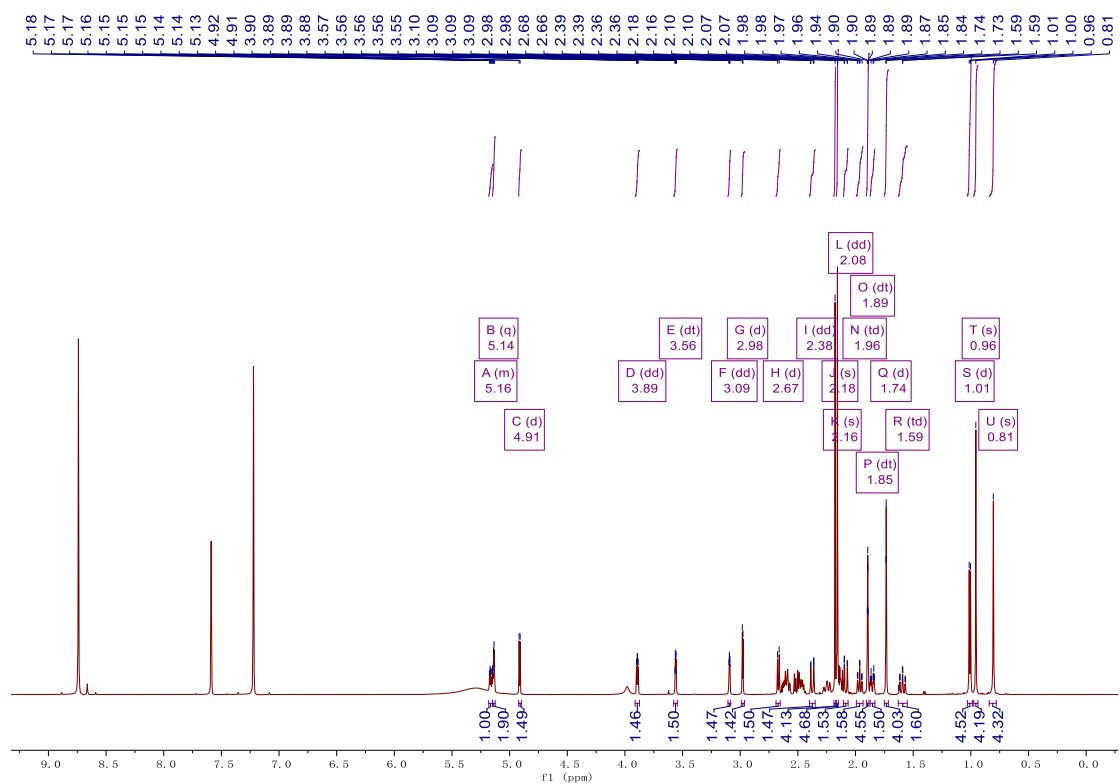

**Figure S13.  $^1\text{H}$  NMR (600 MHz) spectrum of chantriolide G (2) in  $\text{C}_5\text{D}_5\text{N}$**

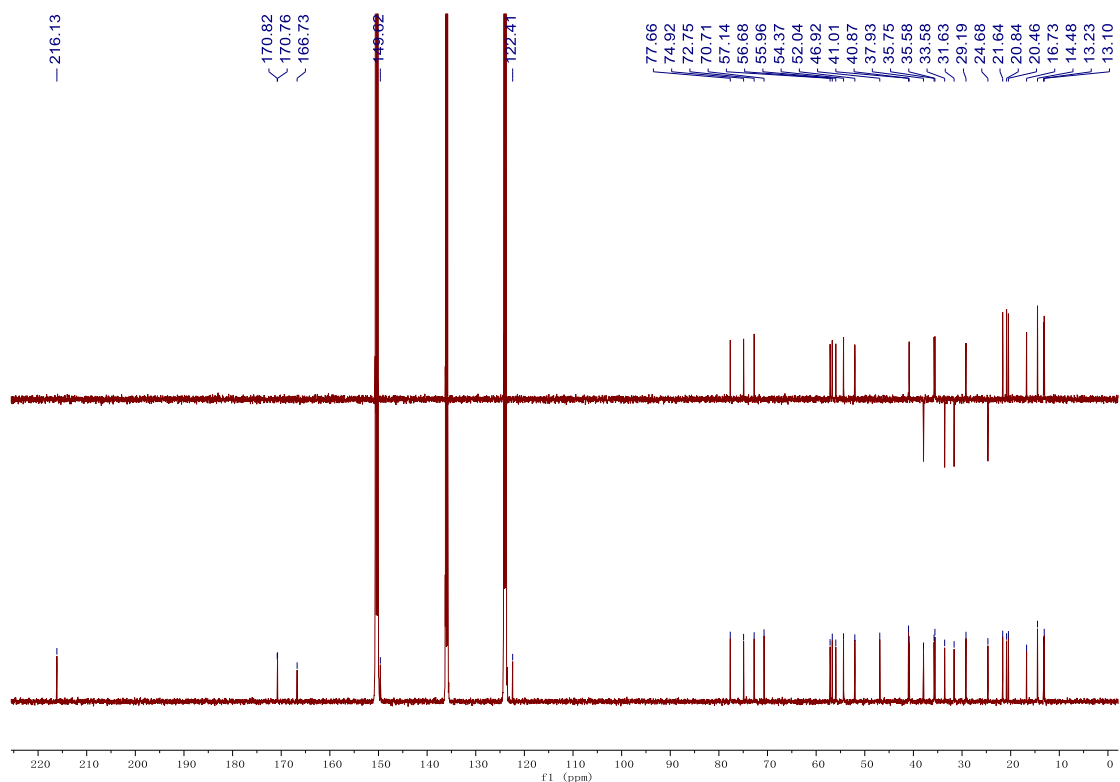

**Figure S14.  $^{13}\text{C}$  and DEPT-135 NMR (125 MHz) spectra of chantriolide G (2) in  $\text{C}_5\text{D}_5\text{N}$**

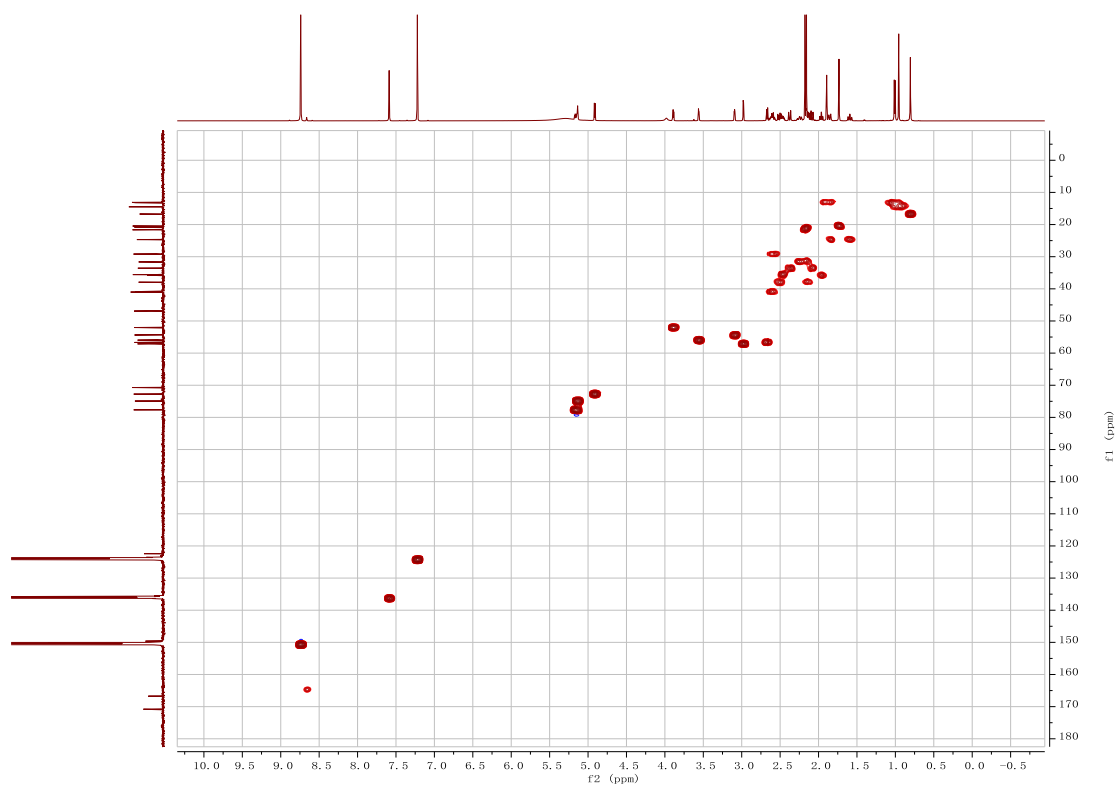

**Figure S15.** HSQC spectrum of chantriolide G (**2**) in  $C_5D_5N$

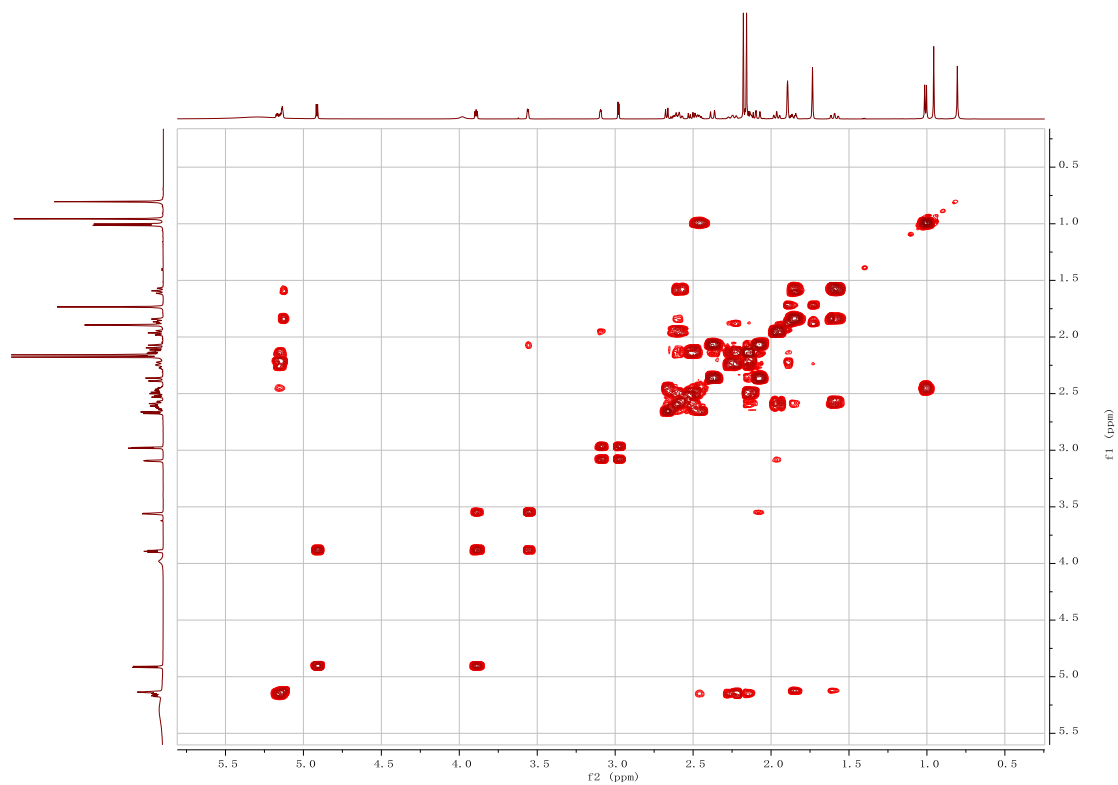

**Figure S16.**  $^1H$ - $^1H$  COSY spectrum of chantriolide G (**2**) in  $C_5D_5N$



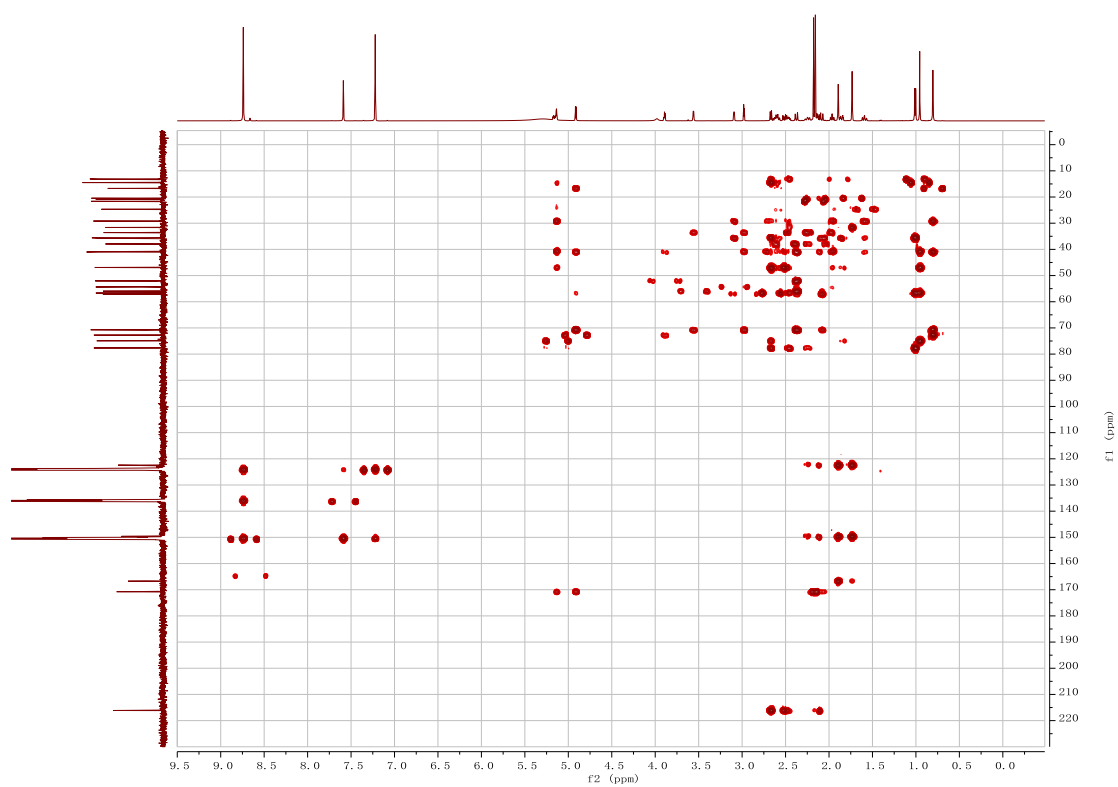

**Figure S17.** HMBC spectrum of chantriolide G (**2**) in C<sub>5</sub>D<sub>5</sub>N

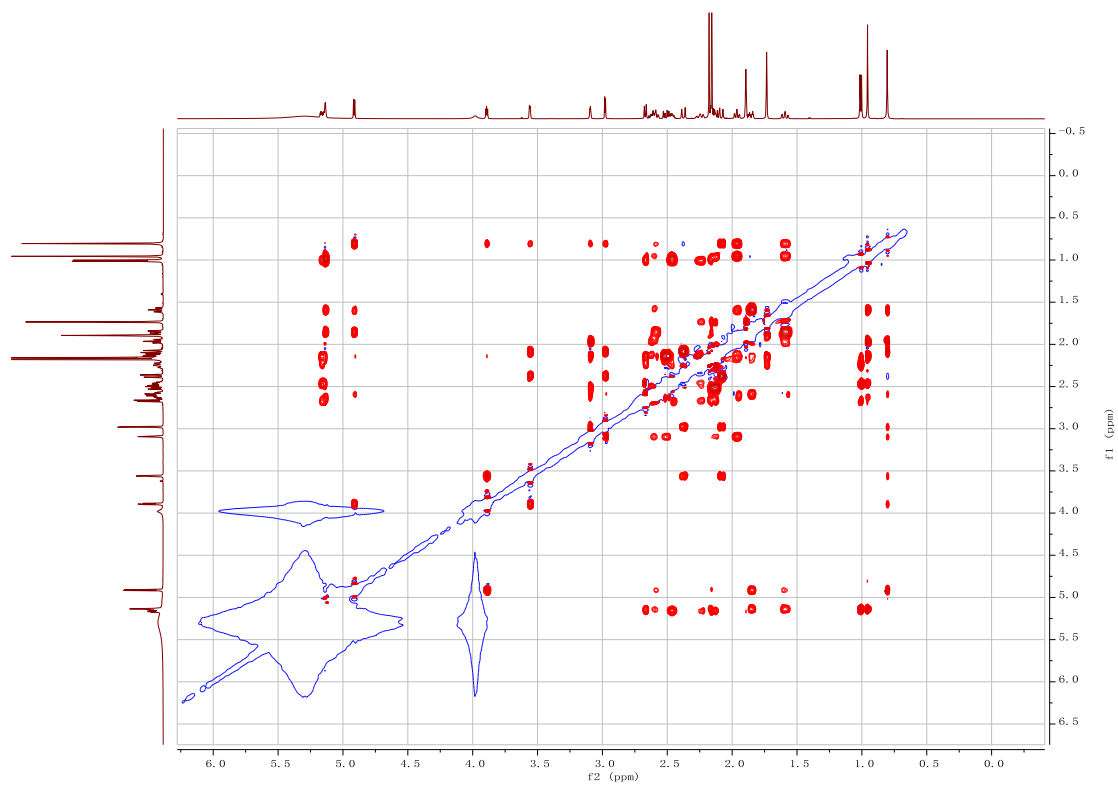

**Figure S18.** NOESY spectrum of chantriolide G (**2**) in C<sub>5</sub>D<sub>5</sub>N

# Elemental Composition Report

Tolerance = 5.0 PPM / DBE: min = -1.5, max = 50.0

Element prediction: Off

Number of isotope peaks used for i-FIT = 3

Monoisotopic Mass, Even Electron Ions

105 formula(e) evaluated with 1 results within limits (up to 50 best isotopic matches for each mass)

Elements Used:

C: 0-34 H: 0-200 O: 0-30

Minimum: 80.00 -1.5

Maximum: 100.00 5.0 5.0 50.0

| Mass     | RA     | Calc. Mass | mDa | PPM | DBE | i-FIT | Norm | Conf(%) | Formula    |
|----------|--------|------------|-----|-----|-----|-------|------|---------|------------|
| 547.2914 | 100.00 | 547.2907   | 0.7 | 1.3 | 9.5 | 525.0 | n/a  | n/a     | C30 H43 O9 |

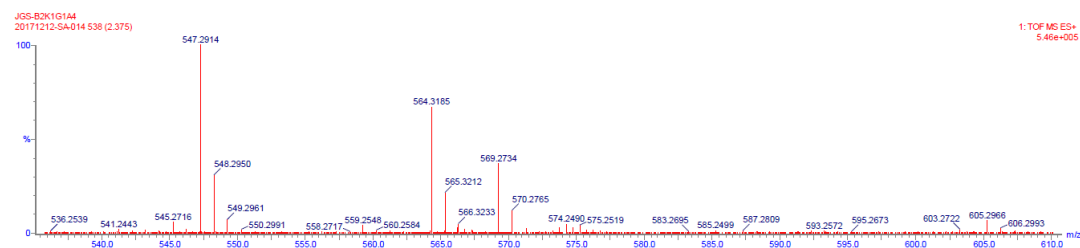

**Figure S19.** HRESIMS spectrum of chantriolide H (3)

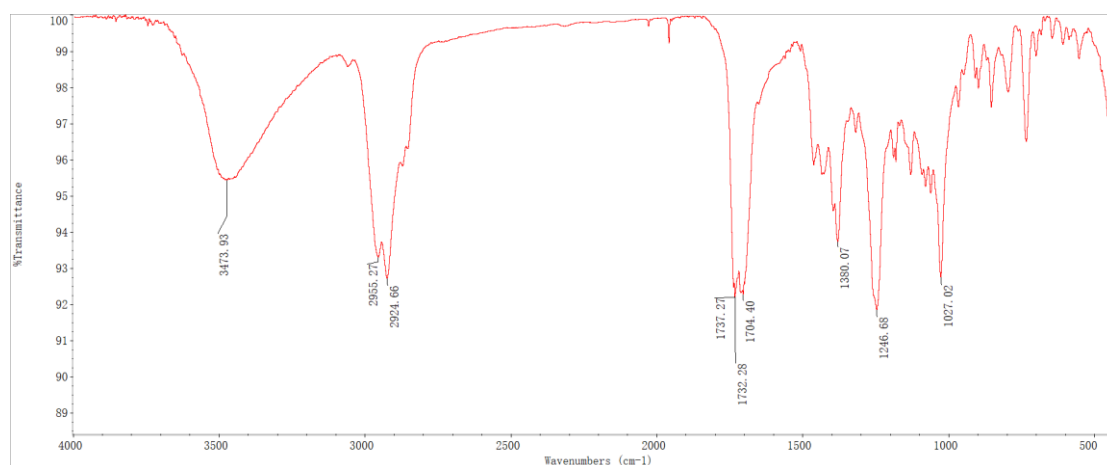

**Figure S20.** IR spectrum of chantriolide H (3)

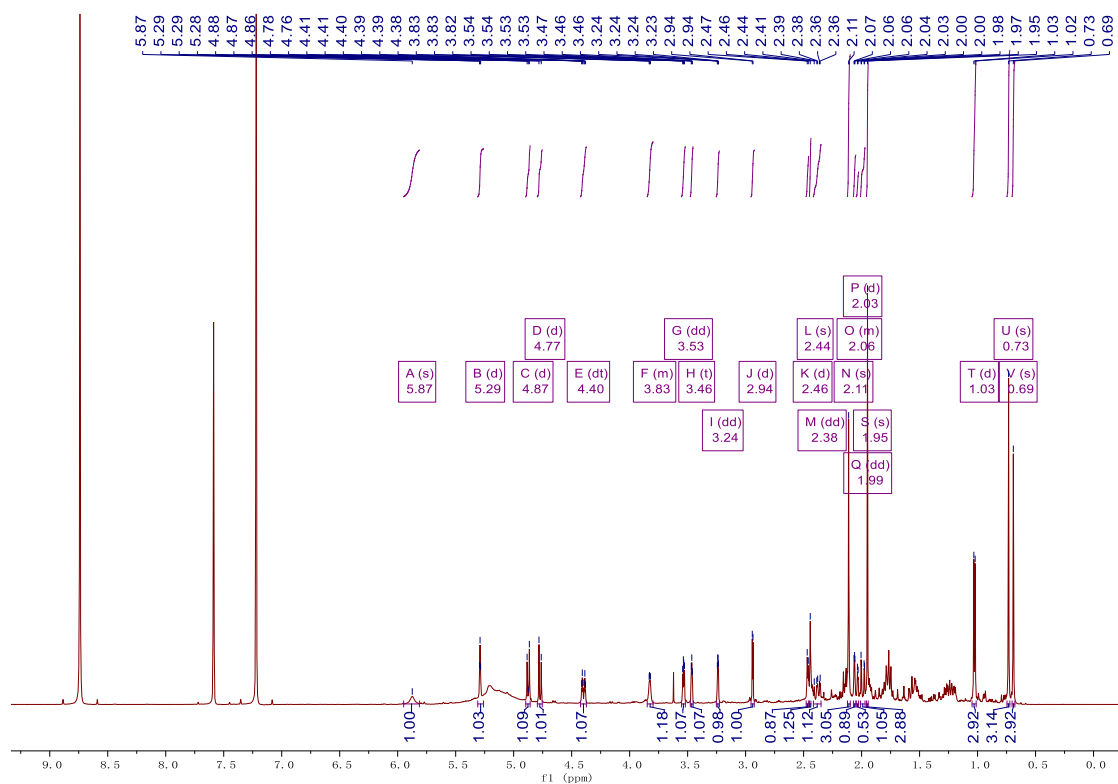

**Figure S21.**  $^1\text{H}$  NMR (600 MHz) spectrum of chantrolide H (**3**) in  $\text{C}_5\text{D}_5\text{N}$

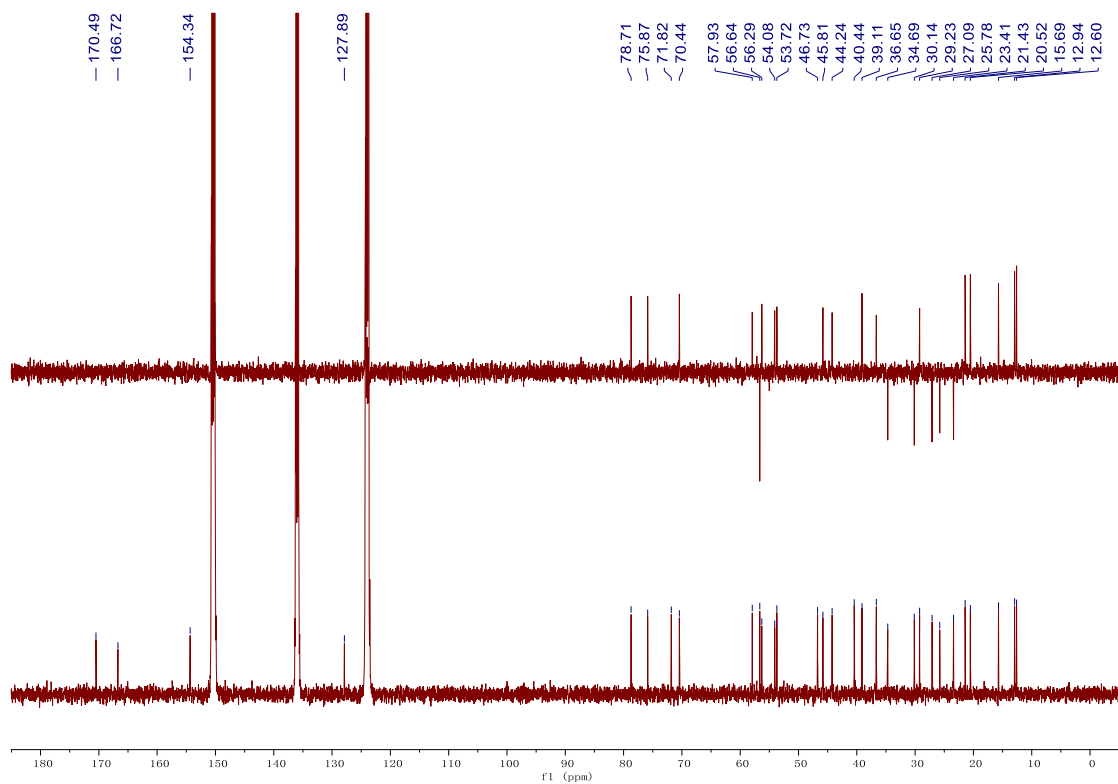

**Figure S22.**  $^{13}\text{C}$  and DEPT-135 NMR (125 MHz) spectra of chantrolide H (**3**) in  $\text{C}_5\text{D}_5\text{N}$

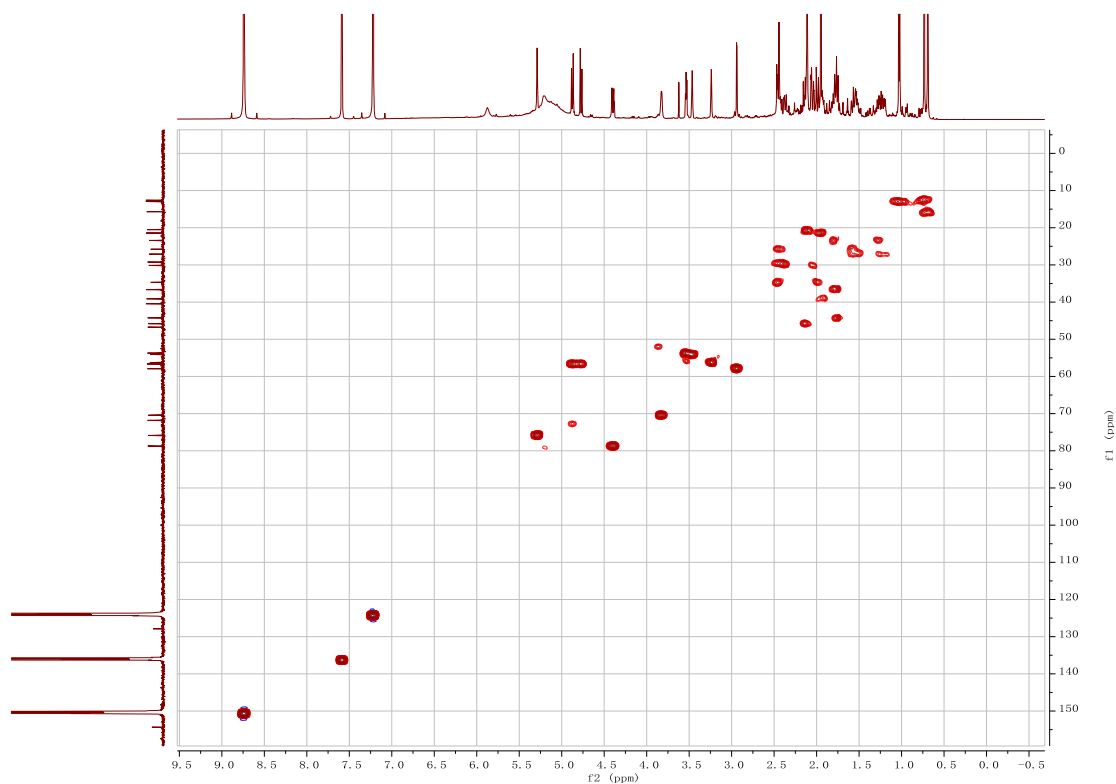

**Figure S23.** HSQC spectrum of chantriolide H (**3**) in  $C_5D_5N$

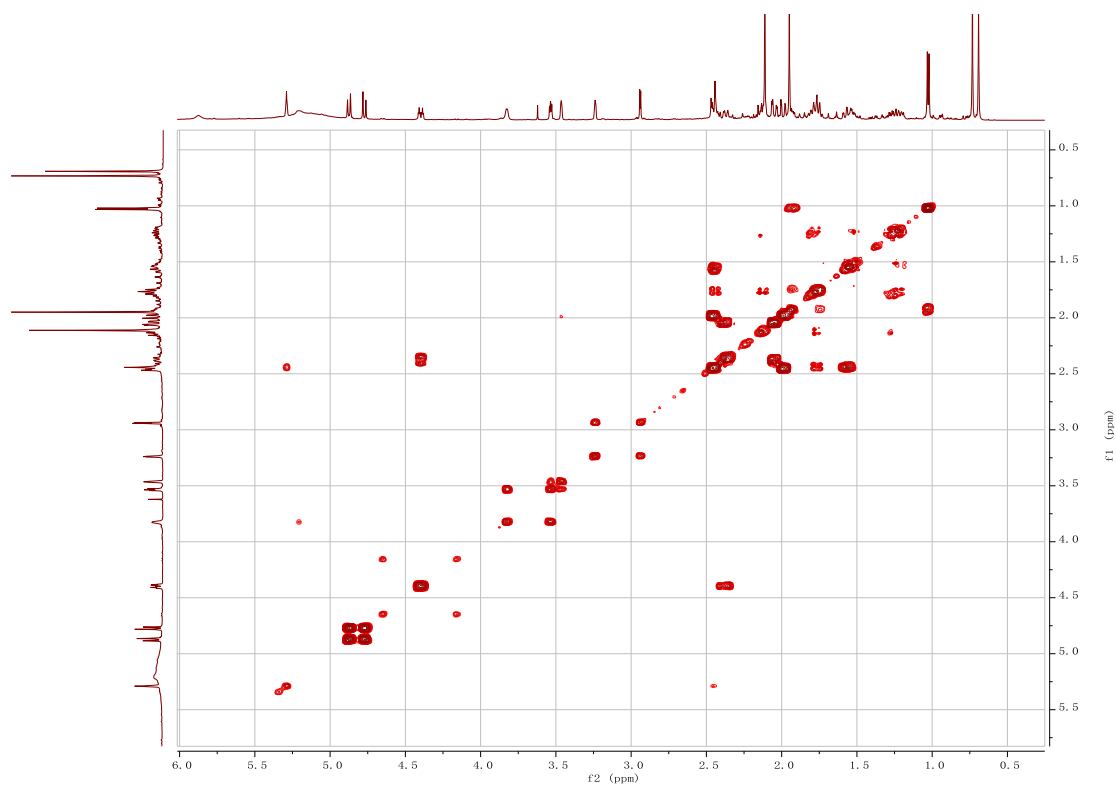

**Figure S24.**  $^1H$ - $^1H$  COSY spectrum of chantriolide H (**3**) in  $C_5D_5N$

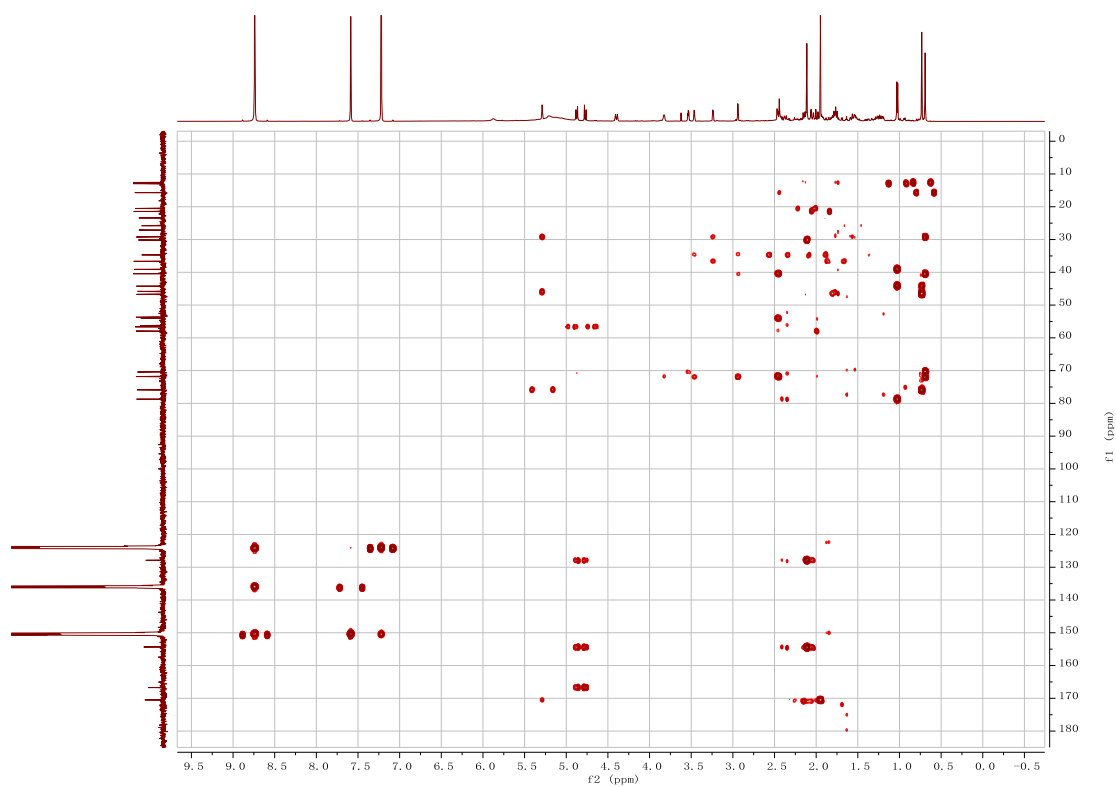

**Figure S25.** HMBC spectrum of chantriolide H (**3**) in  $C_5D_5N$

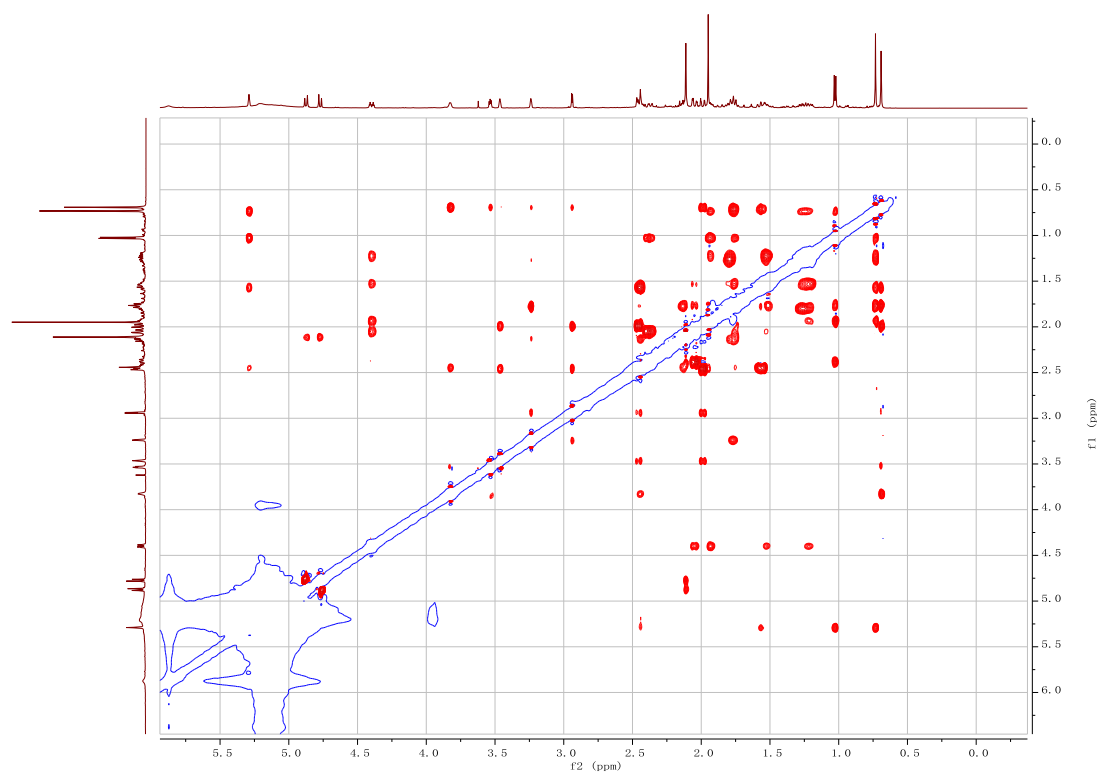

**Figure S26.** NOESY spectrum of chantriolide H (**3**) in  $C_5D_5N$

# Elemental Composition Report

Tolerance = 5.0 PPM / DBE: min = -1.5, max = 50.0

Element prediction: Off

Number of isotope peaks used for i-FIT = 3

Monoisotopic Mass, Even Electron Ions

196 formula(e) evaluated with 1 results within limits (up to 50 best isotopic matches for each mass)

Elements Used:

C: 0-34 H: 0-200 N: 0-1 O: 0-30

Minimum: 80.00 -1.5

Maximum: 100.00 5.0 5.0 50.0

| Mass     | RA     | Calc. Mass | mDa | PPM | DBE | i-FIT | Norm | Conf(%) | Formula       |
|----------|--------|------------|-----|-----|-----|-------|------|---------|---------------|
| 622.3237 | 100.00 | 622.3227   | 1.0 | 1.6 | 9.5 | 475.6 | n/a  | n/a     | C32 H48 N O11 |

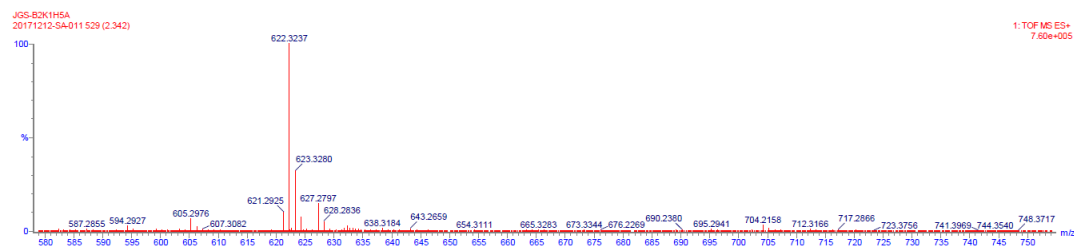

**Figure S27.** HRESIMS spectrum of chantriolide I (4)

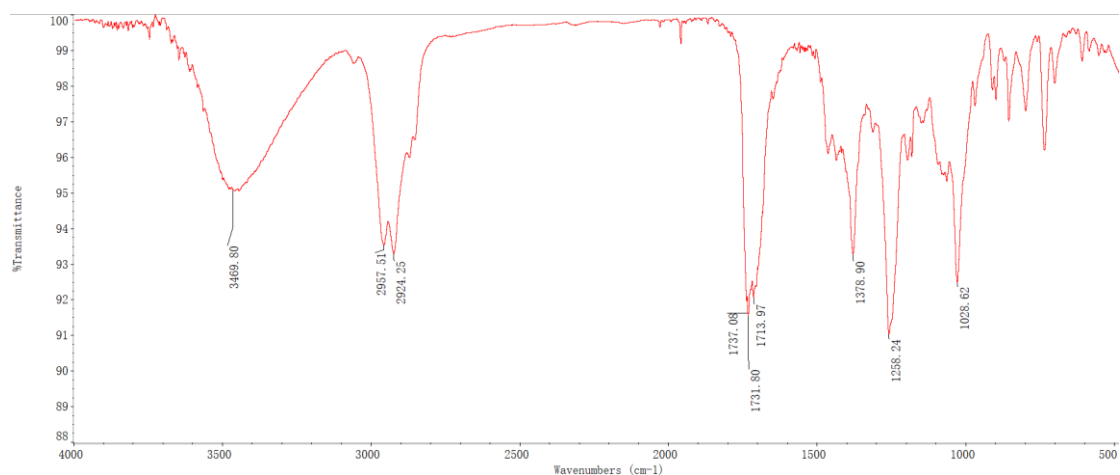

**Figure S28.** IR spectrum of chantriolide I (4)

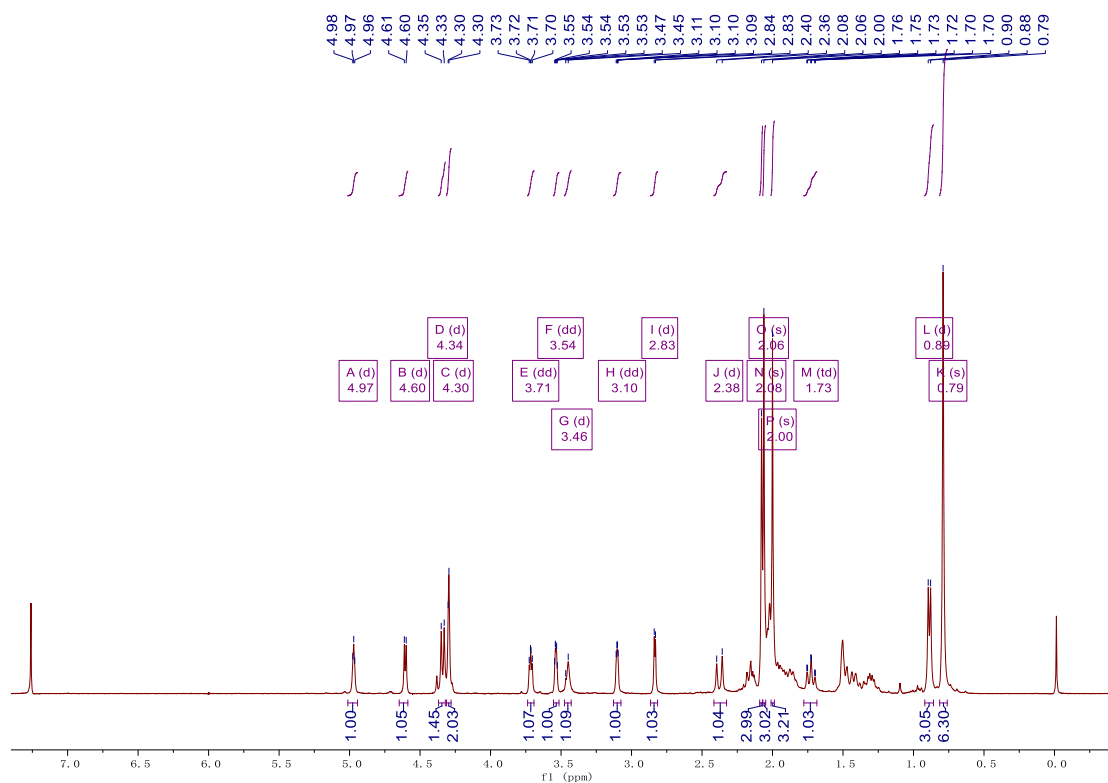

**Figure S29.** <sup>1</sup>H NMR (400 MHz) spectrum of chantriolide I (**4**) in CDCl<sub>3</sub>

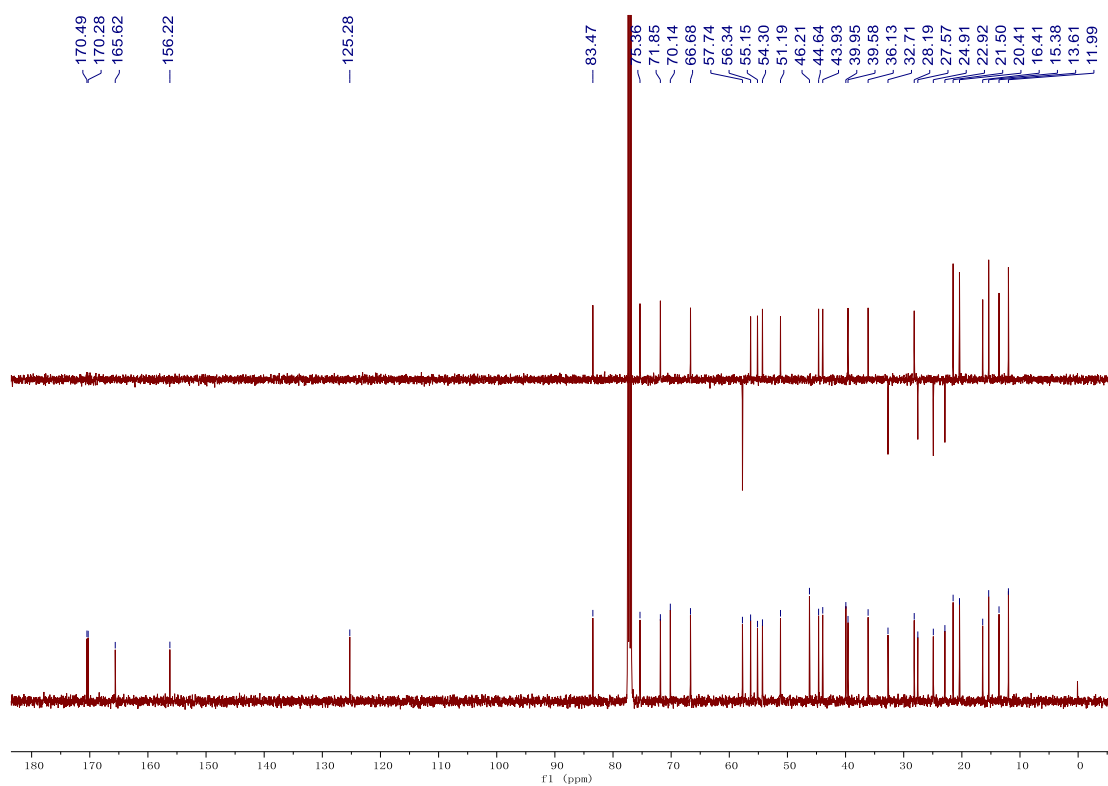

**Figure S30.** <sup>13</sup>C and DEPT-135 NMR (125 MHz) spectra of chantriolide I (**4**) in CDCl<sub>3</sub>

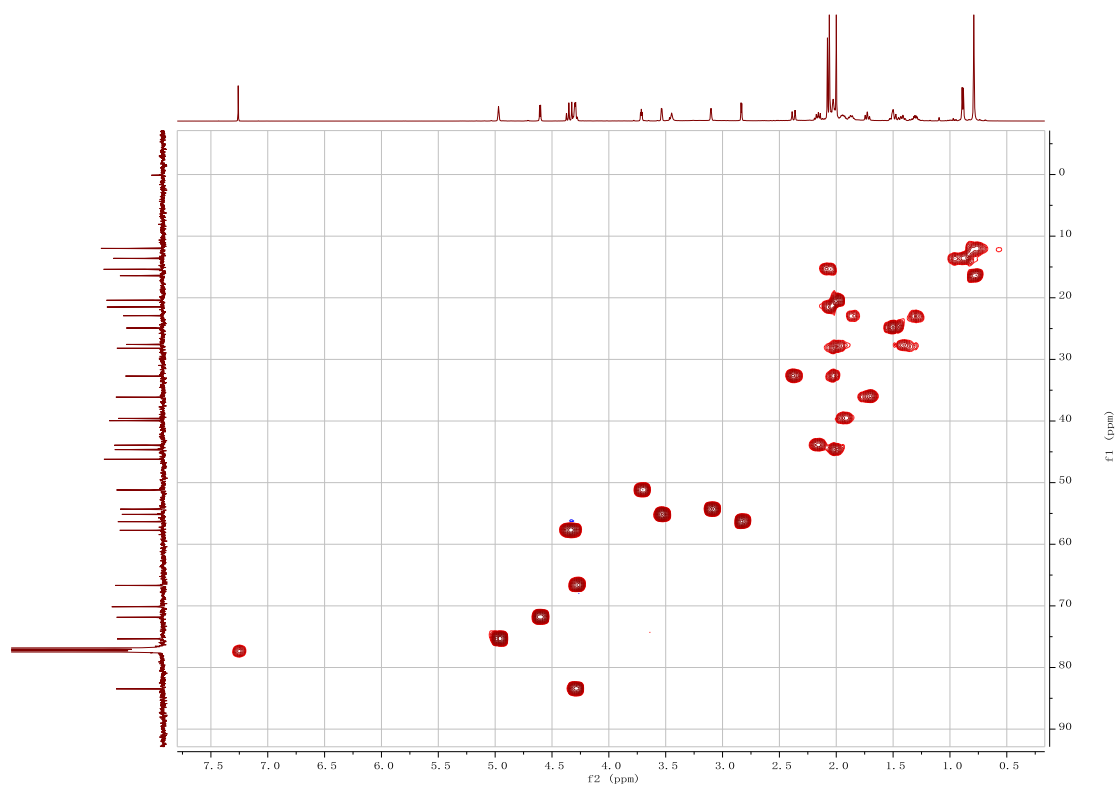

**Figure S31.** HSQC spectrum of chantriolide I (**4**) in  $\text{CDCl}_3$

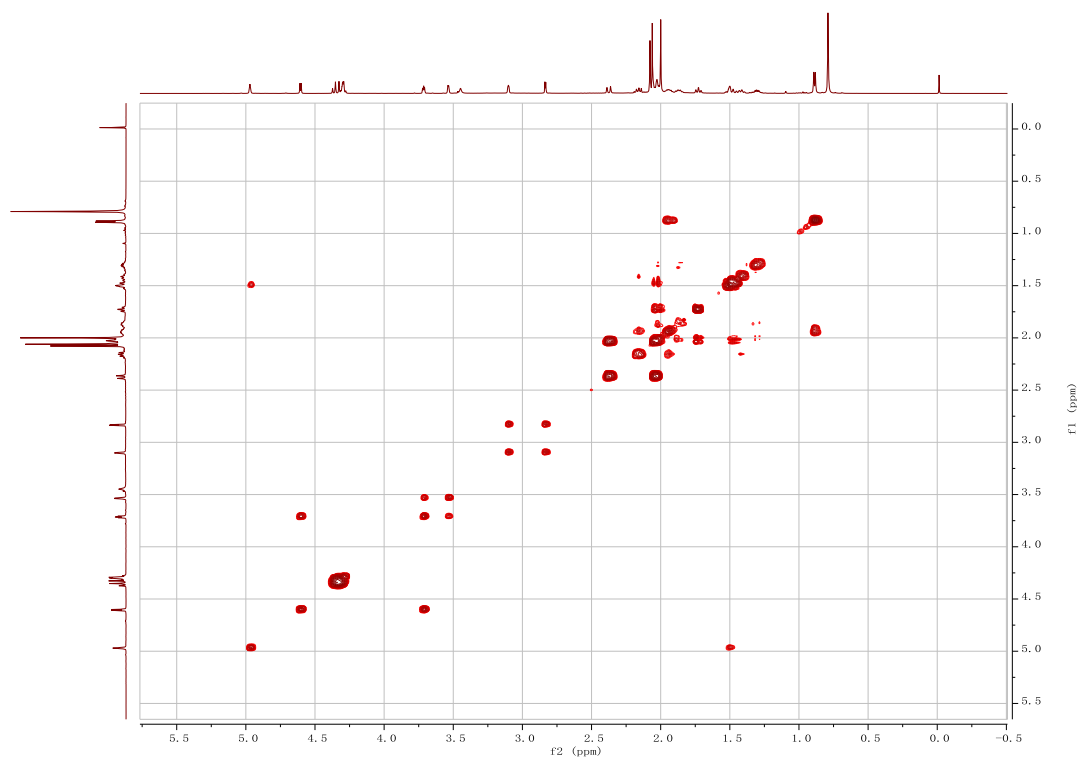

**Figure S32.**  $^1\text{H}$ - $^1\text{H}$  COSY spectrum of chantriolide I (**4**) in  $\text{CDCl}_3$



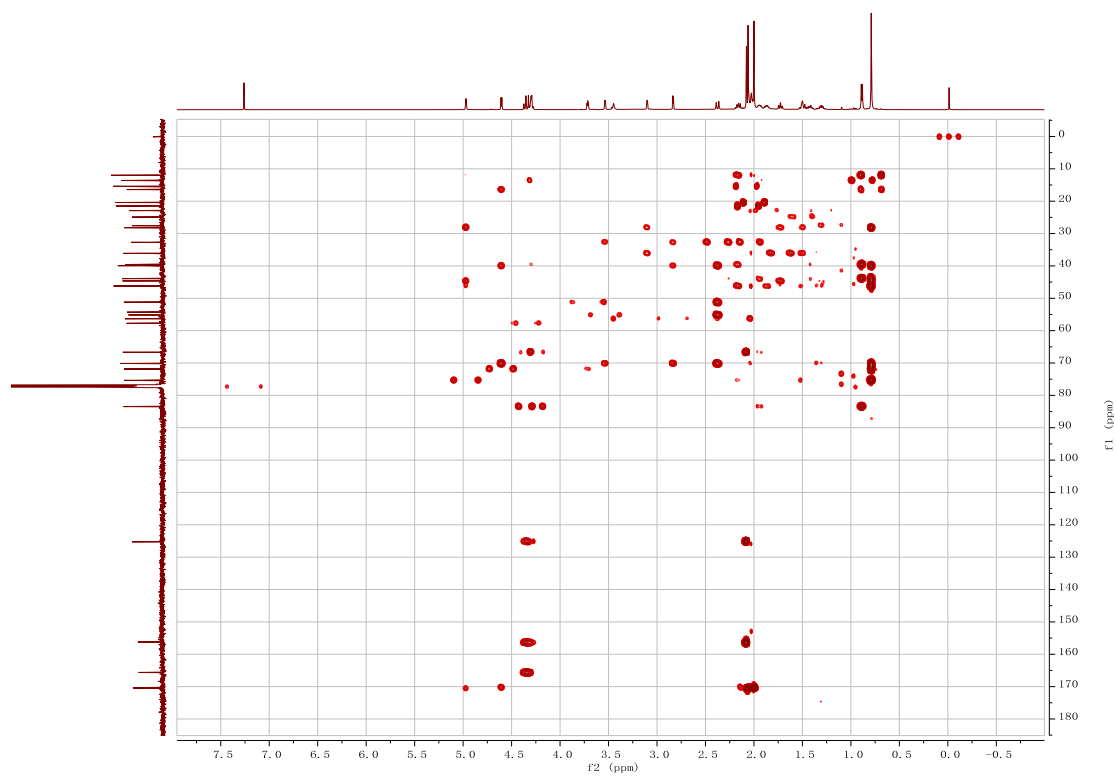

**Figure S33.** HMBC spectrum of chantriolide I (**4**) in  $\text{CDCl}_3$

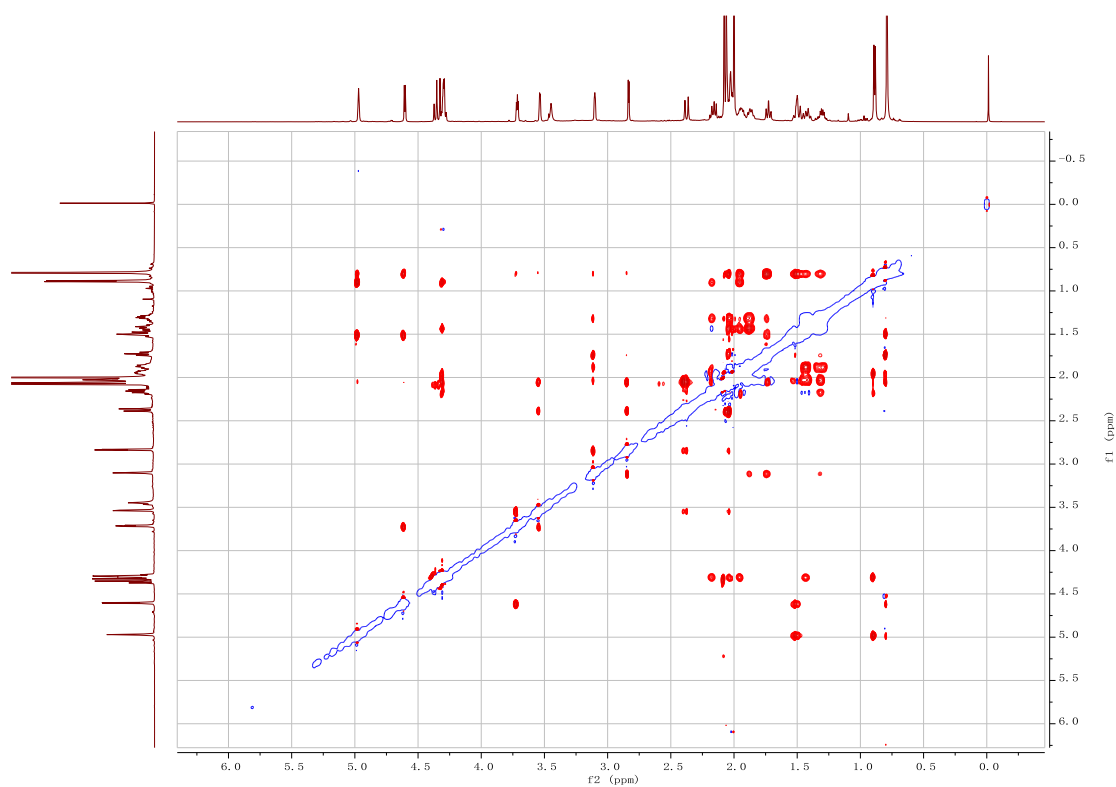

**Figure S34.** ROESY spectrum of chantriolide I (**4**) in  $\text{CDCl}_3$

# Elemental Composition Report

## Single Mass Analysis

Tolerance = 10.0 PPM / DBE: min = -1.5, max = 50.0

Element prediction: Off

Number of isotope peaks used for i-FIT = 3

Monoisotopic Mass, Even Electron Ions

161 formula(e) evaluated with 3 results within limits (up to 10 best isotopic matches for each mass)

Elements Used:

C: 30-50 H: 0-60 O: 0-20 Cl: 0-1

Minimum: -1.5

Maximum: 5.0 10.0 50.0

| Mass     | Calc. Mass | mDa | PPM | DBE  | i-FIT | Norm  | Conf(%) | Formula        |
|----------|------------|-----|-----|------|-------|-------|---------|----------------|
| 669.2689 | 669.2678   | 1.1 | 1.6 | 10.5 | 625.5 | 0.000 | 100.00  | C33 H46 O12 Cl |

JGS-B3B5E1

20210123-YY-B3B5E1 1414 (5.759)

1: TOF MS ES-  
4.92e+005

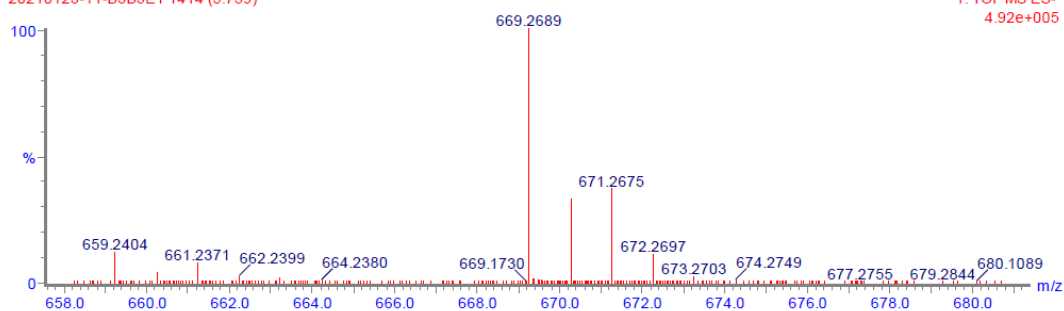

Figure S35. HRESIMS spectrum of chantriolide J (5)

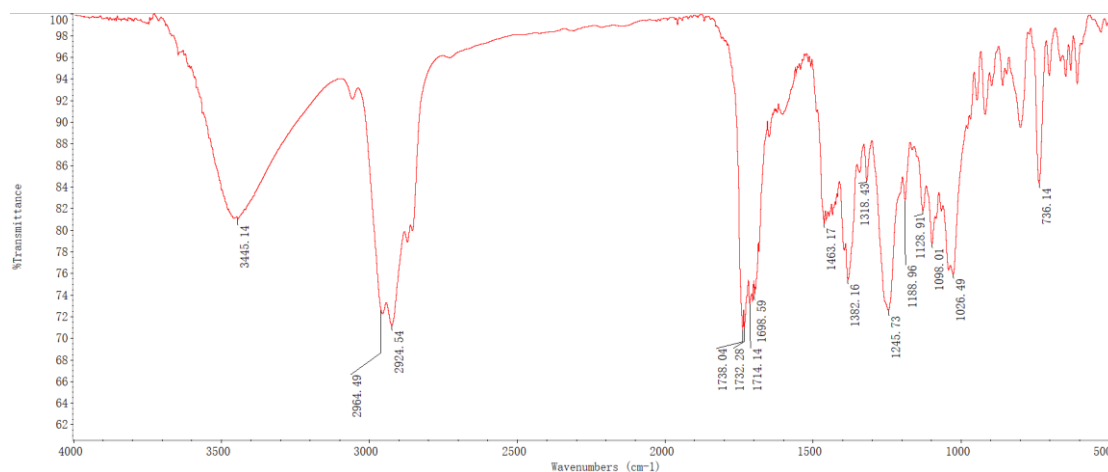

Figure S36. IR spectrum of chantriolide J (5)

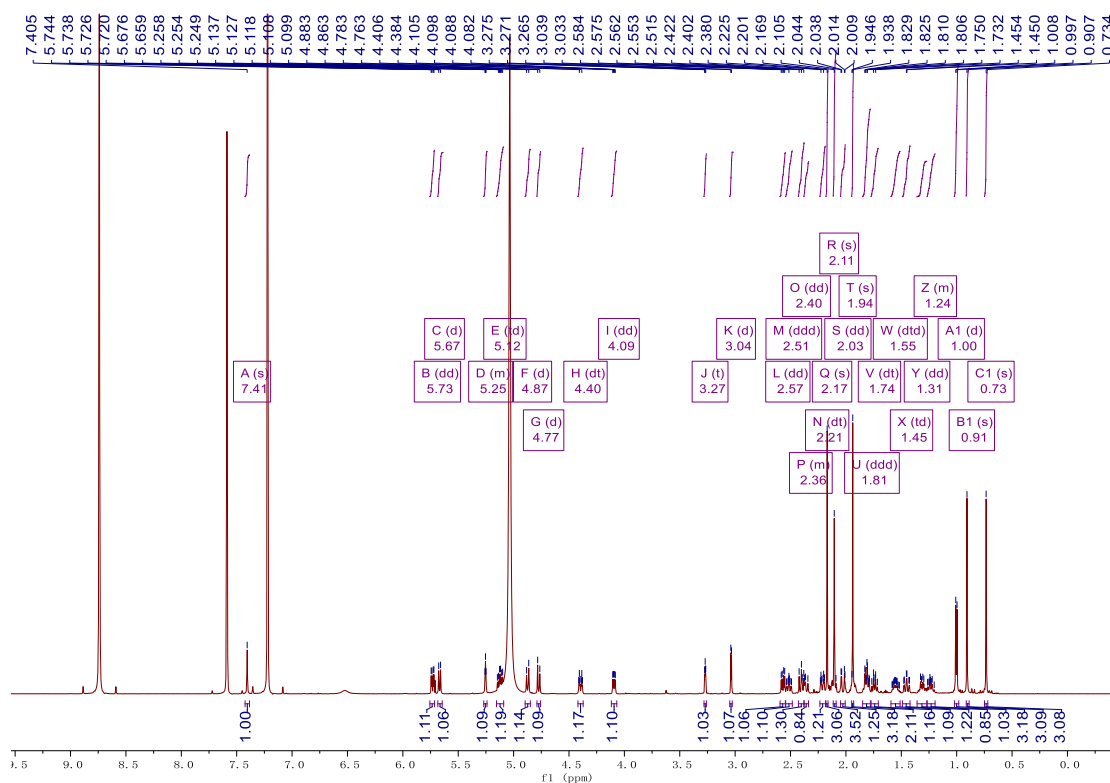

**Figure S37.** <sup>1</sup>H NMR (600 MHz) spectrum of chantriolide J (**5**) in C<sub>5</sub>D<sub>5</sub>N

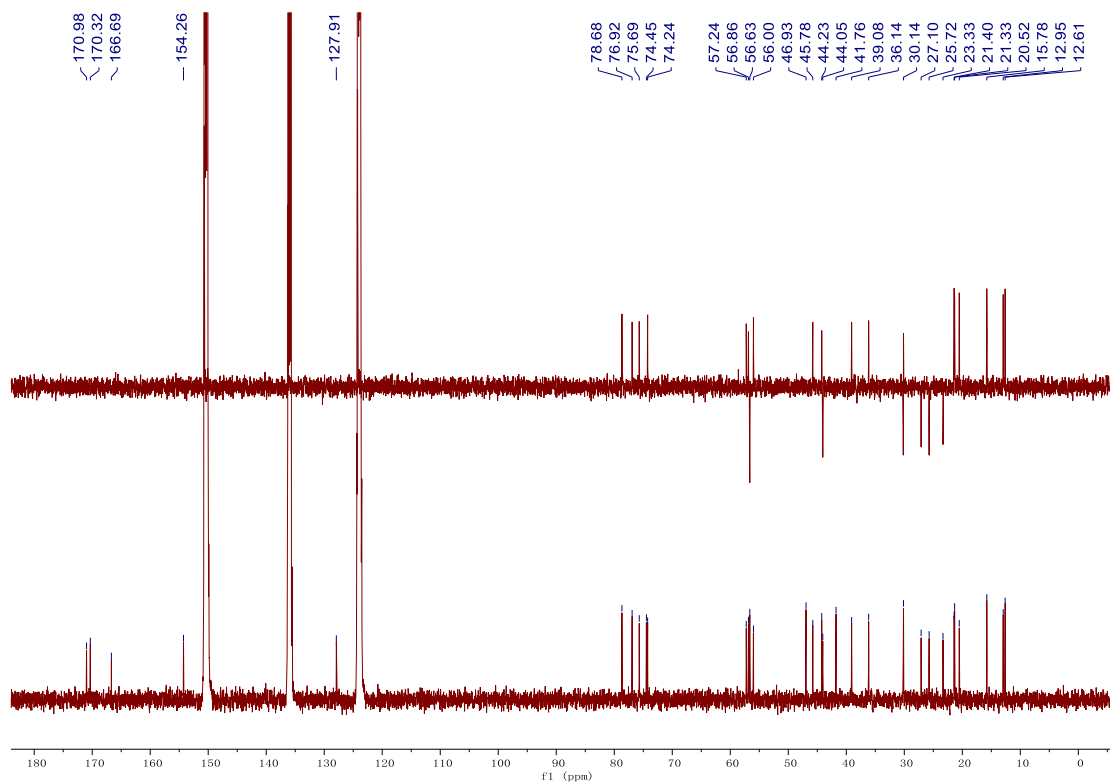

**Figure S38.** <sup>13</sup>C and DEPT-135 NMR (125 MHz) spectra of chantriolide J (**5**) in C<sub>5</sub>D<sub>5</sub>N

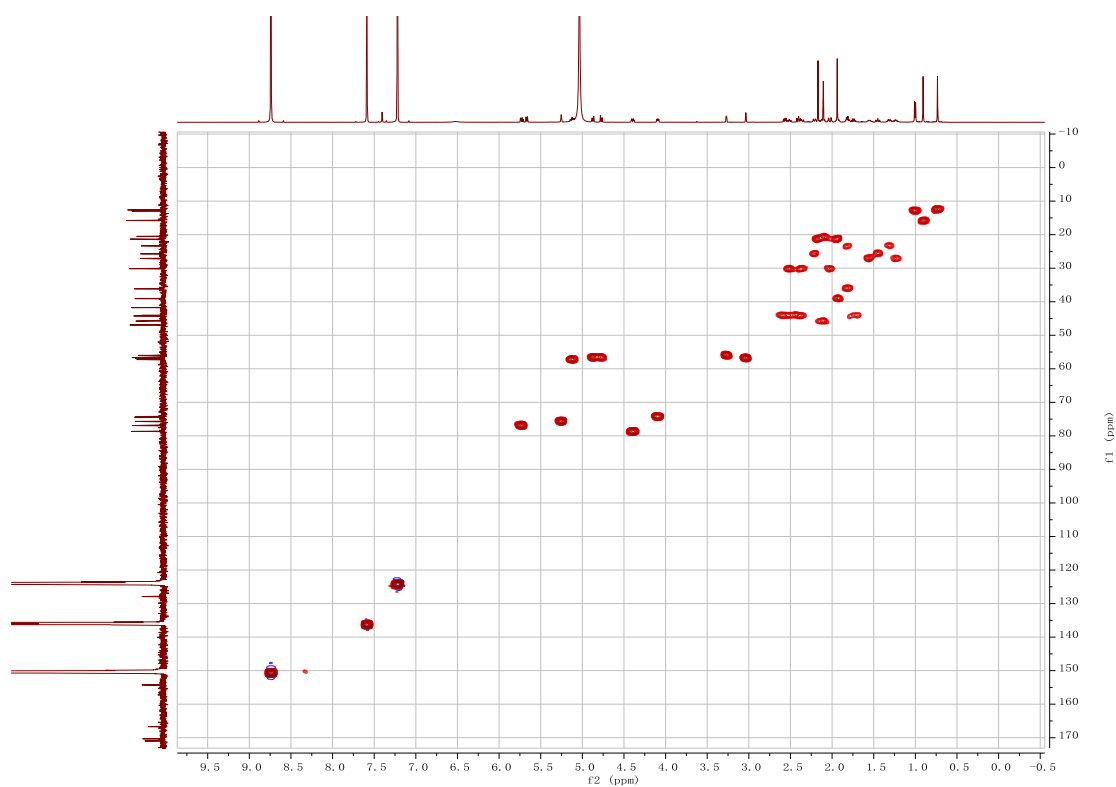

**Figure S39.** HSQC spectrum of chantriolide J (**5**) in  $C_5D_5N$

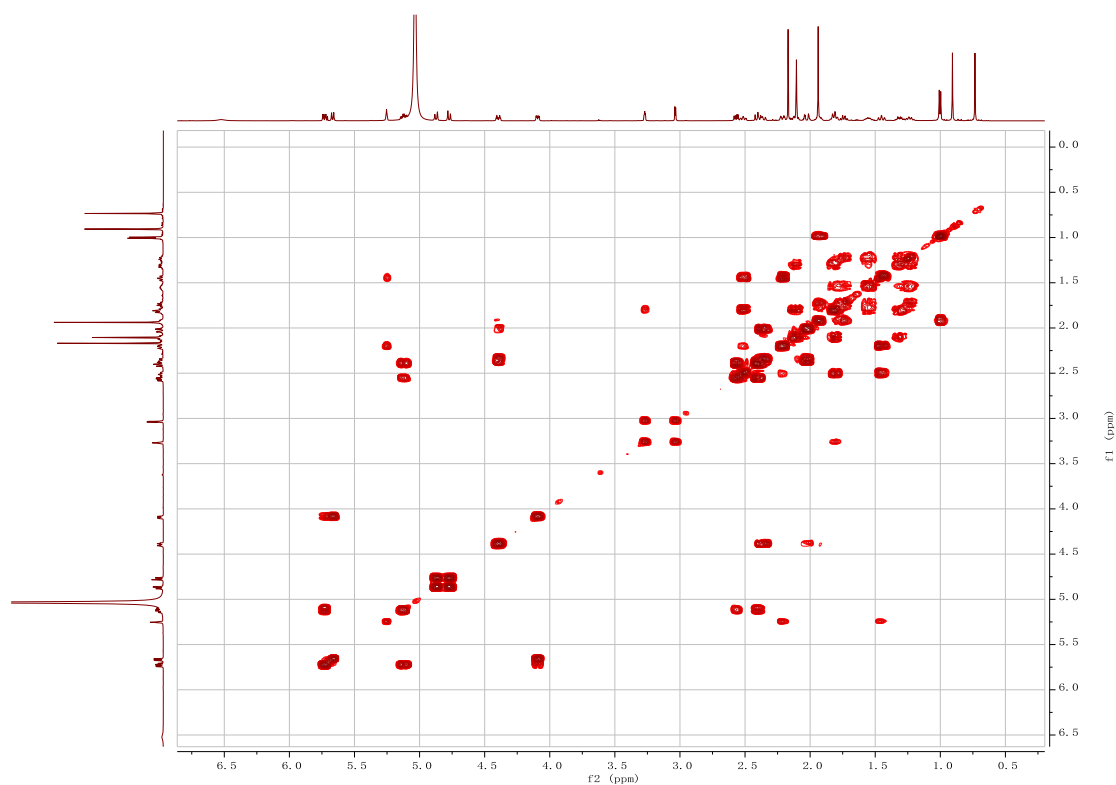

**Figure S40.**  $^1H$ - $^1H$  COSY spectrum of chantriolide J (**5**) in  $C_5D_5N$

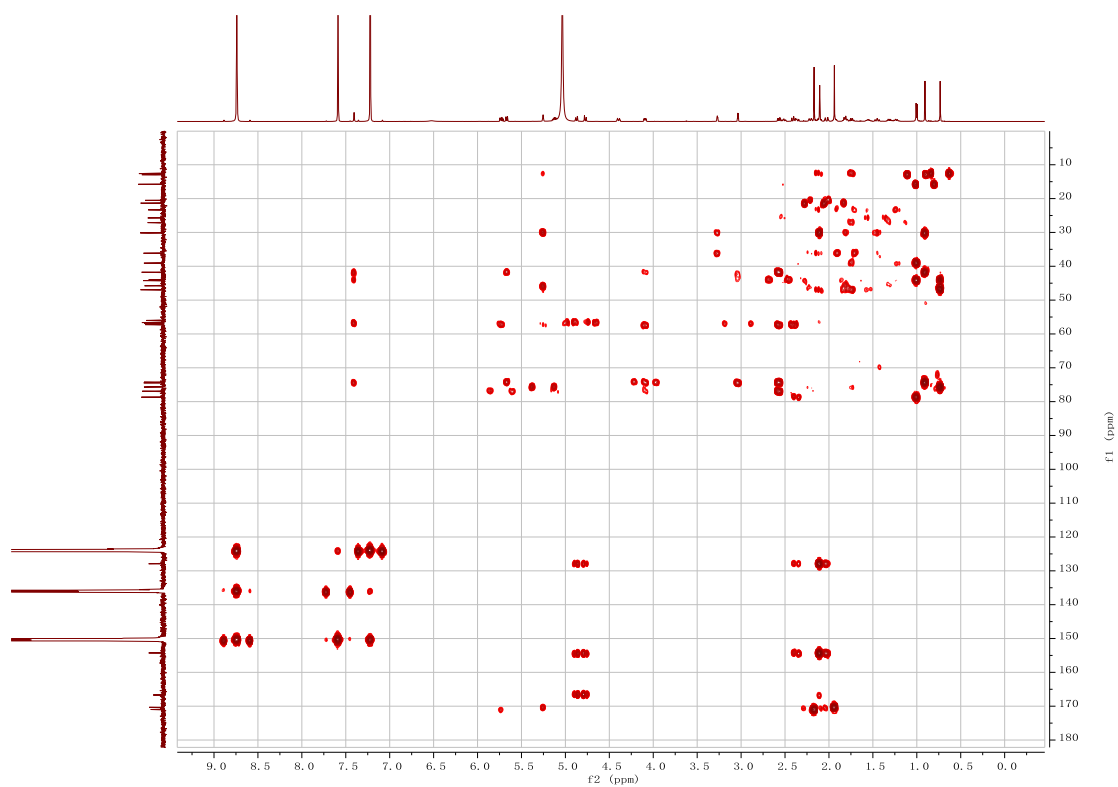

**Figure S41.** HMBC spectrum of chantriolide J (**5**) in  $C_5D_5N$

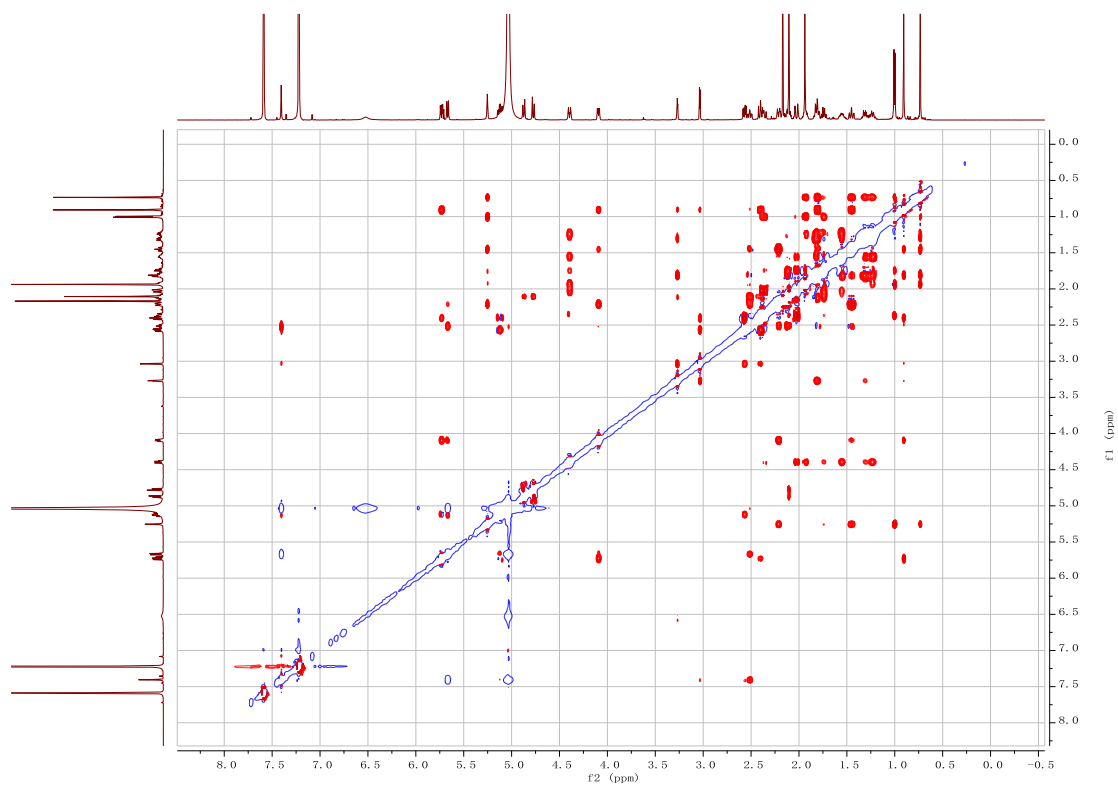

**Figure S42.** ROESY spectrum of chantriolide J (**5**) in  $C_5D_5N$

# Elemental Composition Report

## Single Mass Analysis

Tolerance = 5.0 PPM / DBE: min = -1.5, max = 50.0

Element prediction: Off

Number of isotope peaks used for i-FIT = 3

Monoisotopic Mass, Even Electron Ions

1102 formula(e) evaluated with 7 results within limits (up to 10 closest results for each mass)

Elements Used:

C: 20-50 H: 0-70 N: 0-1 O: 0-15 Na: 0-1 Cl: 0-2

Minimum: -1.5

Maximum: 5.0 5.0 50.0

| Mass     | Calc. Mass | mDa | PPM | DBE | i-FIT | Norm  | Conf(%) | Formula        |
|----------|------------|-----|-----|-----|-------|-------|---------|----------------|
| 641.2735 | 641.2729   | 0.6 | 0.9 | 9.5 | 506.2 | 0.471 | 62.42   | C32 H46 O11 Cl |

JGS-B2K1G1B5A

20180205-SA-TOF-026 690 (2.959)

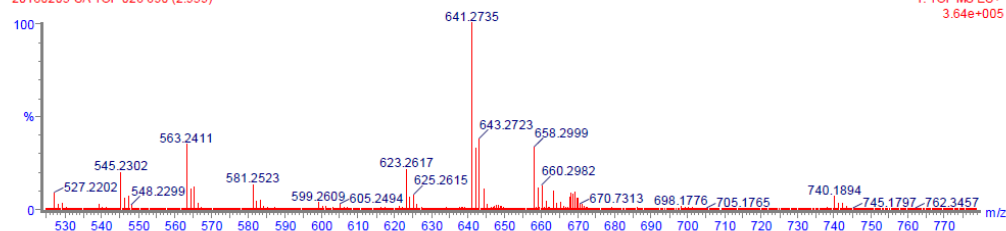

Figure S43. HRESIMS spectrum of chantriolide K (6)

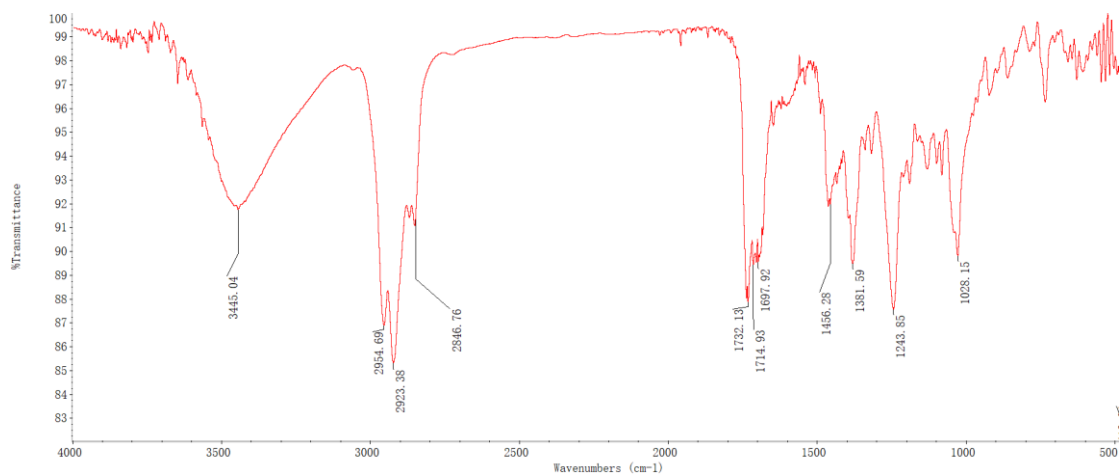

Figure S44. IR spectrum of chantriolide K (6)

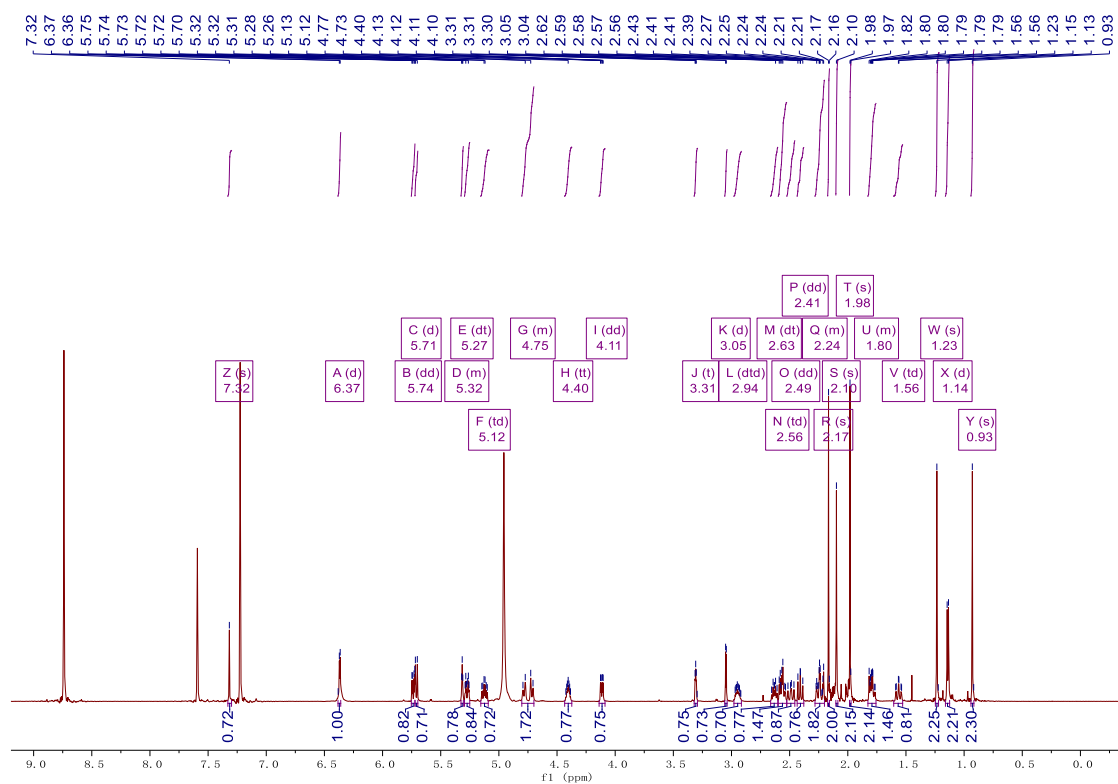

**Figure S45.**  $^1\text{H}$  NMR (600 MHz) spectrum of chantriolide K (6) in  $\text{C}_5\text{D}_5\text{N}$

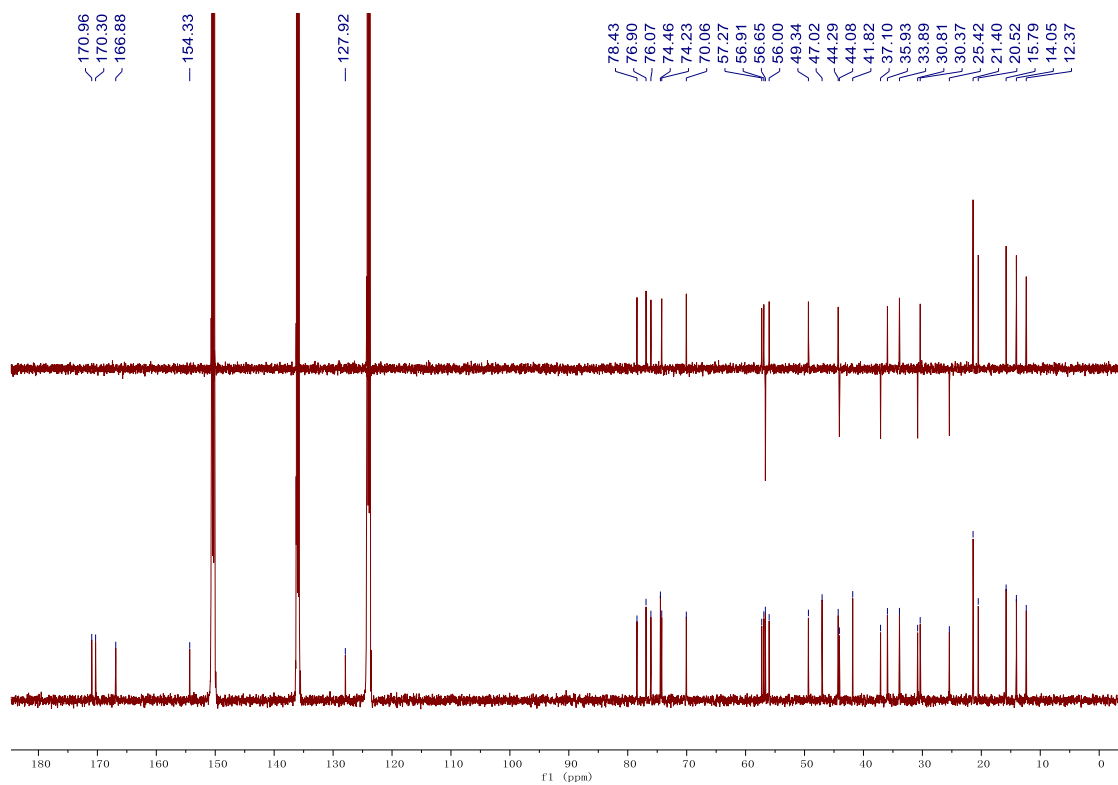

**Figure S46.**  $^{13}\text{C}$  and DEPT-135 NMR (125 MHz) spectra of chantriolide K (6) in  $\text{C}_5\text{D}_5\text{N}$

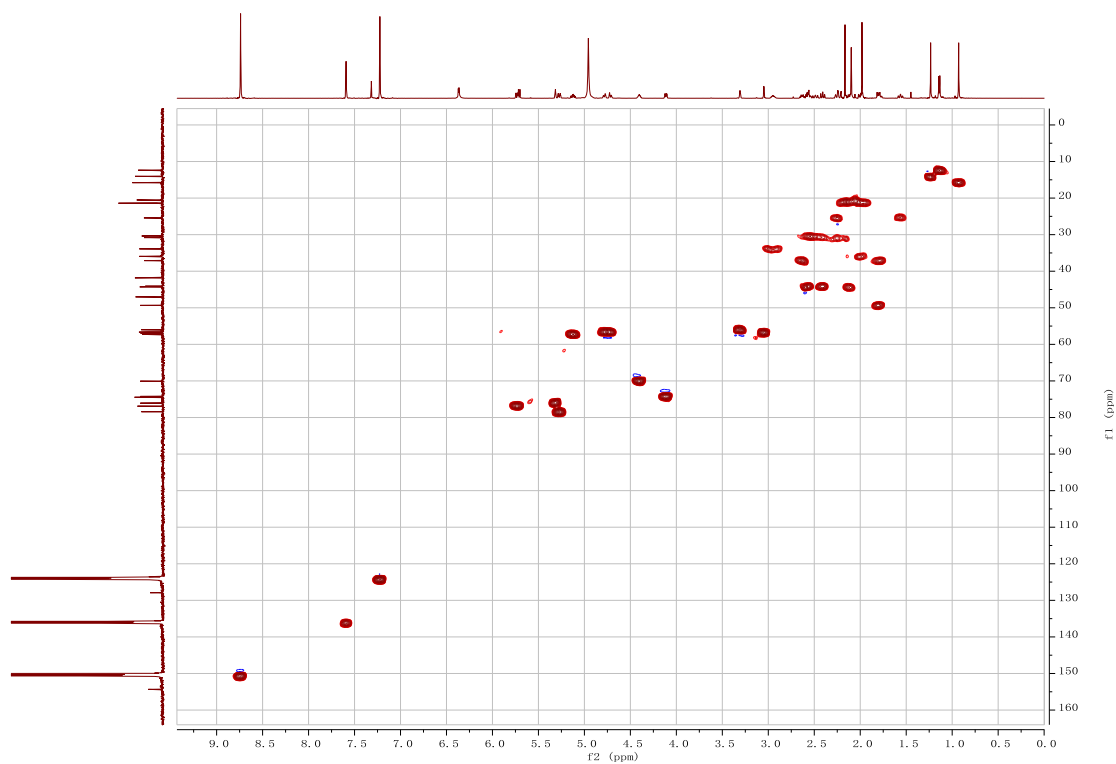

**Figure S47.** HSQC spectrum of chantriolide K (**6**) in  $C_5D_5N$

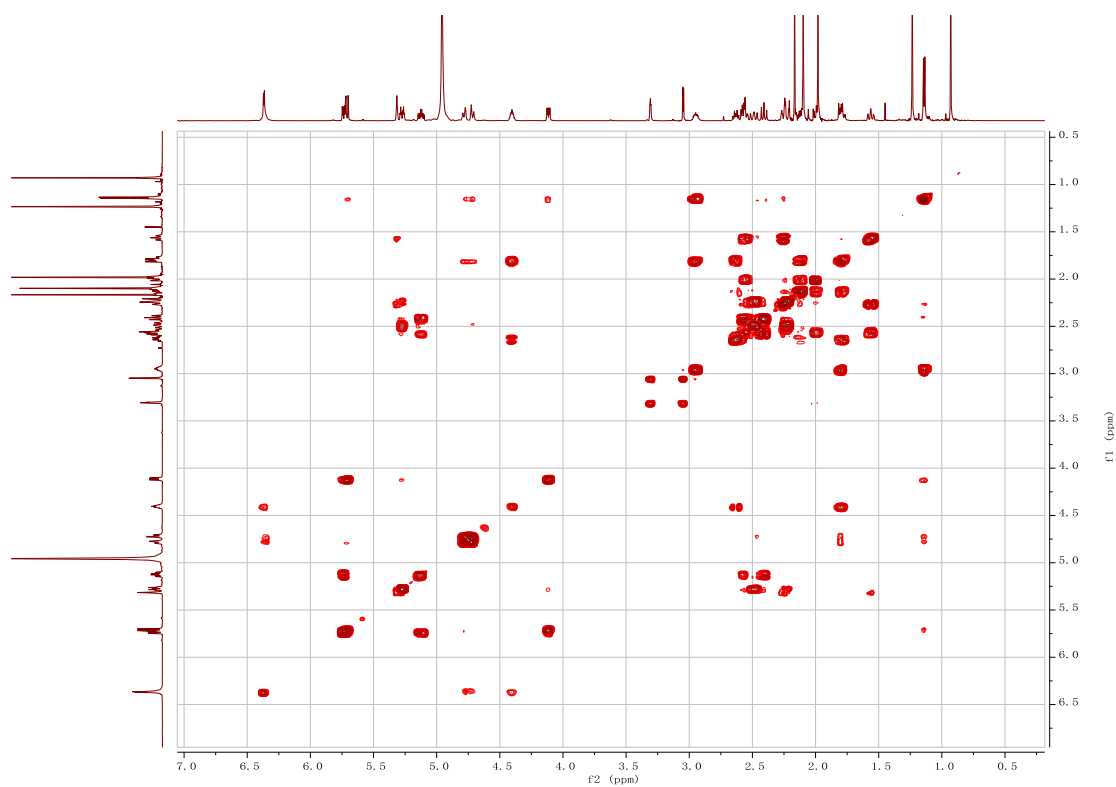

**Figure S48.**  $^1H$ - $^1H$  COSY spectrum of chantriolide K (**6**) in  $C_5D_5N$



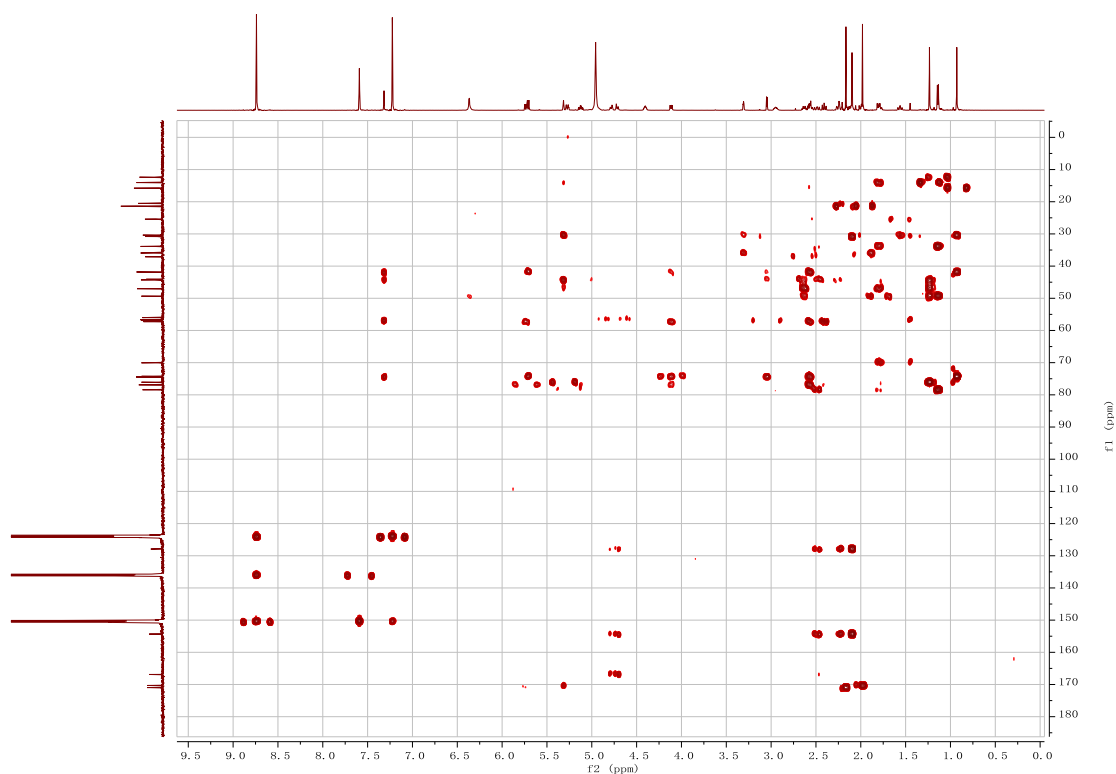

**Figure S49.** HMBC spectrum of chantriolide K (**6**) in  $C_5D_5N$

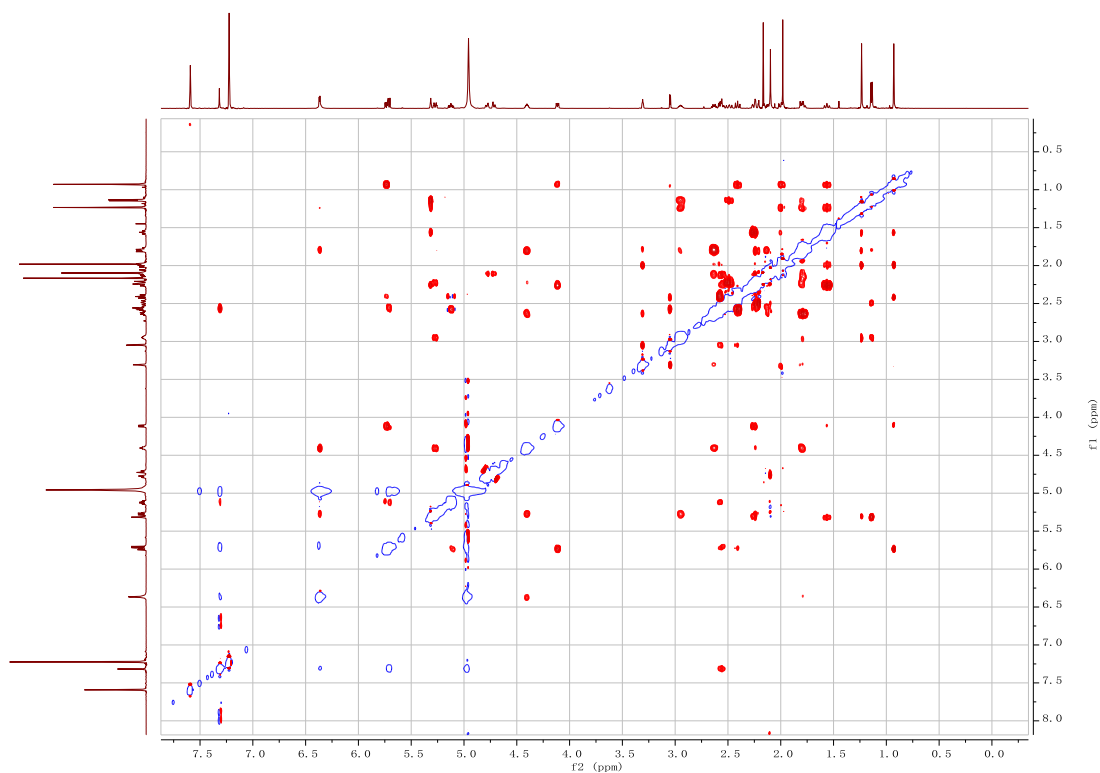

**Figure S50.** ROESY spectrum of chantriolide K (**6**) in  $C_5D_5N$

Data Filename 20171010\_ESIH\_YY\_YY\_172240.d  
Sample Type Sample  
Instrument Name Agilent G6520 Q-TOF  
Acquired Time 10/10/2017 10:34:22 AM  
DA Method small molecular data analysis method.m

Sample Name D3-JGS-B2K1ESC  
Position P2-A3  
Acq Method 20160322\_MS\_ESIH\_POS\_1min.m  
IRM Calibration Status Success  
Comment ESIH by ZZY

#### User Spectra

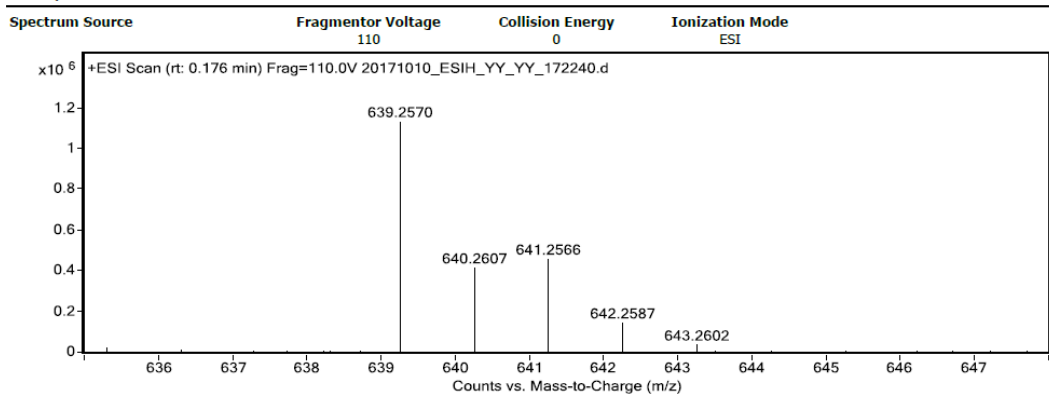

#### Formula Calculator Results

| m/z     | Calc m/z | Diff (mDa) | Diff (ppm) | Ion Formula    | Ion    |
|---------|----------|------------|------------|----------------|--------|
| 639.257 | 639.2567 | -0.29      | -0.45      | C32 H44 Cl O11 | (M+H)+ |

**Figure S51.** HRESIMS spectrum of chantriolide L (7)

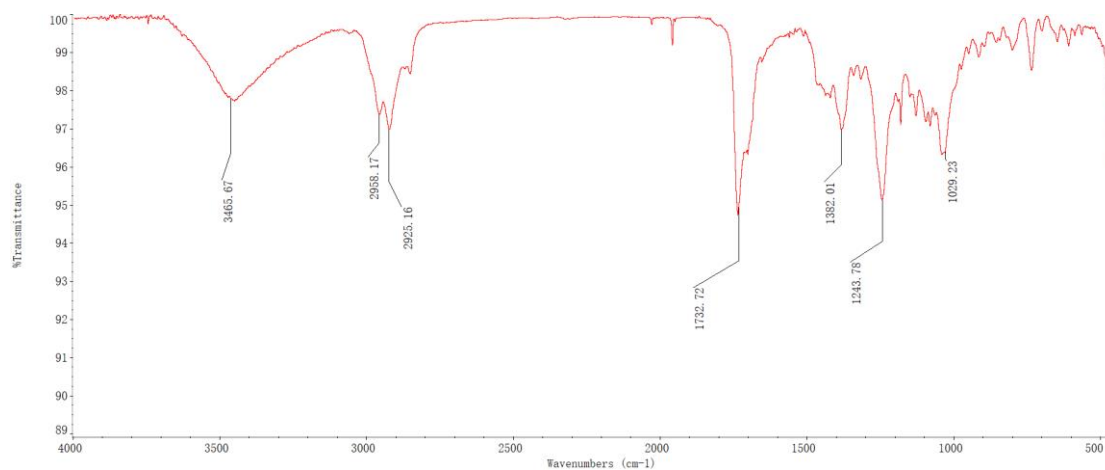

**Figure S52.** IR spectrum of chantriolide L (7)

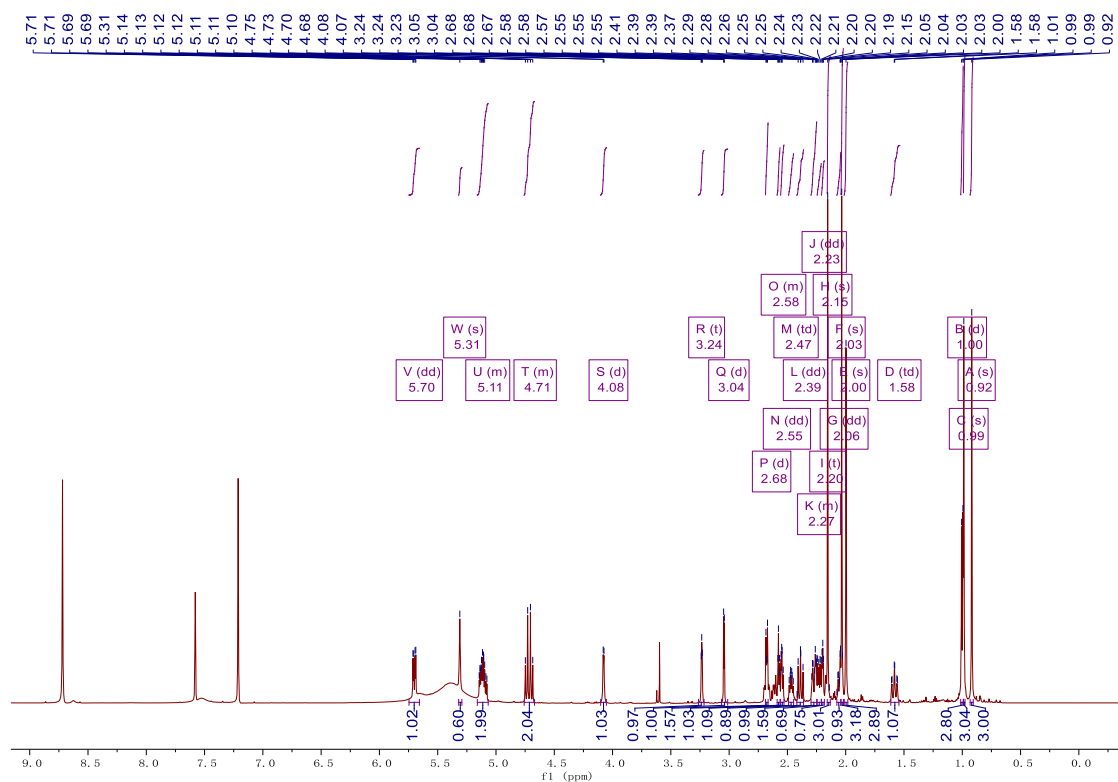

**Figure S53.**  $^1\text{H}$  NMR (600 MHz) spectrum of chantriolide L (**7**) in  $\text{C}_5\text{D}_5\text{N}$

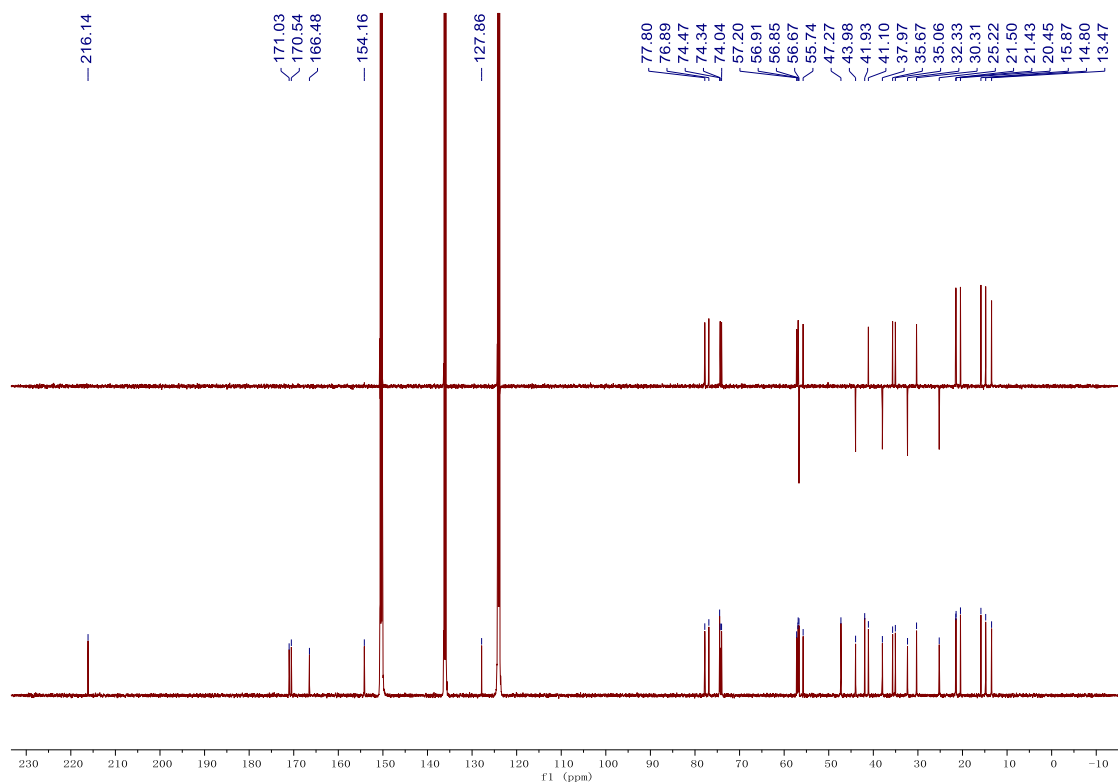

**Figure S54.**  $^{13}\text{C}$  and DEPT-135 NMR (125 MHz) spectra of chantriolide L (**7**) in  $\text{C}_5\text{D}_5\text{N}$

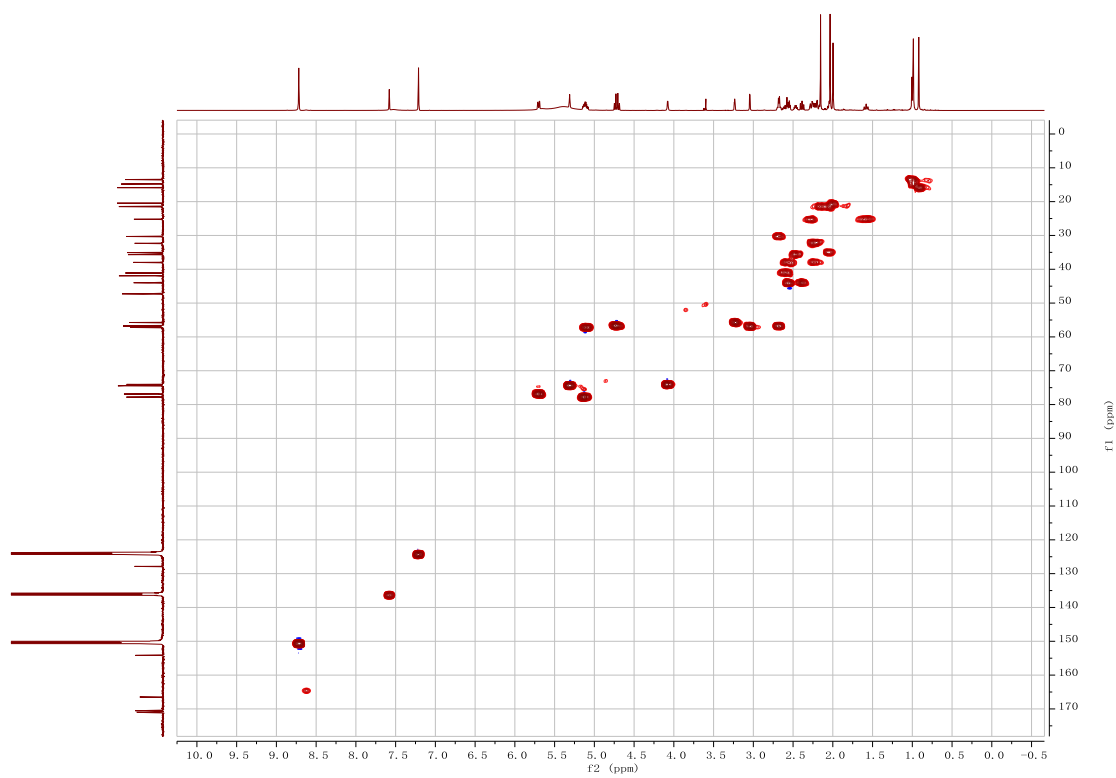

**Figure S55.** HSQC spectrum of chantriolide L (7) in C<sub>5</sub>D<sub>5</sub>N

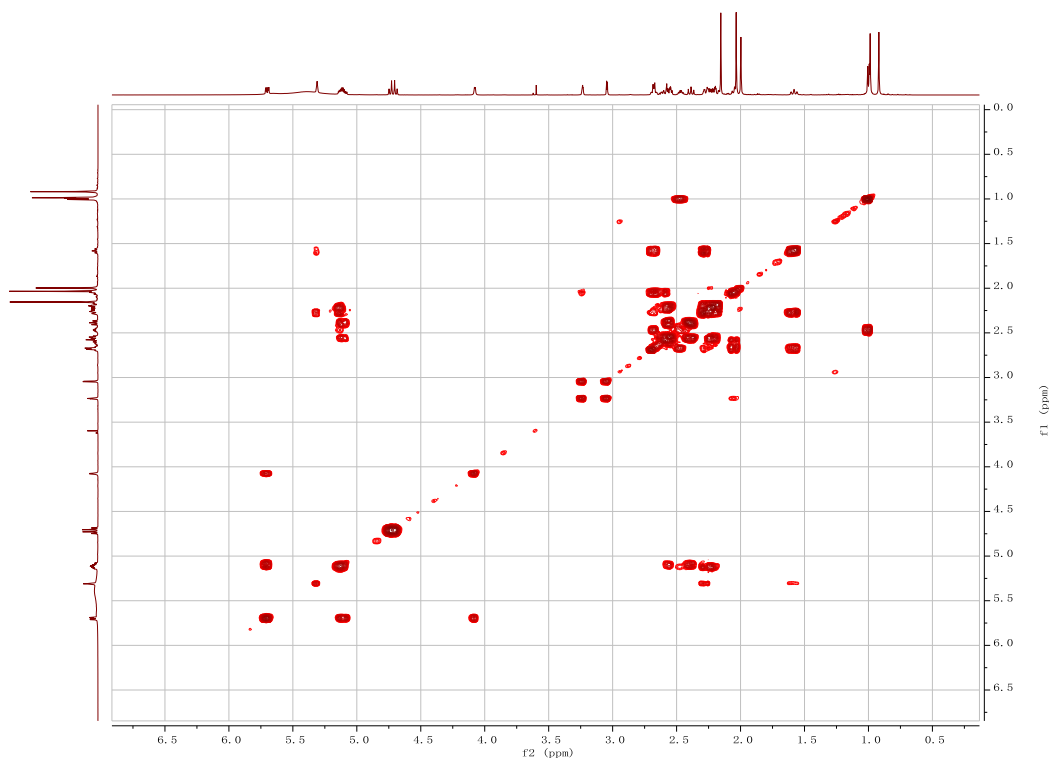

**Figure S56.** <sup>1</sup>H-<sup>1</sup>H COSY spectrum of chantriolide L (7) in C<sub>5</sub>D<sub>5</sub>N

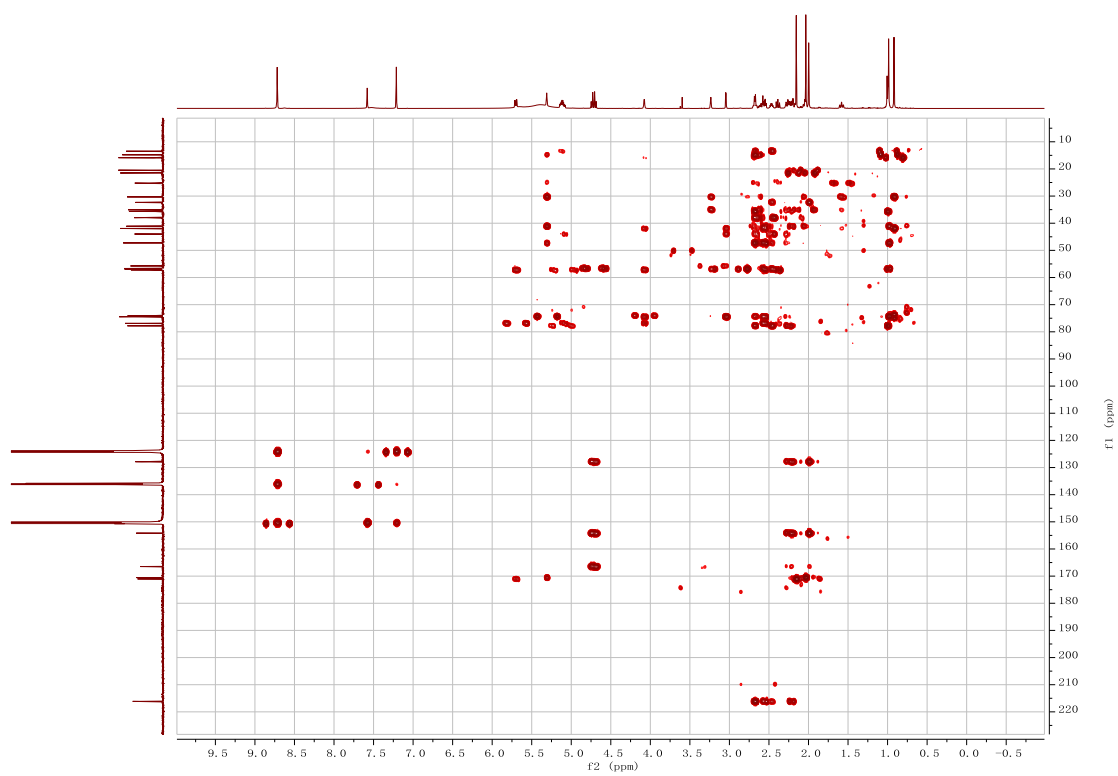

**Figure S57.** HMBC spectrum of chantriolide L (**7**) in C<sub>5</sub>D<sub>5</sub>N

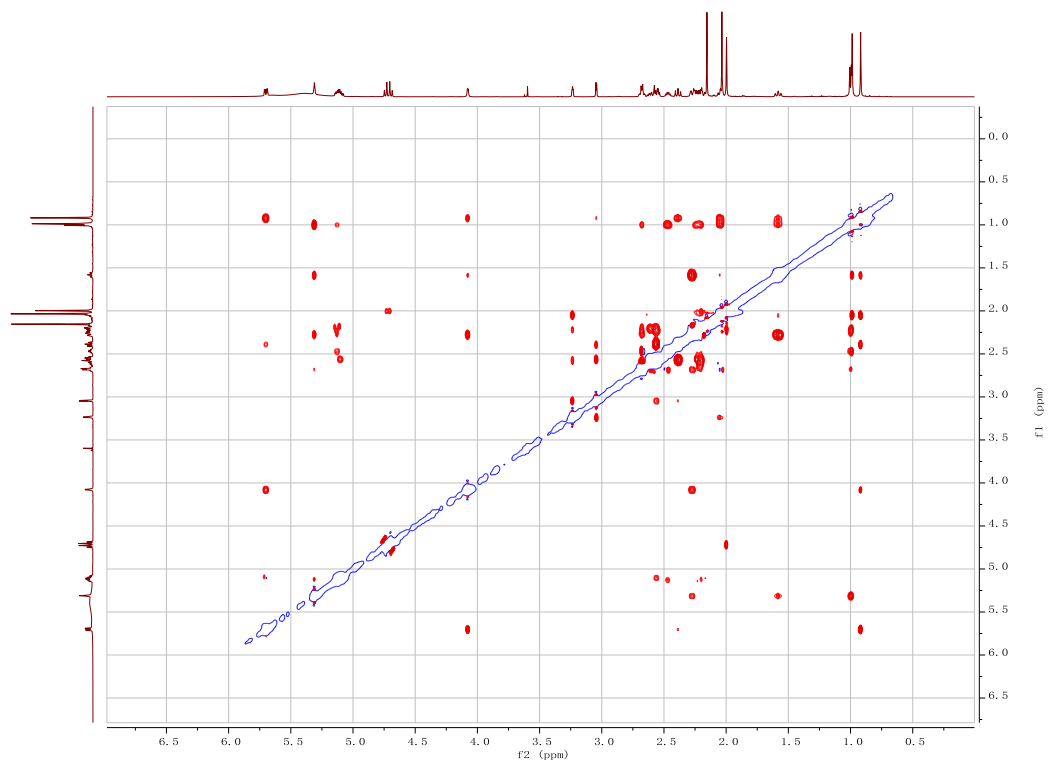

**Figure S58.** ROESY spectrum of chantriolide L (**7**) in C<sub>5</sub>D<sub>5</sub>N

|                        |                                        |                               |                             |
|------------------------|----------------------------------------|-------------------------------|-----------------------------|
| <b>Data Filename</b>   | 20171010_ESIH_YY_YY_172239.d           | <b>Sample Name</b>            | D3-JGS-B2K1E5A              |
| <b>Sample Type</b>     | Sample                                 | <b>Position</b>               | P2-A2                       |
| <b>Instrument Name</b> | Agilent G6520 Q-TOF                    | <b>Acq Method</b>             | 20160322_MS_ESIH_POS_1min.m |
| <b>Acquired Time</b>   | 10/10/2017 10:32:29 AM                 | <b>IRM Calibration Status</b> | Success                     |
| <b>DA Method</b>       | small molecular data analysis method.m | <b>Comment</b>                | ESI/ by ZZY                 |

#### User Spectra

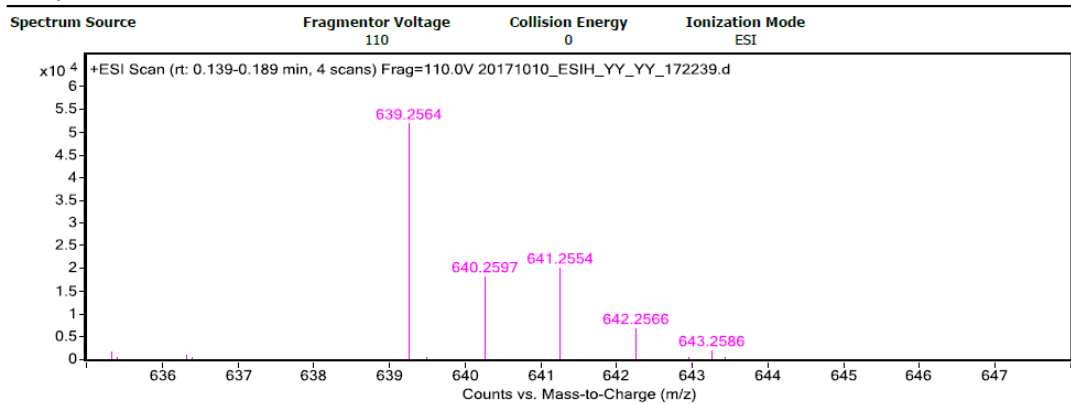

#### Formula Calculator Results

| m/z      | Calc m/z | Diff (mDa) | Diff (ppm) | Ion Formula    | Ion    |
|----------|----------|------------|------------|----------------|--------|
| 639.2564 | 639.2567 | 0.22       | 0.35       | C32 H44 Cl O11 | (M+H)+ |

**Figure S59.** HRESIMS spectrum of chantriolide M (**8**)

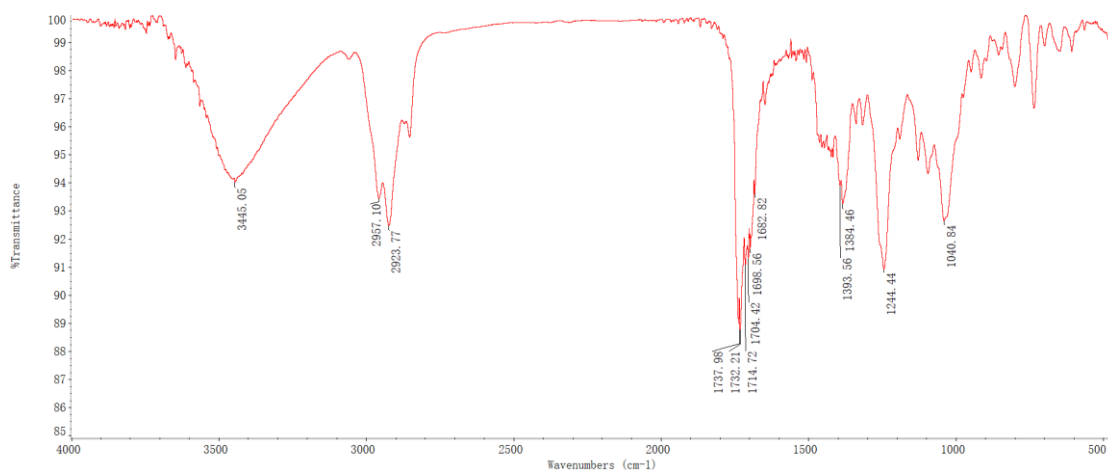

**Figure S60.** IR spectrum of chantriolide M (**8**)

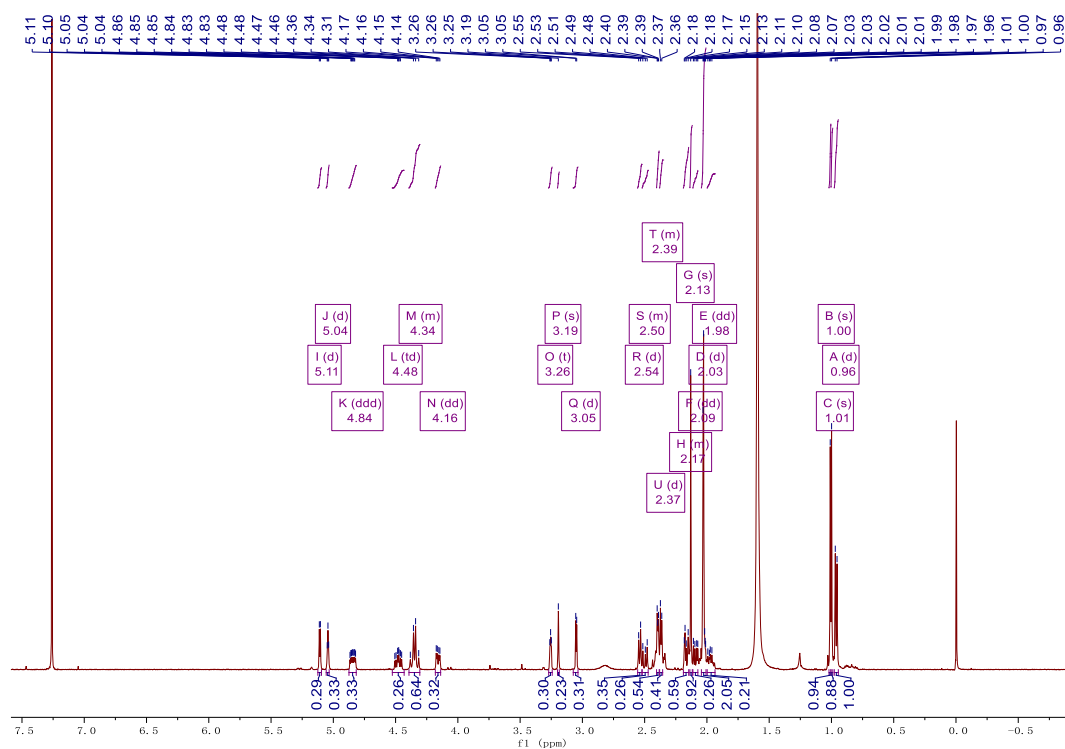

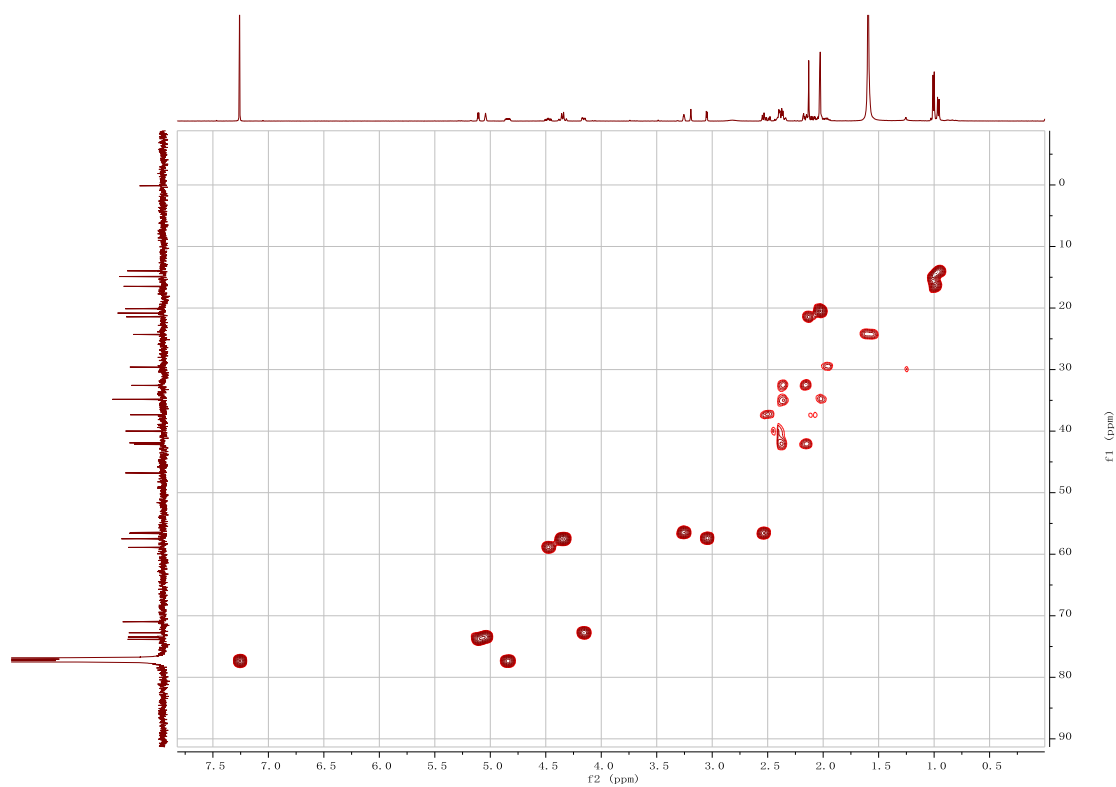

**Figure S63.** HSQC spectrum of chantriolide M (8) in CDCl<sub>3</sub>

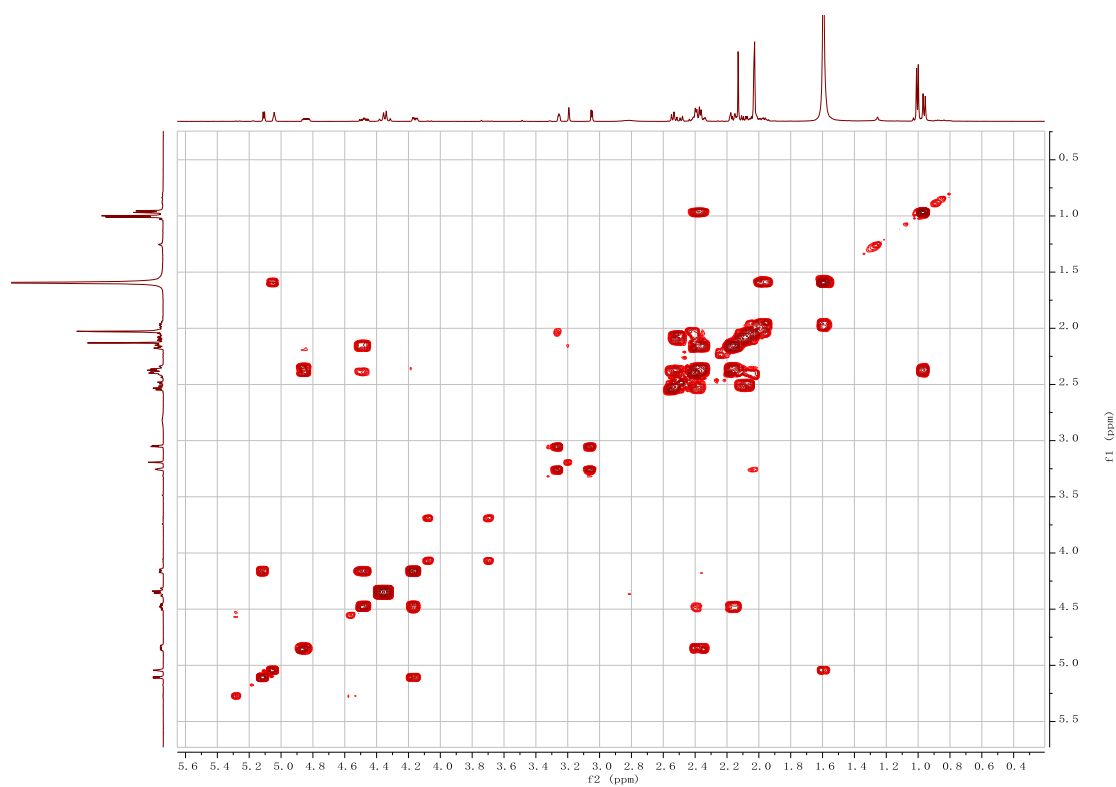

**Figure S64.** <sup>1</sup>H-<sup>1</sup>H COSY spectrum of chantriolide M (8) in CDCl<sub>3</sub>



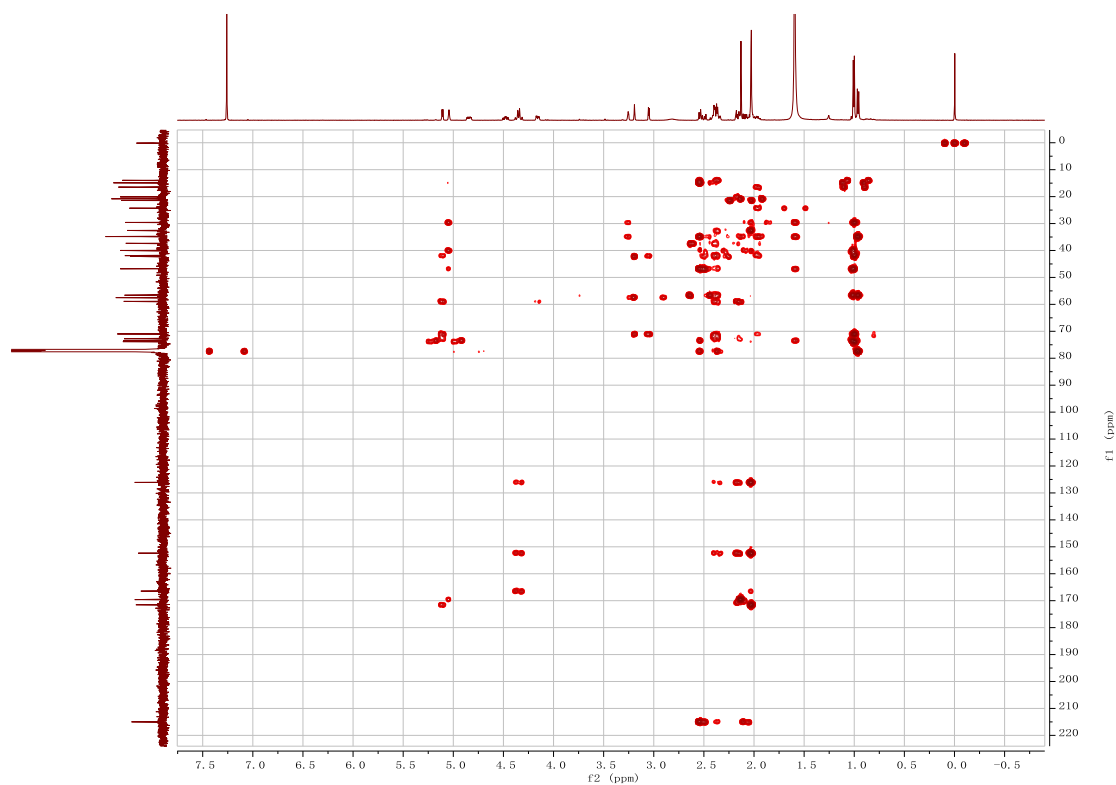

**Figure S65.** HMBC spectrum of chantriolide M (**8**) in  $\text{CDCl}_3$

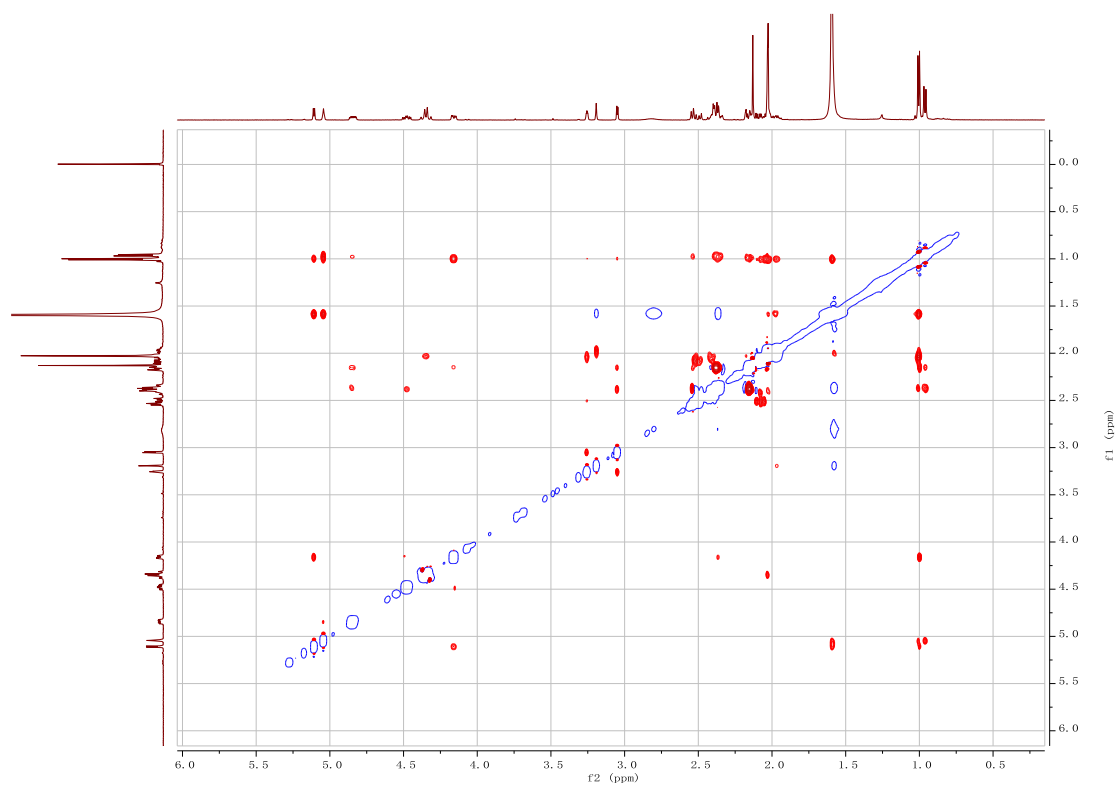

**Figure S66.** ROESY spectrum of chantriolide M (**8**) in  $\text{CDCl}_3$

# Elemental Composition Report

Tolerance = 5.0 PPM / DBE: min = -1.5, max = 50.0

Element prediction: Off

Number of isotope peaks used for i-FIT = 3

Monoisotopic Mass, Even Electron Ions

102 formula(e) evaluated with 1 results within limits (up to 50 best isotopic matches for each mass)

Elements Used:

C: 0-34 H: 0-200 O: 0-30 Na: 1-1

|          |        |            |      |      |     |       |      |         |               |  |      |
|----------|--------|------------|------|------|-----|-------|------|---------|---------------|--|------|
| Minimum: | 80.00  |            |      |      |     |       |      |         |               |  | -1.5 |
| Maximum: | 100.00 |            | 5.0  | 5.0  |     |       |      |         |               |  | 50.0 |
| Mass     | RA     | Calc. Mass | mDa  | PPM  | DBE | i-FIT | Norm | Conf(%) | Formula       |  |      |
| 499.3026 | 100.00 | 499.3036   | -1.0 | -2.0 | 6.5 | 379.1 | n/a  | n/a     | C28 H44 O6 Na |  |      |

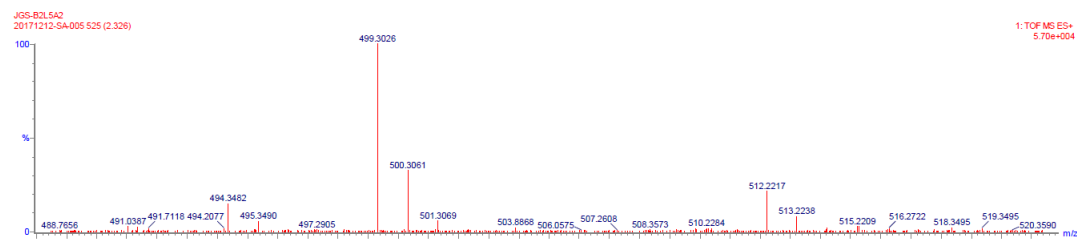

**Figure S67.** HRESIMS spectrum of chantriolide N (9)

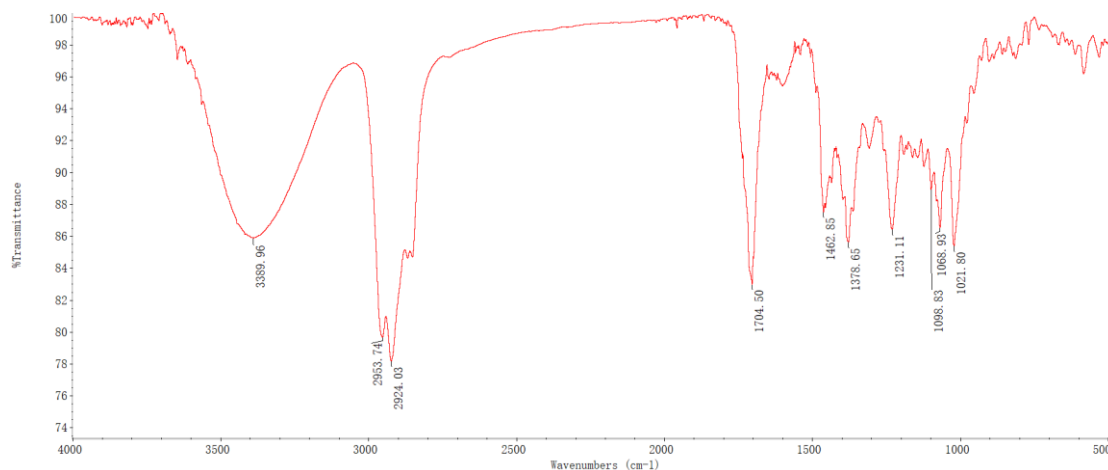

**Figure S68.** IR spectrum of chantriolide N (9)

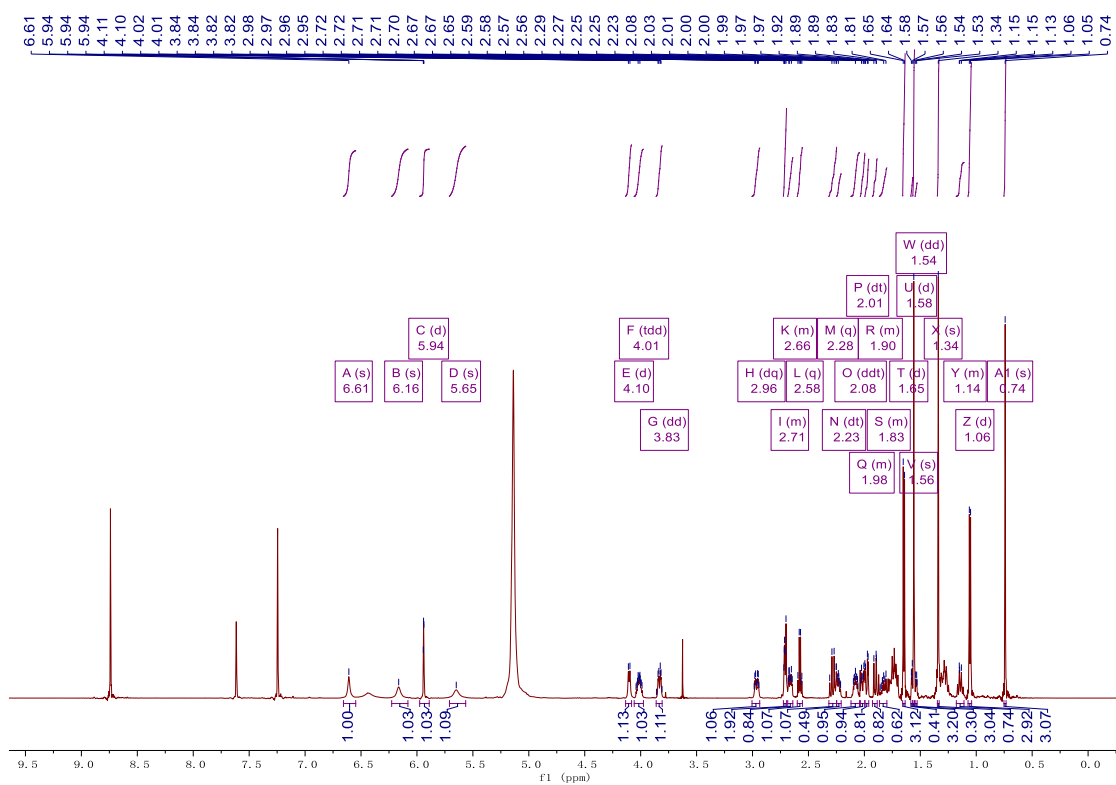

**Figure S69.** <sup>1</sup>H NMR (600 MHz) spectrum of chantriolide N (9) in C<sub>5</sub>D<sub>5</sub>N

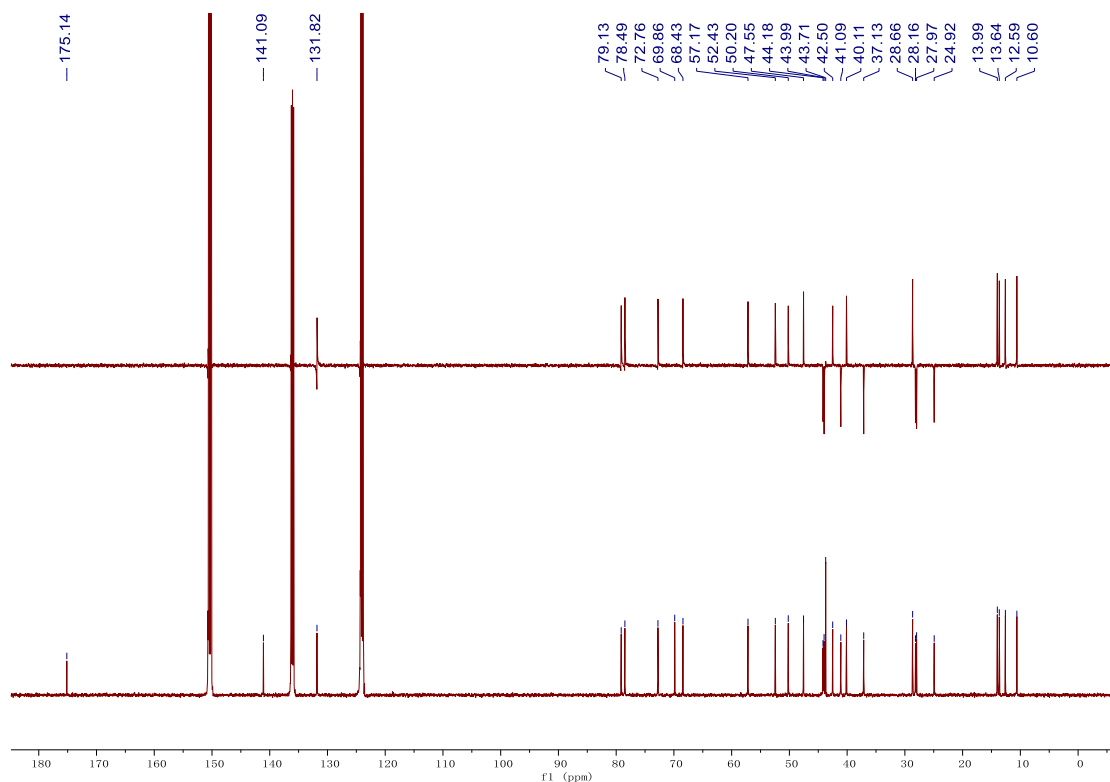

**Figure S70.** <sup>13</sup>C and DEPT-135 NMR (125 MHz) spectra of chantriolide N (9) in C<sub>5</sub>D<sub>5</sub>N

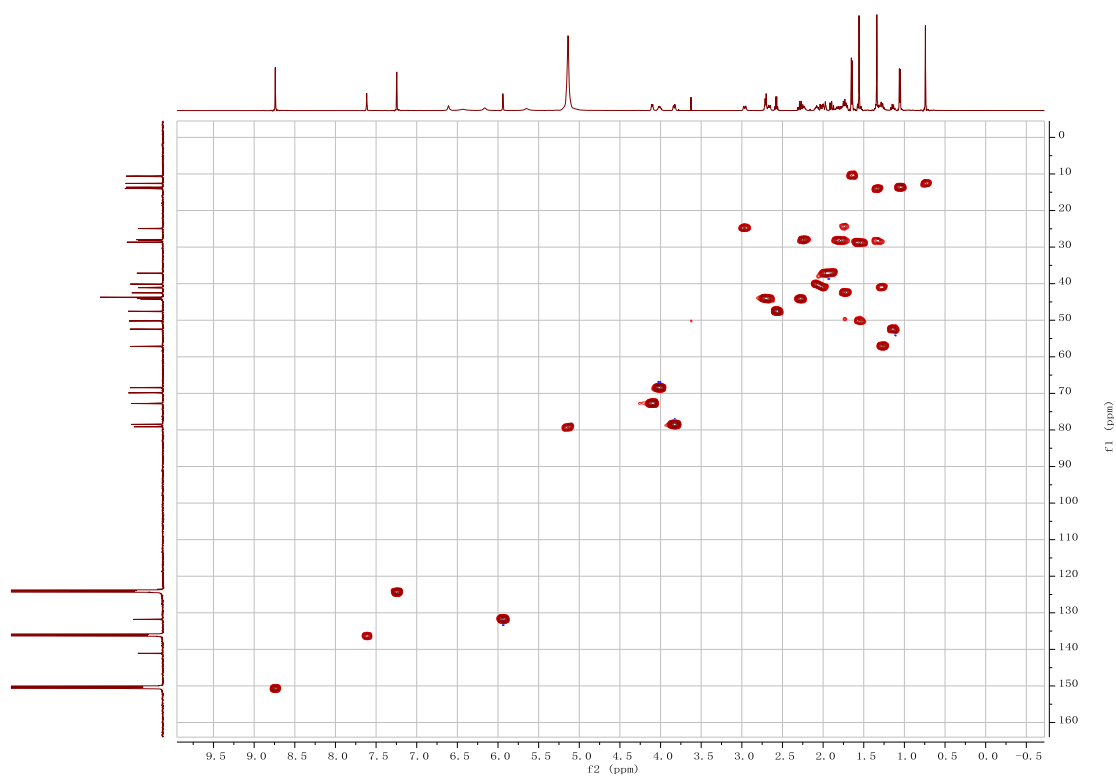

**Figure S71.** HSQC spectrum of chantriolide N (**9**) in  $C_5D_5N$

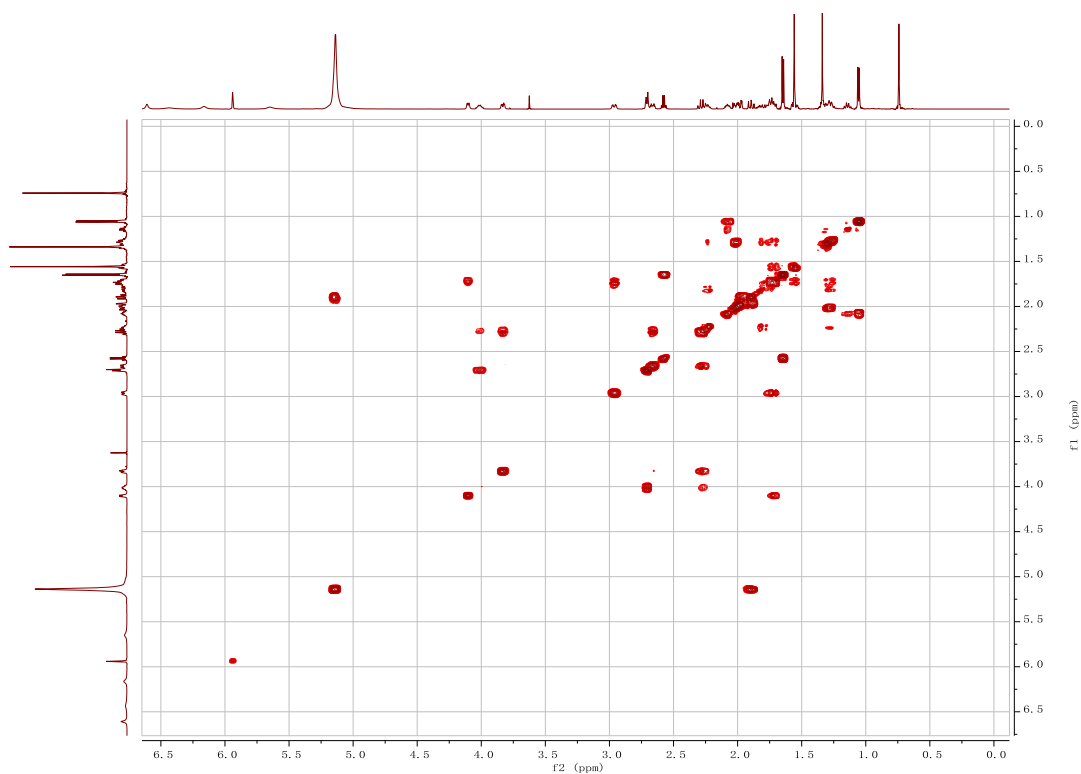

**Figure S72.**  $^1H$ - $^1H$  COSY spectrum of chantriolide N (**9**) in  $C_5D_5N$

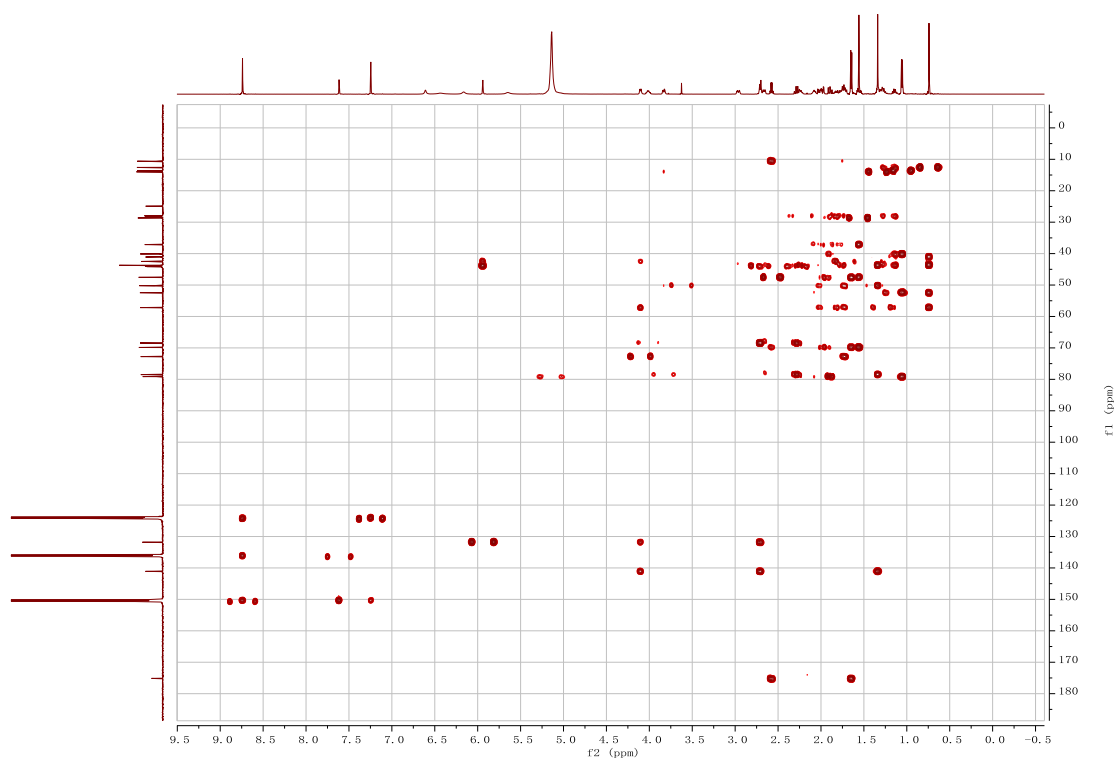

**Figure S73.** HMBC spectrum of chantriolide N (**9**) in C<sub>5</sub>D<sub>5</sub>N

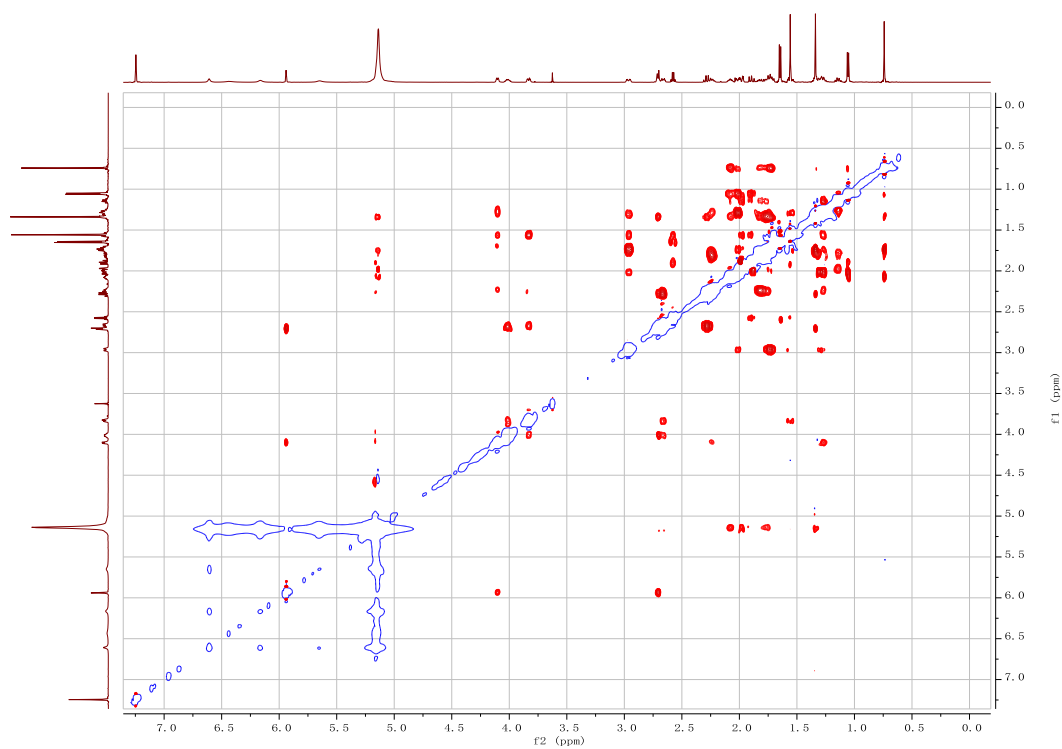

**Figure S74.** ROESY spectrum of chantriolide N (**9**) in C<sub>5</sub>D<sub>5</sub>N

# Elemental Composition Report

## Single Mass Analysis

Tolerance = 10.0 PPM / DBE: min = -1.5, max = 50.0

Element prediction: Off

Number of isotope peaks used for i-FIT = 3

Monoisotopic Mass, Even Electron Ions

22 formula(e) evaluated with 1 results within limits (up to 5 best isotopic matches for each mass)

Elements Used:

C: 20-30 H: 20-46 O: 0-15

Minimum: -1.5

Maximum: 5.0 10.0 50.0

| Mass     | Calc. Mass | mDa | PPM | DBE | i-FIT | Norm | Conf(%) | Formula                                        |
|----------|------------|-----|-----|-----|-------|------|---------|------------------------------------------------|
| 493.3180 | 493.3165   | 1.5 | 3.0 | 6.5 | 354.6 | n/a  | n/a     | C <sub>28</sub> H <sub>45</sub> O <sub>7</sub> |

JGS-B2K1G1B1

20171221-SA-009 637 (2.757)

1: TOF MS ES+  
8.44e+004

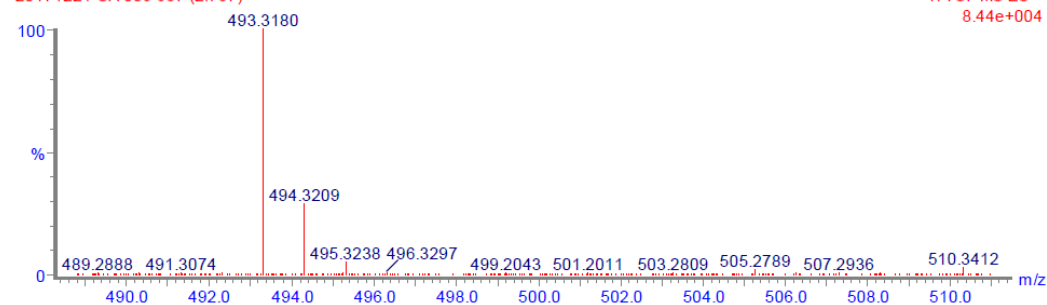

Figure S75. HRESIMS spectrum of chantriolide O (10)

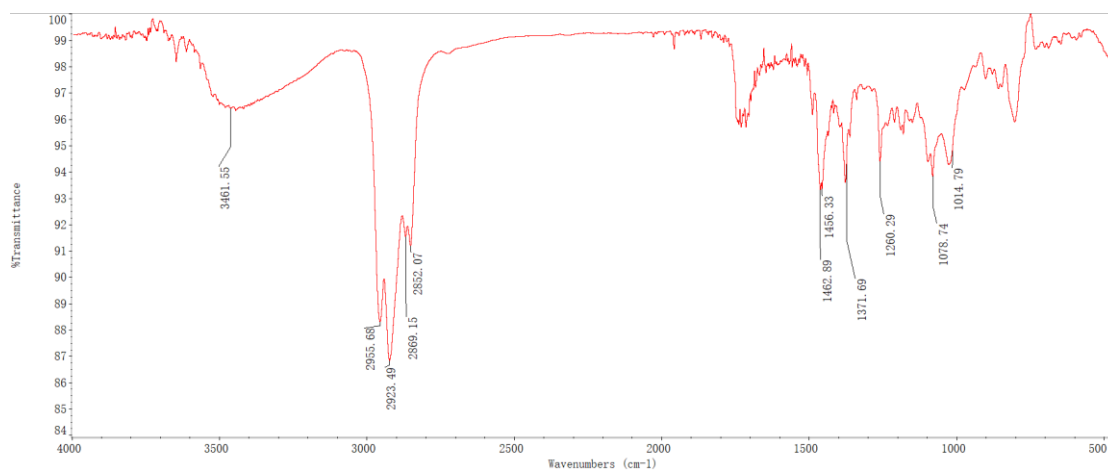

Figure S76. IR spectrum of chantriolide O (10)

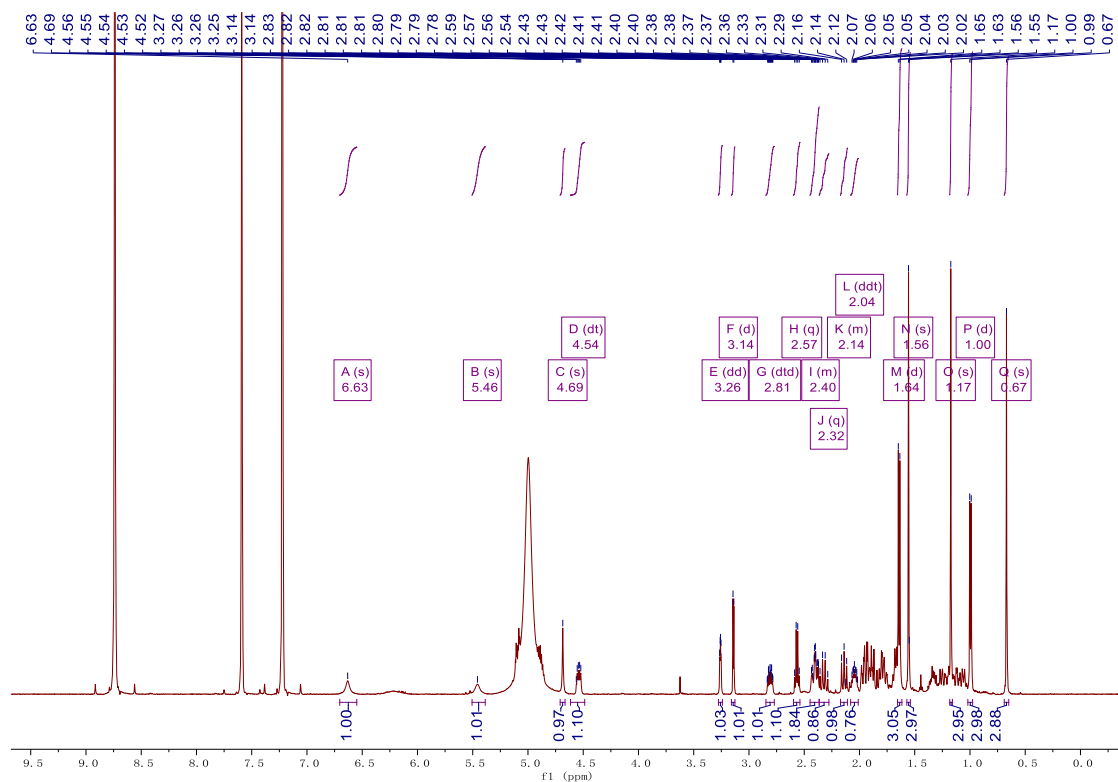

**Figure S77.** <sup>1</sup>H NMR (500 MHz) spectrum of chantriolide O (**10**) in C<sub>5</sub>D<sub>5</sub>N

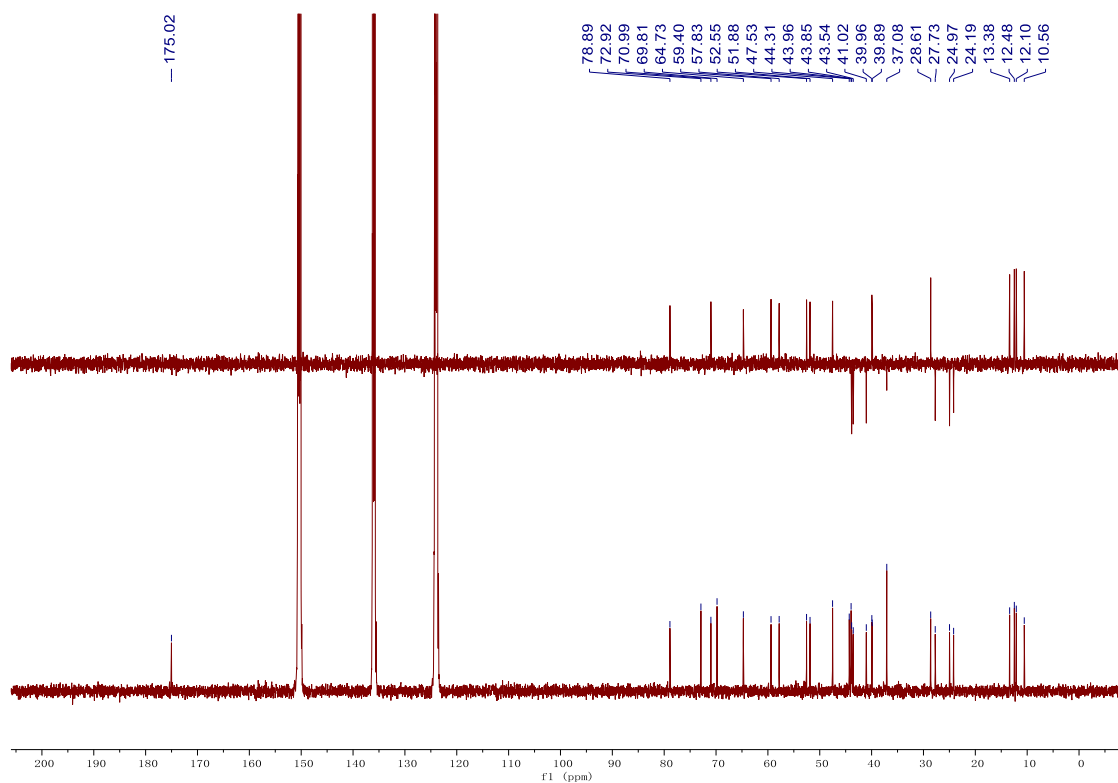

**Figure S78.** <sup>13</sup>C and DEPT-135 NMR (125 MHz) spectra of chantriolide O (**10**) in C<sub>5</sub>D<sub>5</sub>N

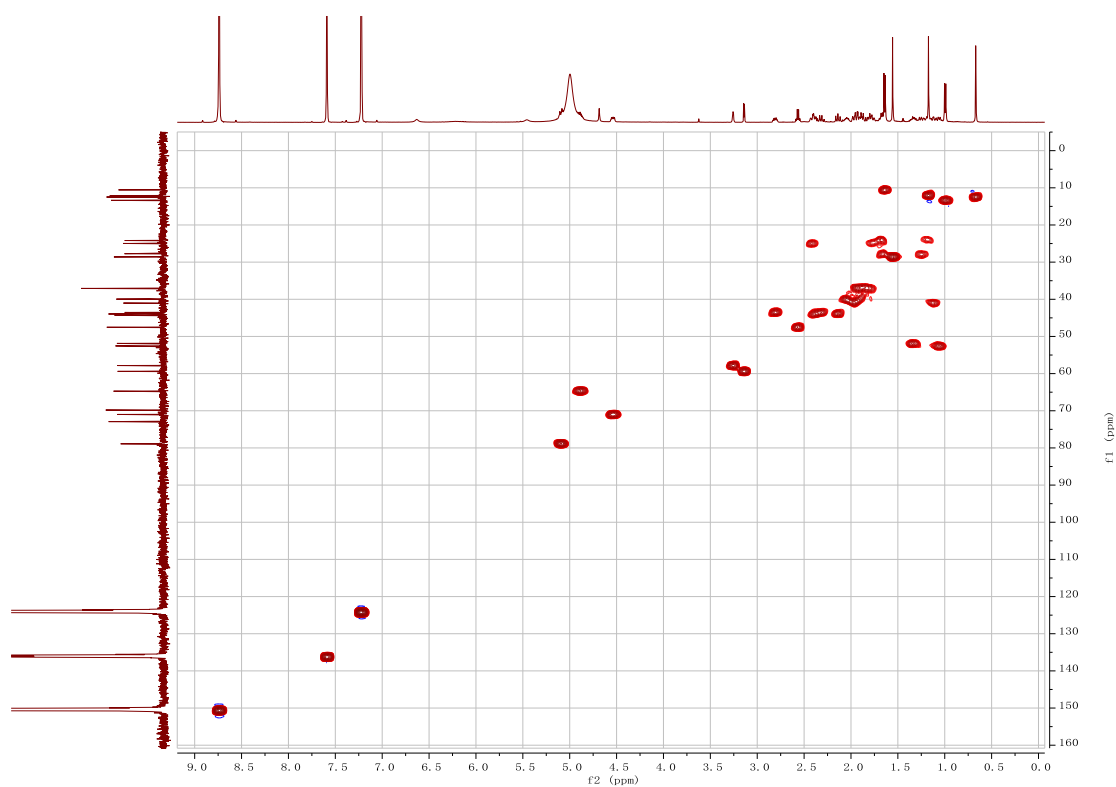

**Figure S79.** HSQC spectrum of chantriolide O (**10**) in C<sub>5</sub>D<sub>5</sub>N

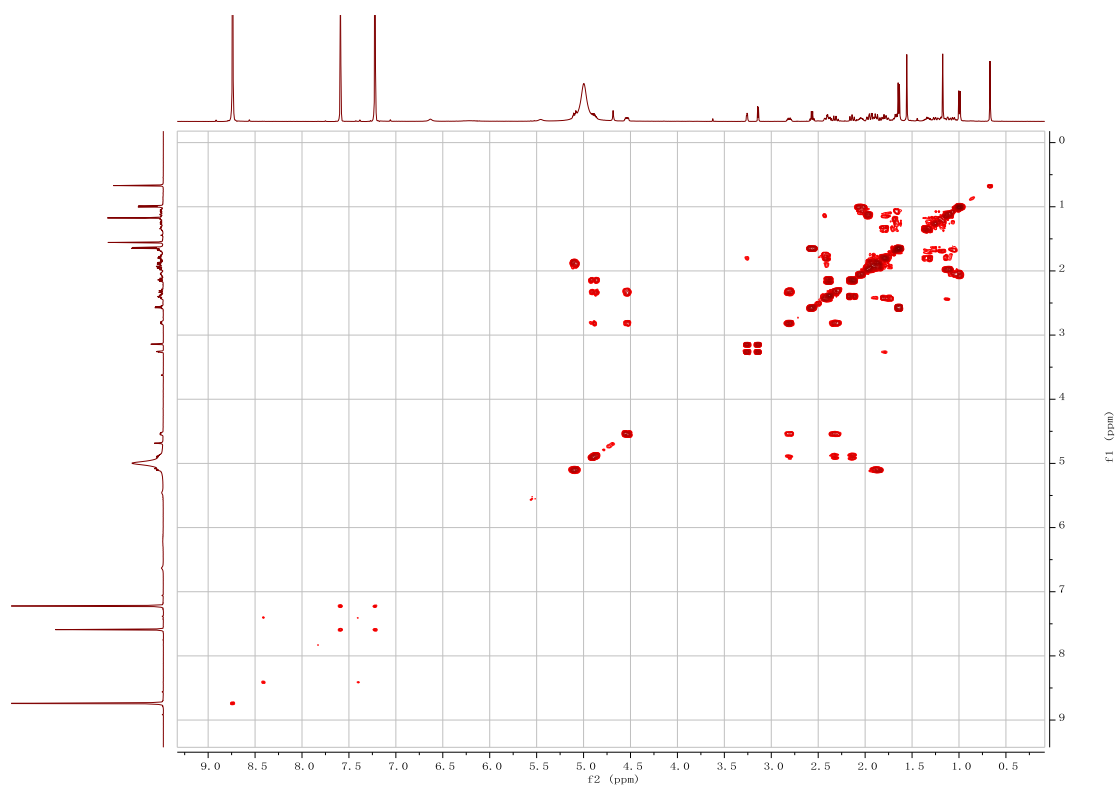

**Figure S80.** <sup>1</sup>H-<sup>1</sup>H COSY spectrum of chantriolide O (**10**) in C<sub>5</sub>D<sub>5</sub>N



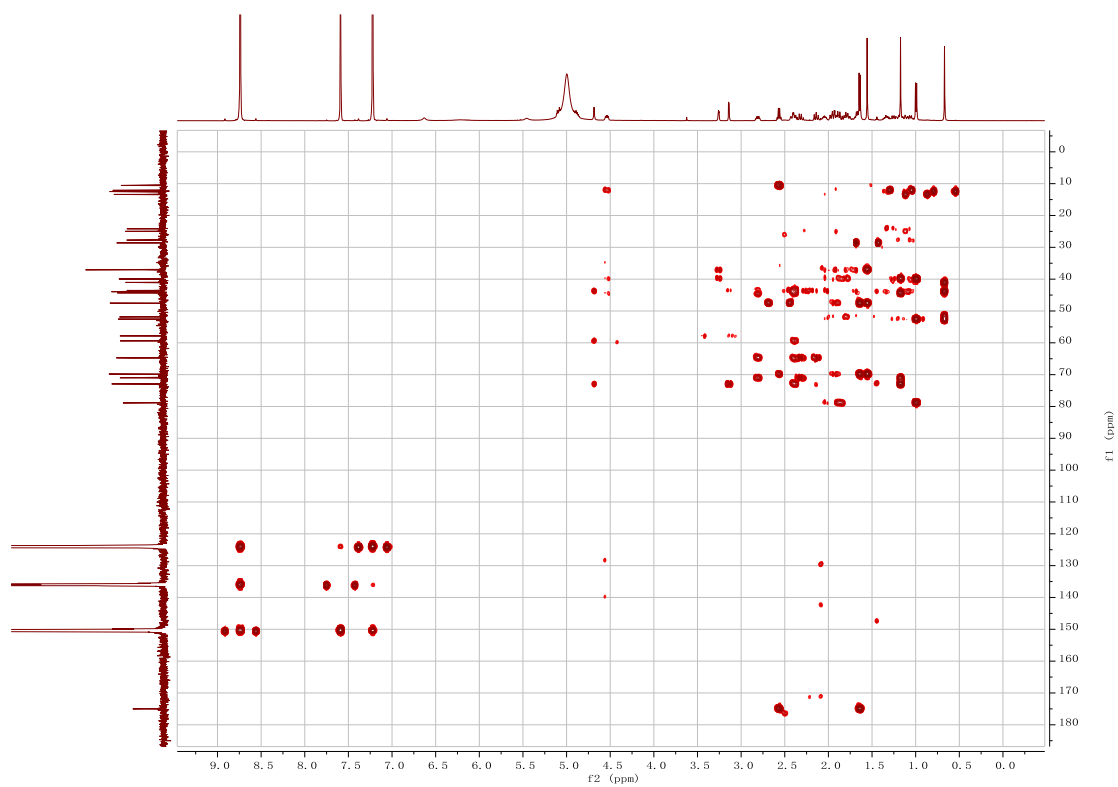

**Figure S81.** HMBC spectrum of chantriolide O (**10**) in C<sub>5</sub>D<sub>5</sub>N

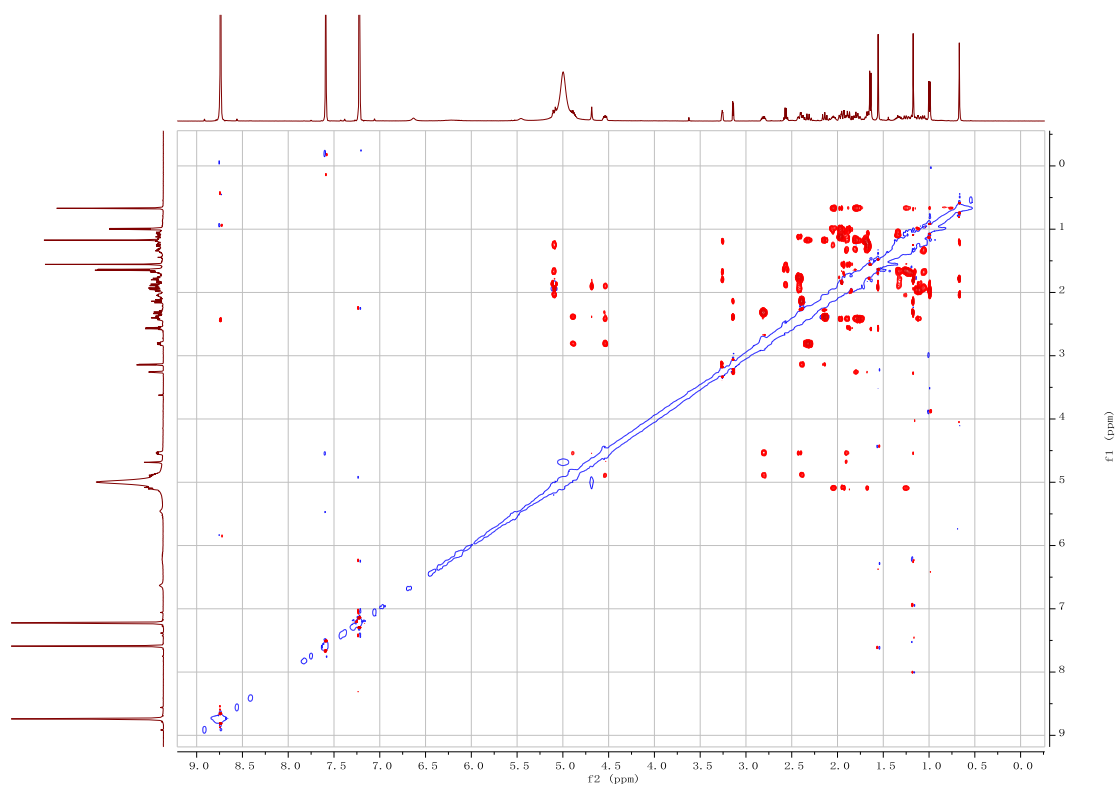

**Figure S82.** ROESY spectrum of chantriolide O (**10**) in C<sub>5</sub>D<sub>5</sub>N

# Elemental Composition Report

Tolerance = 5.0 PPM / DBE: min = -1.5, max = 50.0

Element prediction: Off

Number of isotope peaks used for i-FIT = 3

Monoisotopic Mass, Even Electron Ions

208 formula(e) evaluated with 1 results within limits (up to 50 best isotopic matches for each mass)

Elements Used:

C: 0-34 H: 0-200 N: 0-1 O: 0-30

Minimum: 80.00 -1.5

Maximum: 100.00 5.0 5.0 50.0

| Mass     | RA     | Calc. Mass | mDa | PPM | DBE | i-FIT | Norm | Conf(%) | Formula      |
|----------|--------|------------|-----|-----|-----|-------|------|---------|--------------|
| 508.3284 | 100.00 | 508.3274   | 1.0 | 2.0 | 6.5 | 583.2 | n/a  | n/a     | C28 H46 N O7 |

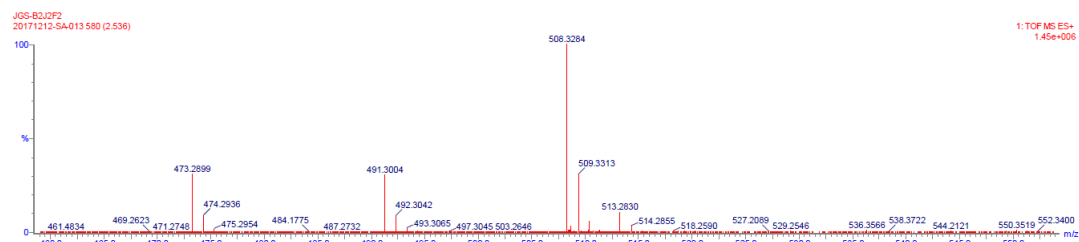

Figure S83. HRESIMS spectrum of chantriolide P (11)

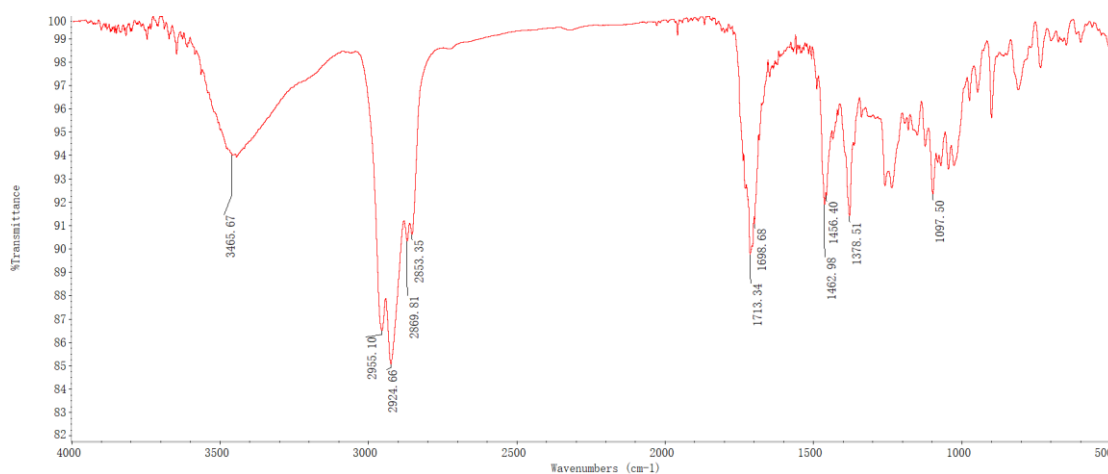

Figure S84. IR spectrum of chantriolide P (11)

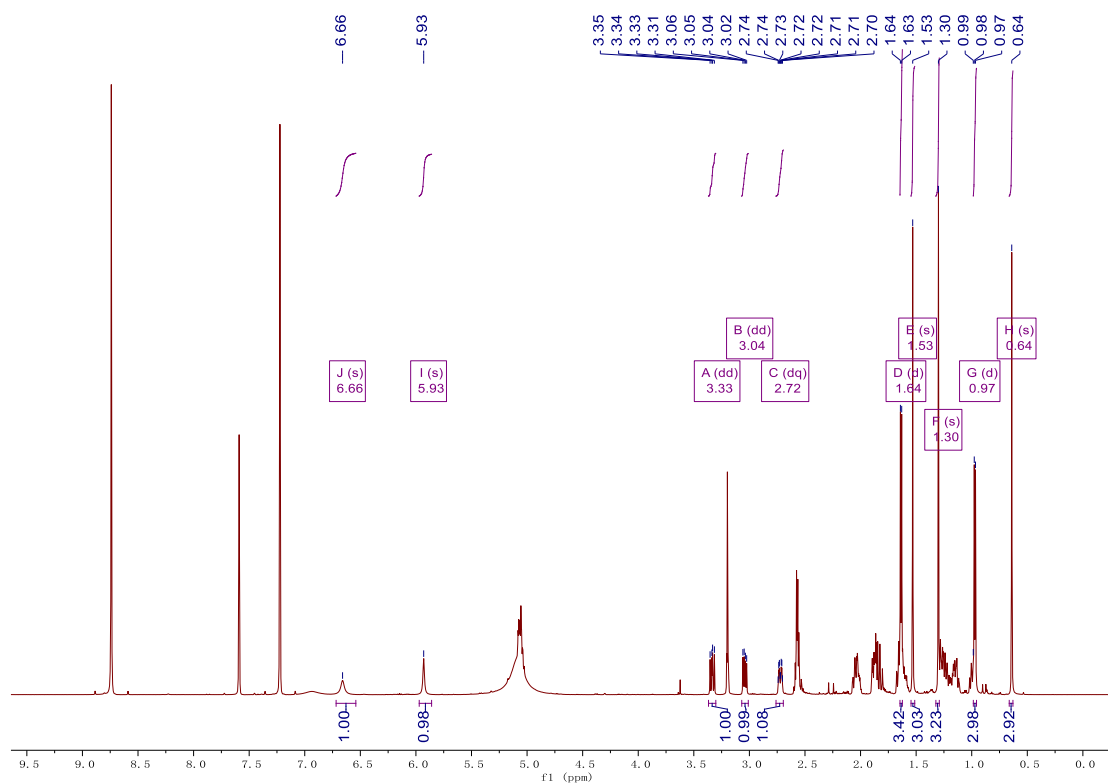

**Figure S85.** <sup>1</sup>H NMR (600 MHz) spectrum of chantriolide P (**11**) in C<sub>5</sub>D<sub>5</sub>N

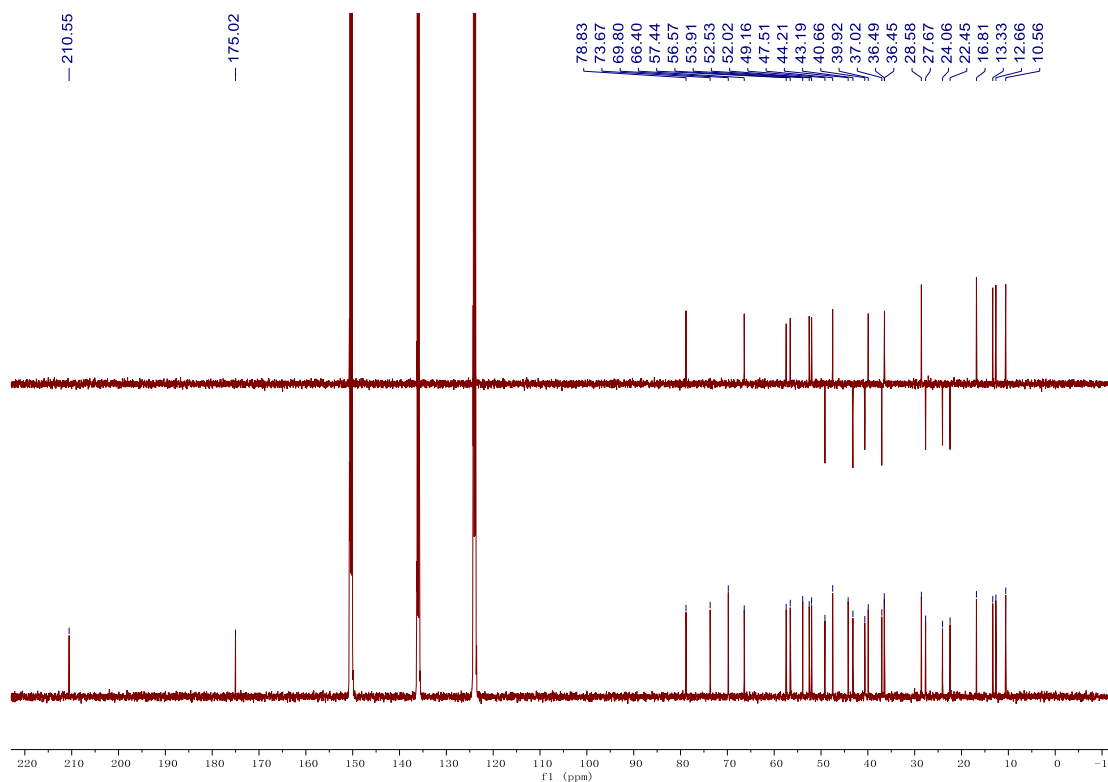

**Figure S86.** <sup>13</sup>C and DEPT-135 NMR (125 MHz) spectra of chantriolide P (**11**) in C<sub>5</sub>D<sub>5</sub>N

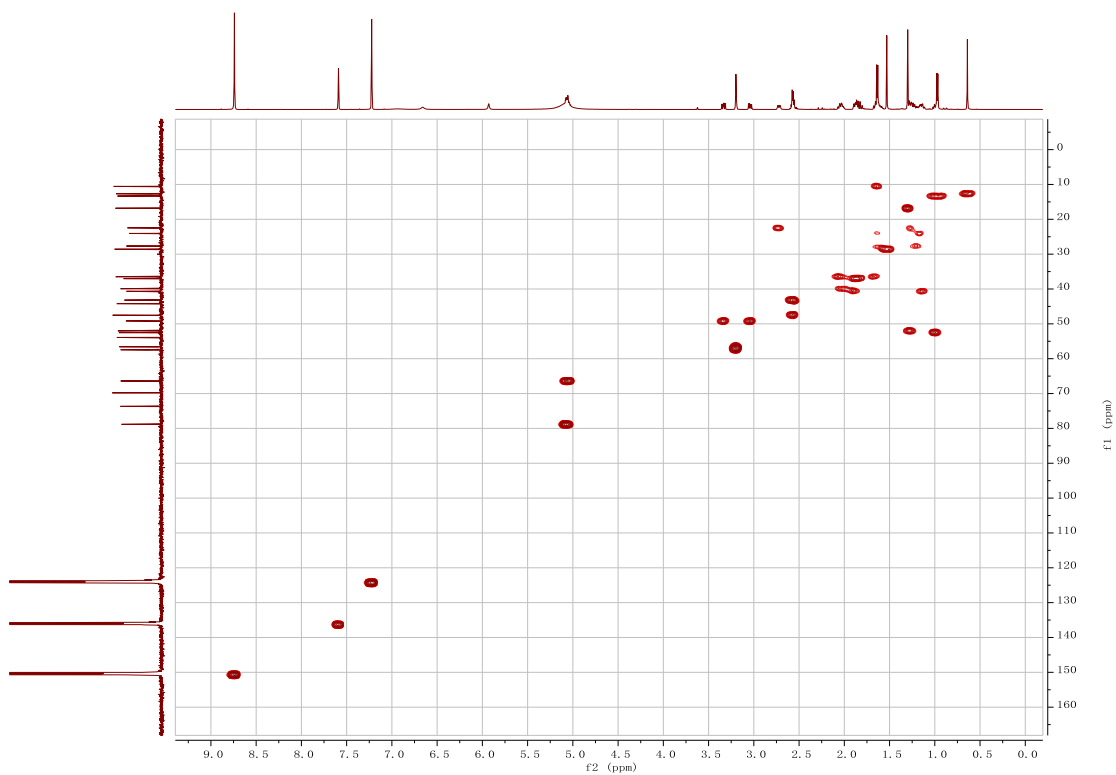

**Figure S87.** HSQC spectrum of chantriolide P (**11**) in C<sub>5</sub>D<sub>5</sub>N

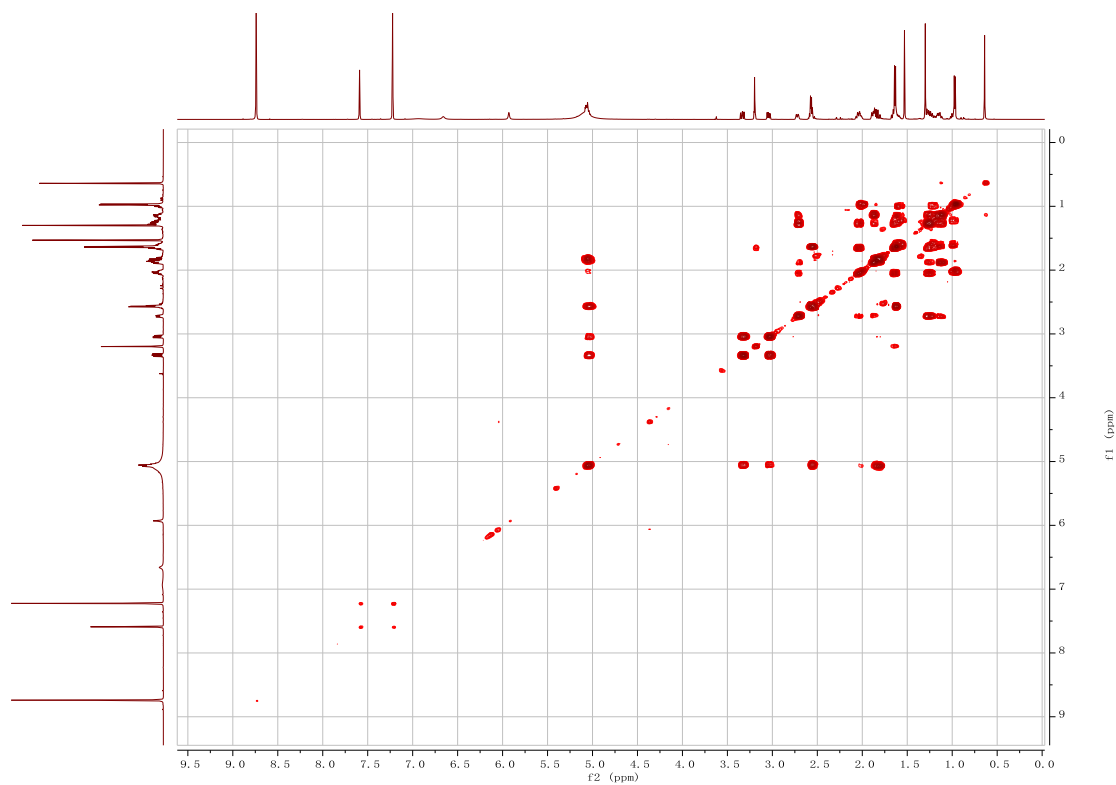

**Figure S88.** <sup>1</sup>H-<sup>1</sup>H COSY spectrum of chantriolide P (**11**) in C<sub>5</sub>D<sub>5</sub>N

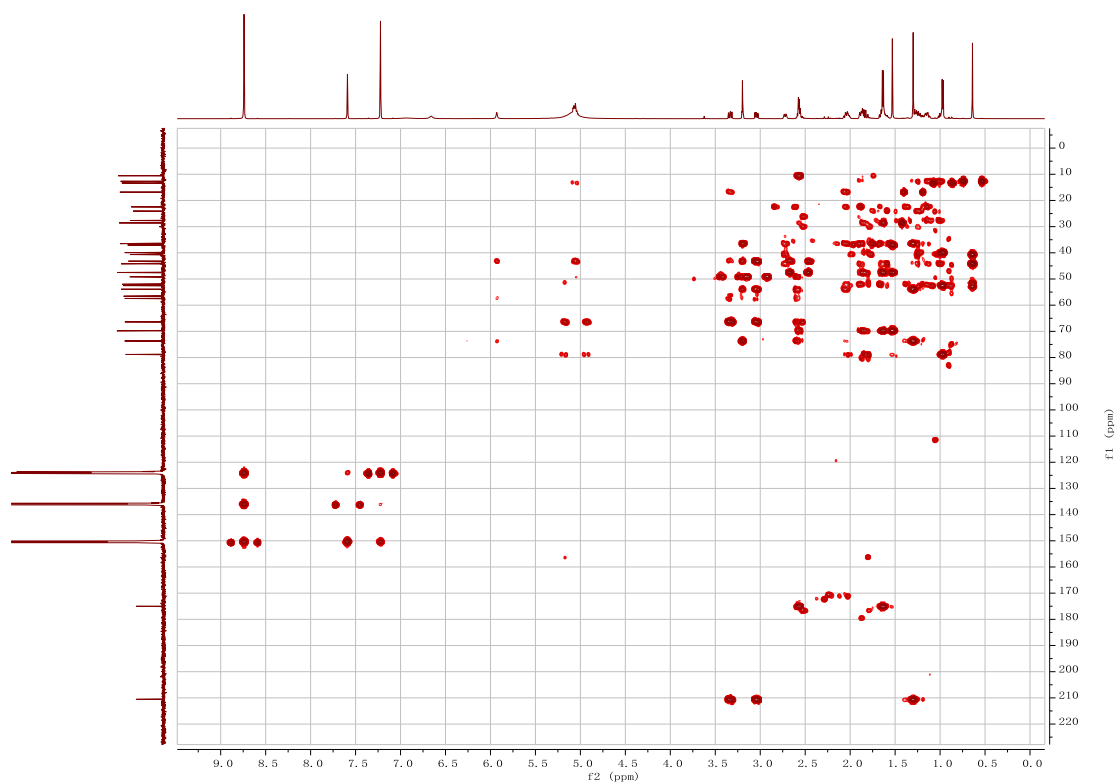

**Figure S89.** HMBC spectrum of chantriolide P (**11**) in C<sub>5</sub>D<sub>5</sub>N

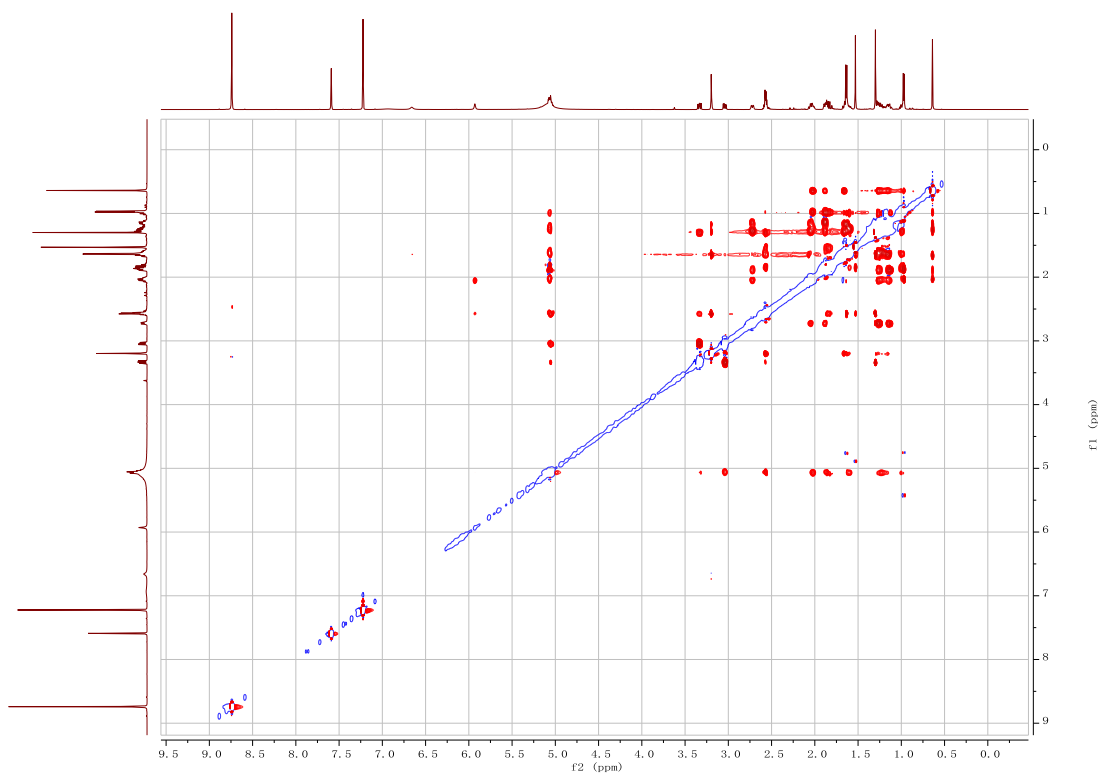

**Figure S90.** ROESY spectrum of chantriolide P (**11**) in C<sub>5</sub>D<sub>5</sub>N

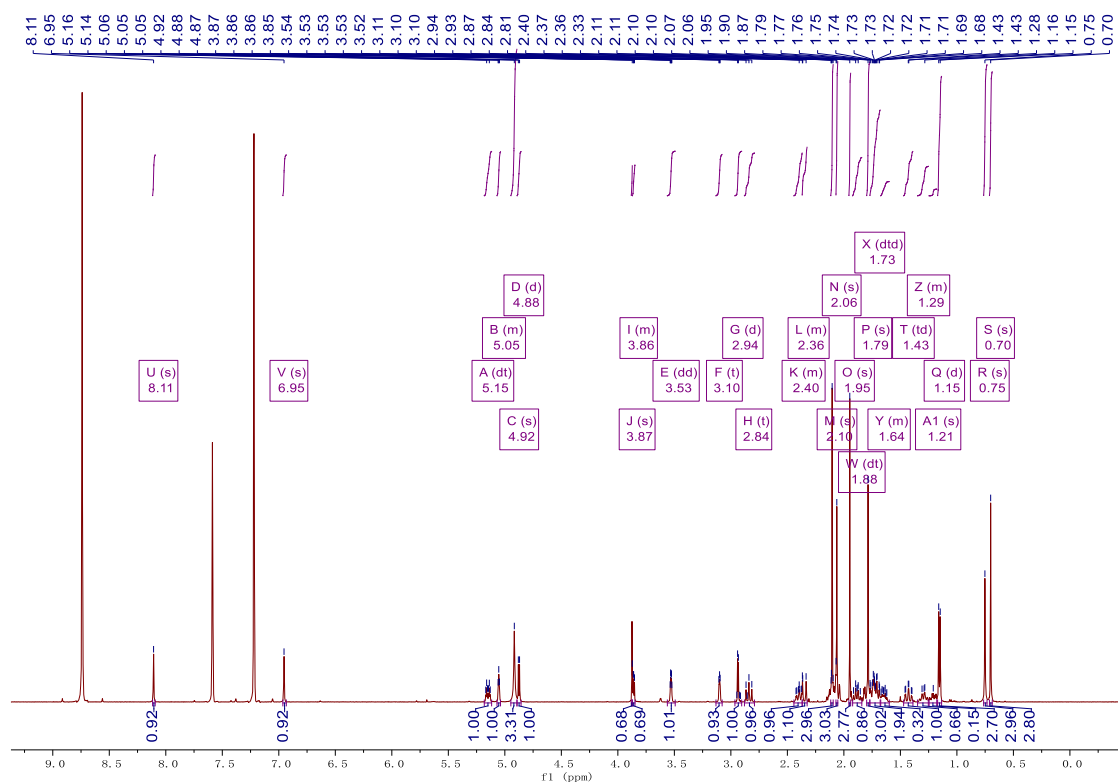

**Figure S91.  $^1\text{H}$  NMR (500 MHz) spectrum of plantagiolide E (**12**) in  $\text{C}_5\text{D}_5\text{N}$**

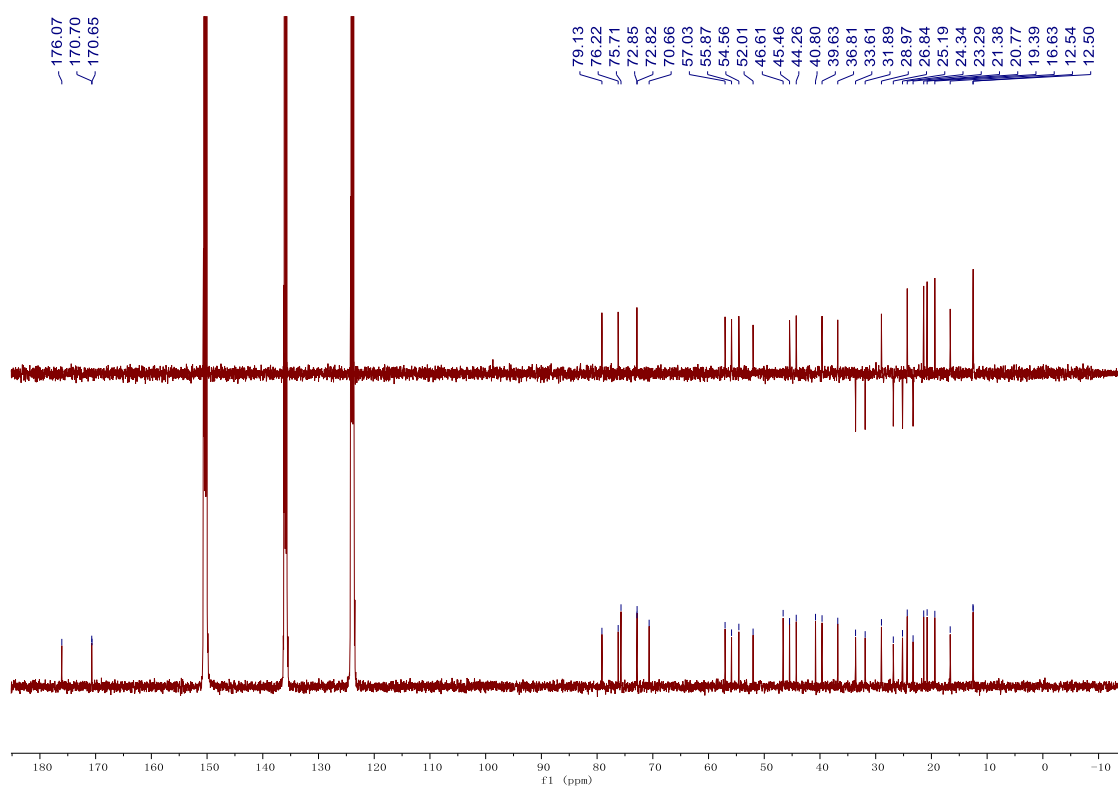

**Figure S92.  $^{13}\text{C}$  and DEPT-135 NMR (125 MHz) spectra of plantagiolide E (**12**) in  $\text{C}_5\text{D}_5\text{N}$**

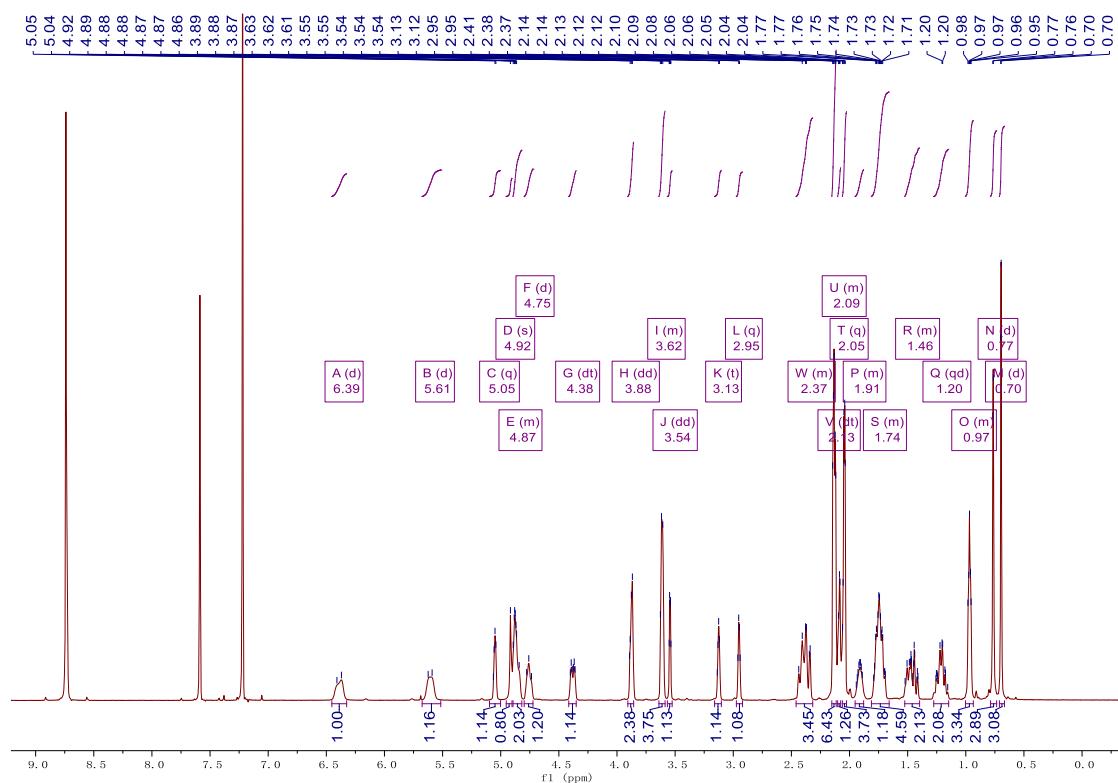

**Figure S93.  $^1\text{H}$  NMR (500 MHz) spectrum of plantagiolide C (**13**) in  $\text{C}_5\text{D}_5\text{N}$**

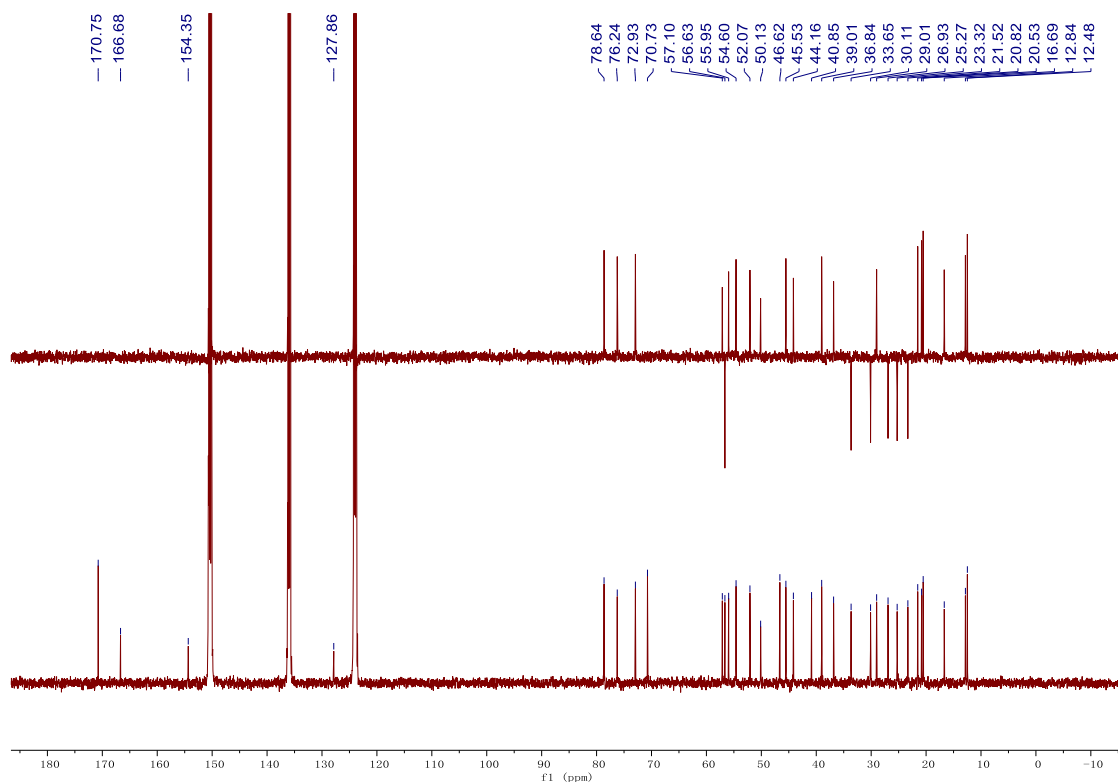

**Figure S94.  $^{13}\text{C}$  and DEPT-135 NMR (125 MHz) spectra of plantagiolide C (**13**) in  $\text{C}_5\text{D}_5\text{N}$**

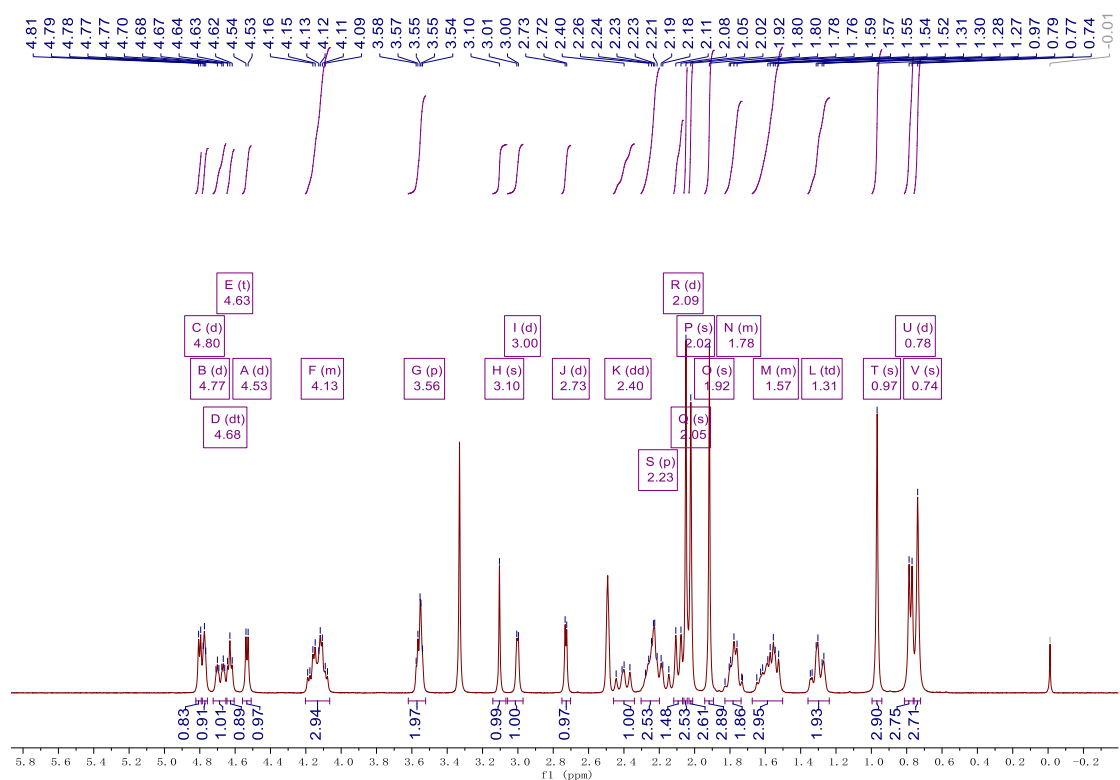

**Figure S95.**  $^1\text{H}$  NMR (400 MHz) spectrum of plantagiolide B (**14**) in  $\text{DMSO}-d_6$

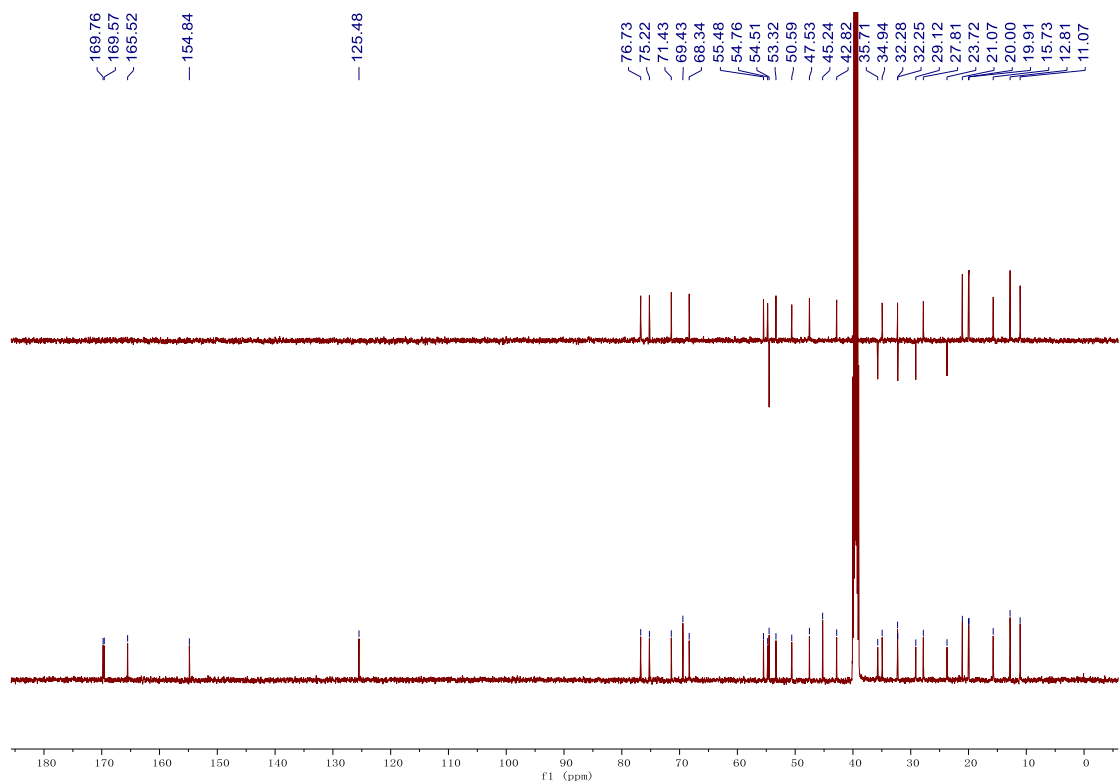

**Figure S96.**  $^{13}\text{C}$  and DEPT-135 NMR (125 MHz) spectra of plantagiolide B (**14**) in  $\text{DMSO}-d_6$



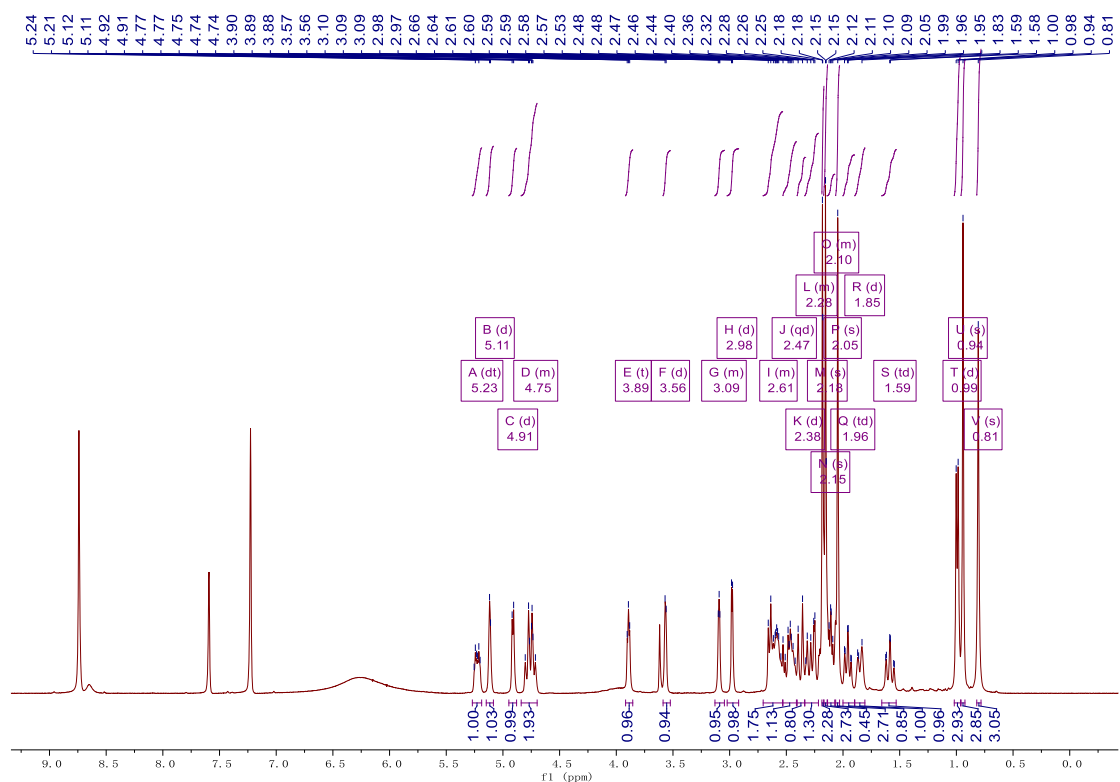

**Figure S97.  $^1\text{H}$  NMR (400 MHz) spectrum of plantagiolide A (**15**) in  $\text{C}_5\text{D}_5\text{N}$**

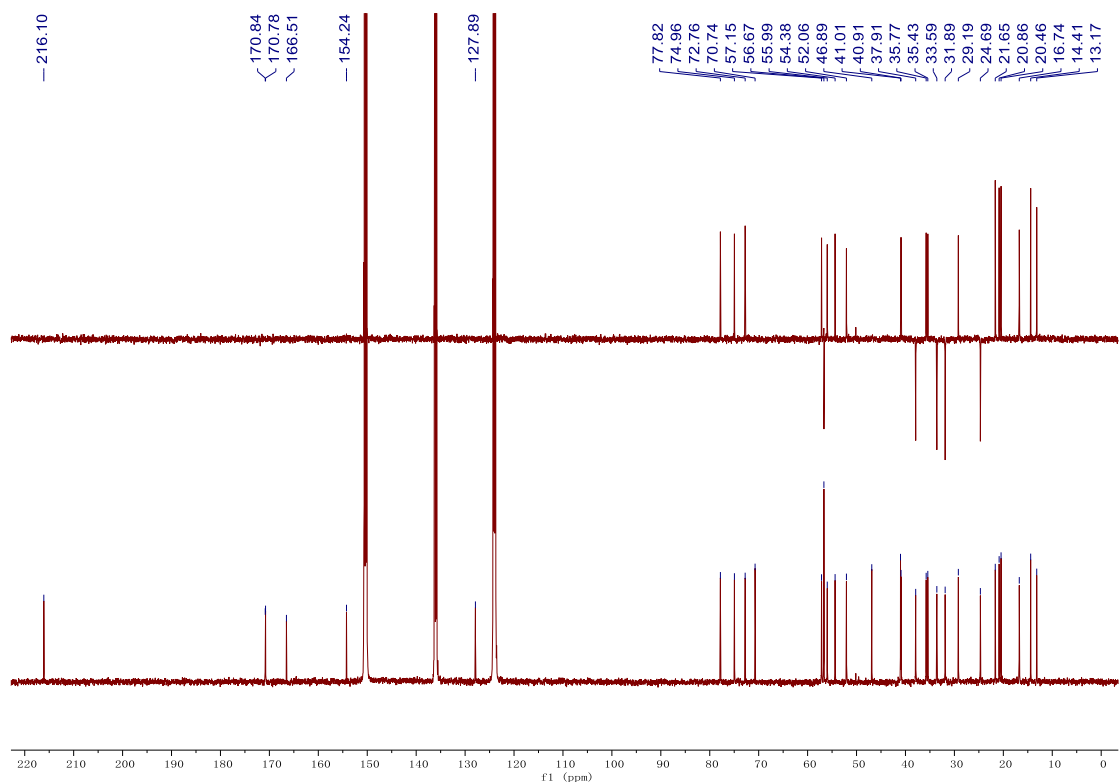

**Figure S98.  $^{13}\text{C}$  and DEPT-135 NMR (125 MHz) spectra of plantagiolide A (**15**) in  $\text{C}_5\text{D}_5\text{N}$**

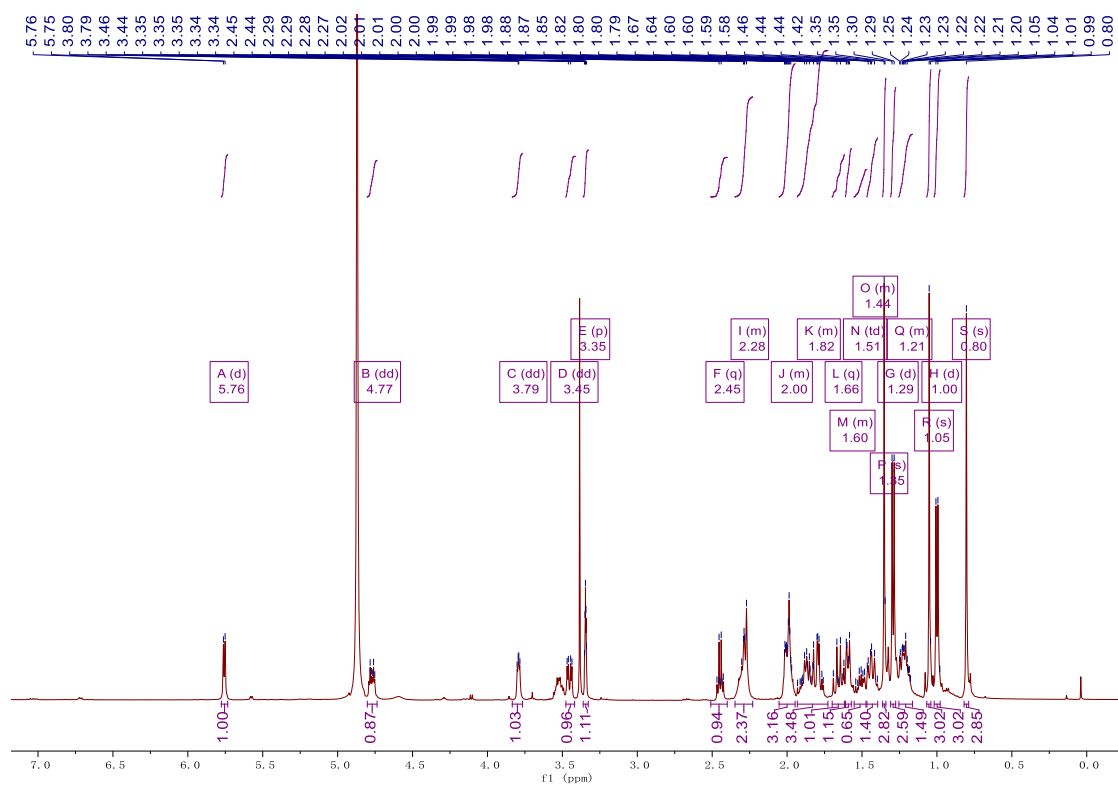

**Figure S99.**  $^1\text{H}$  NMR (500 MHz) spectrum of plantagiolide M (**16**) in  $\text{CD}_3\text{OD}$

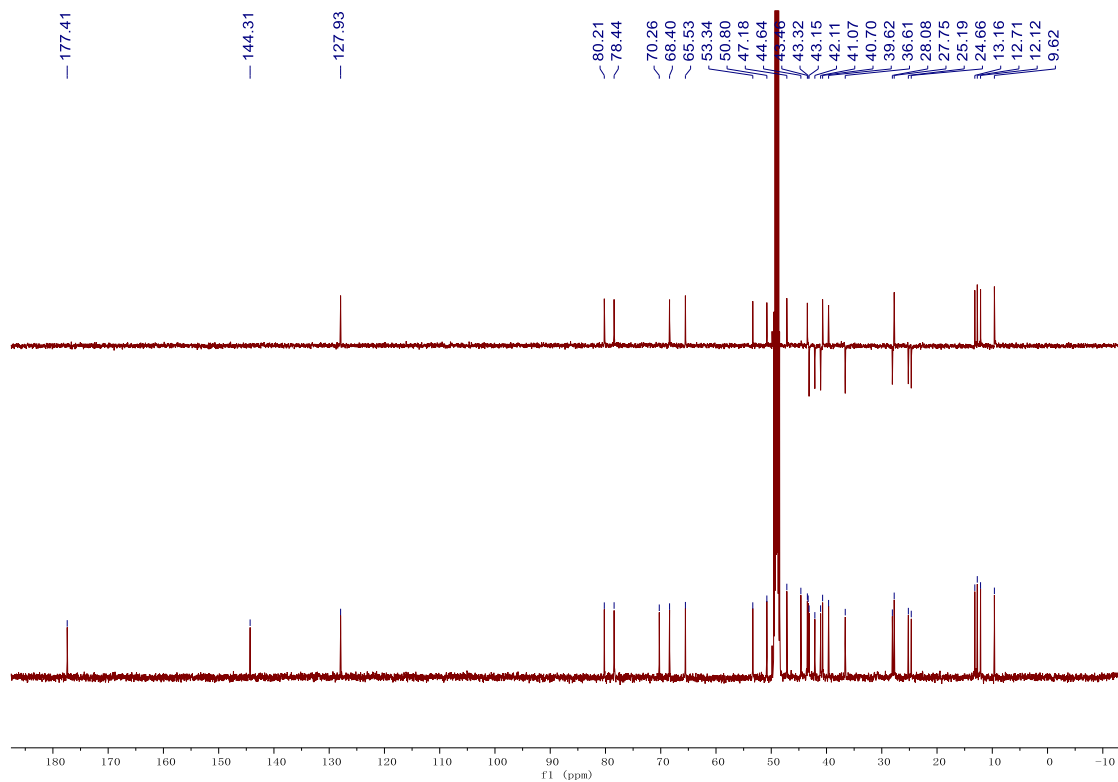

**Figure S100.**  $^{13}\text{C}$  and DEPT-135 NMR (125 MHz) spectra of plantagiolide M (**16**) in  $\text{CD}_3\text{OD}$

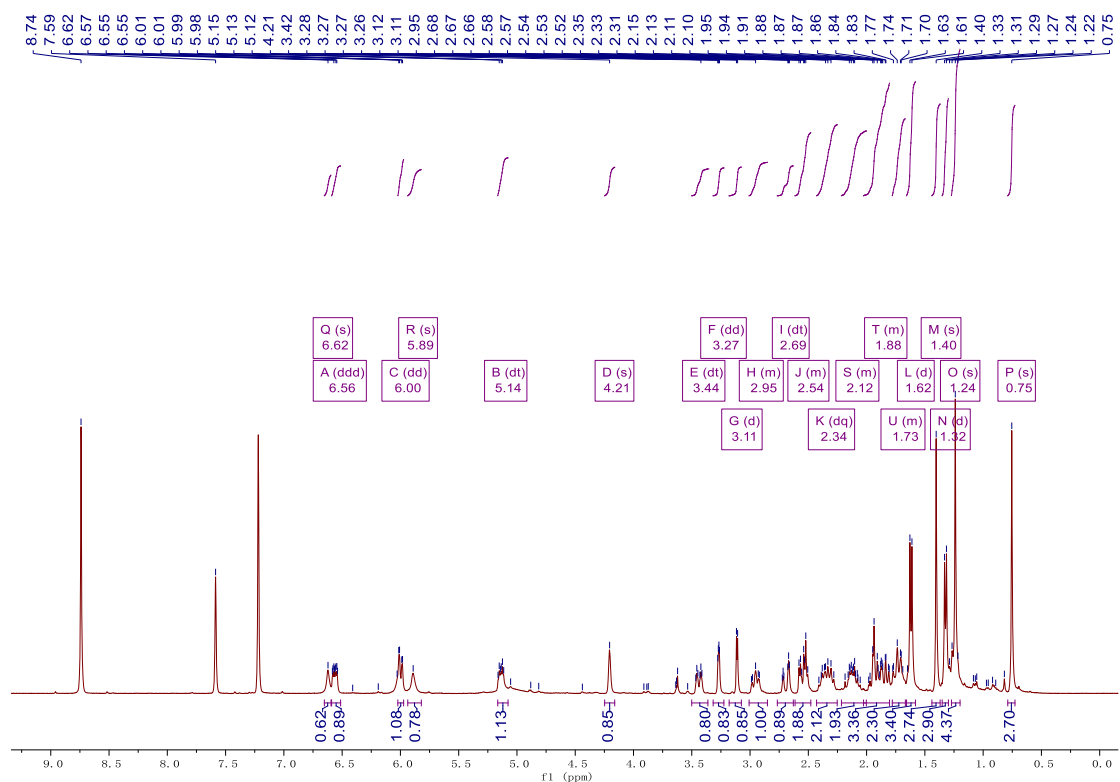

**Figure S101.**  $^1\text{H}$  NMR (400 MHz) spectrum of chantriolide D (**17**) in  $\text{C}_5\text{D}_5\text{N}$

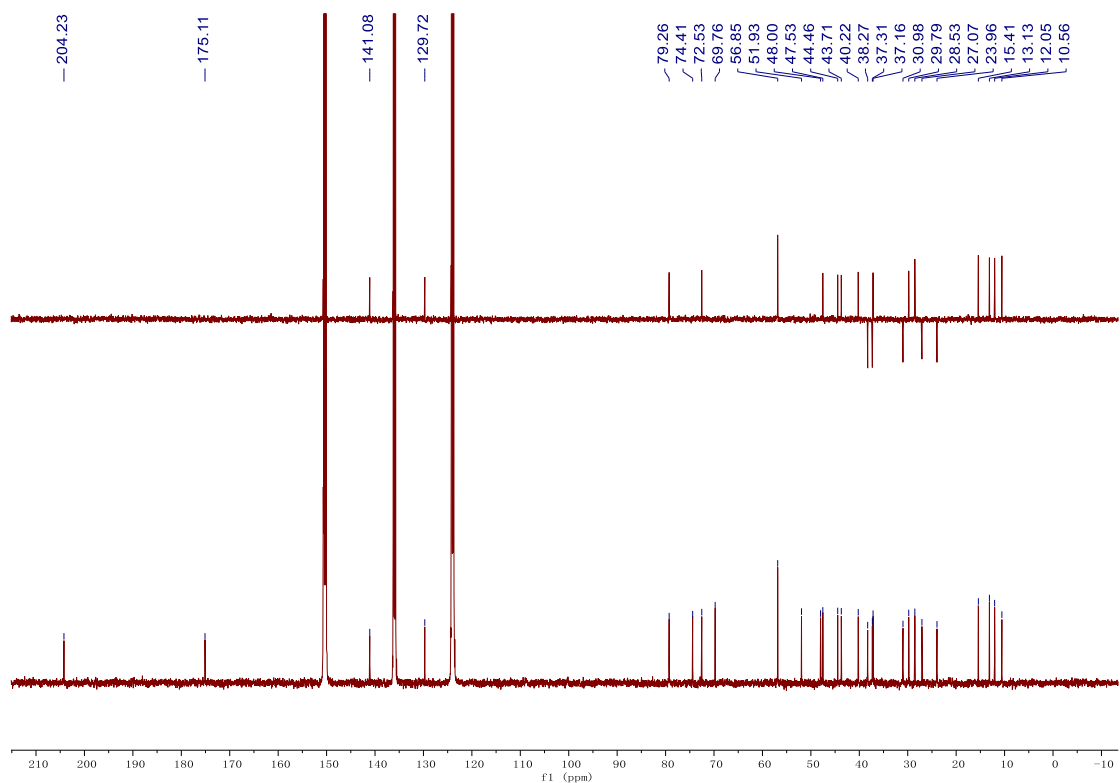

**Figure S102.**  $^{13}\text{C}$  and DEPT-135 NMR (125 MHz) spectra of chantriolide D (**17**) in  $\text{C}_5\text{D}_5\text{N}$

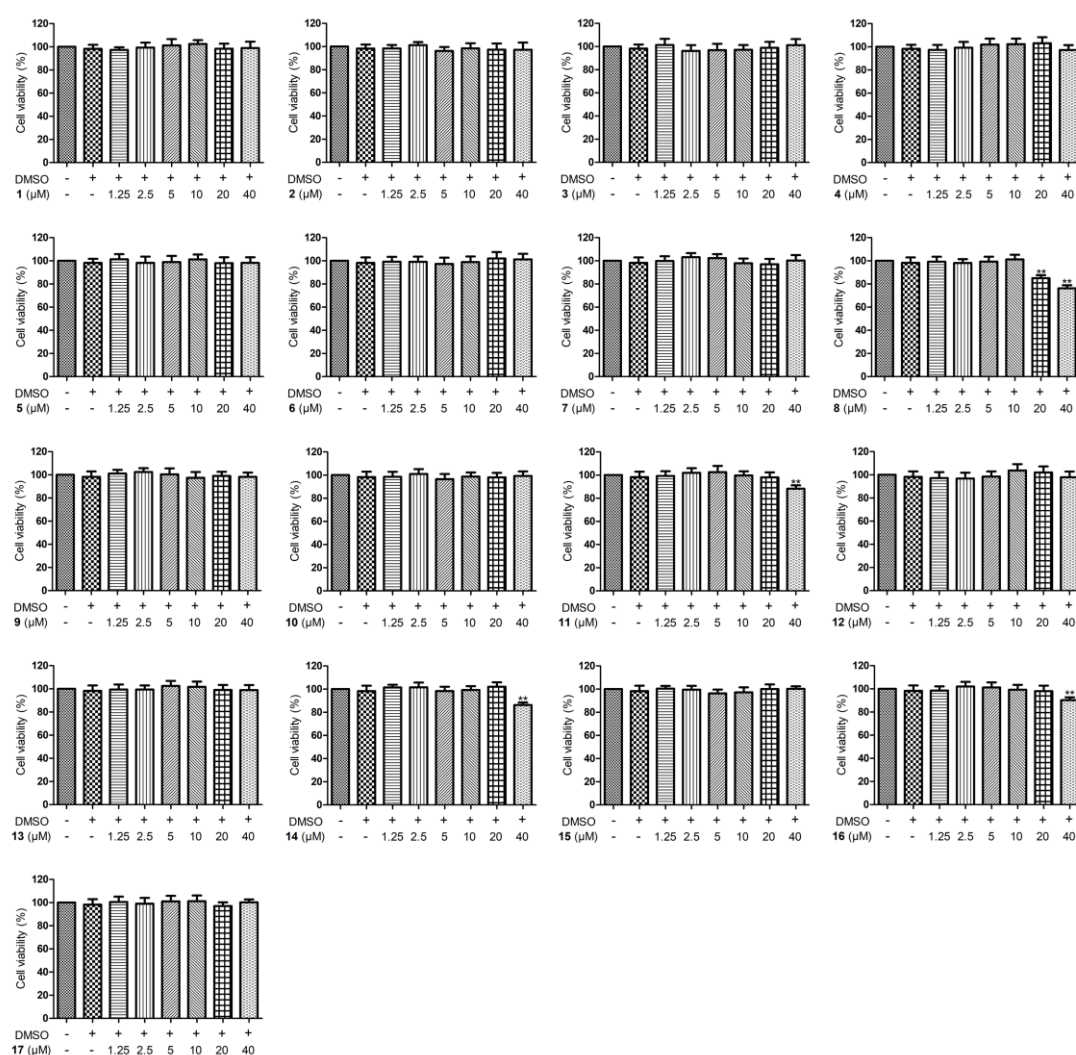

**Figure S103.** Cytotoxicity of compounds 1–17 on AML-12 hepatocytes. AML-12 cells were treated with different compounds at indicated concentrations for 24 hours. Data are shown as mean  $\pm$  S.D.,  $n = 3$ . \* $P < 0.05$  and \*\* $P < 0.01$  vs. DMSO.
